# Supplementary material for: One-pot catalytic asymmetric borylation of unsaturated aldehyde-derived imines; functionalisation to homoallylic boronate carboxylate ester derivatives
Source: Royal Society of Chemistry journal article supplement (doi:10.1039/c4ob02657h), 2015-01-01
Supplement: c4ob02657h1.pdf [file c4ob02657h1.pdf]

## Supporting Information

### **One-pot catalytic asymmetric borylation of unsaturated aldehyde-derived imines; functionalisation to homoallylic boronate carboxylate ester derivatives.**

Alba Pujol, Adam D. J. Calow, Andrei S. Batsanov and Andrew Whiting

1. ReactIR studies on *in situ* imine formation
2. Chiral HPLC
3.  $^1\text{H}$ ,  $^{13}\text{C}$ ,  $^{11}\text{B}$  NMR spectra
4. Crystallographic structures and data
5. References

## 1. ReactIR studies on *in situ* imine formation

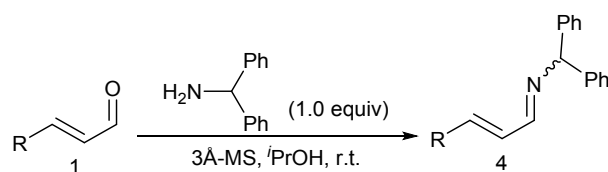

**Scheme 1** Formation of  $\alpha,\beta$ -unsaturated imines in *i*PrOH.

**Standard conditions:** To an oven-dried two-necked flask, fitted with the IR probe, enal (2.0 mmol) was added to a stirring solution of solvent (8.0 mL) and 3 Å-molecular sieve beads (2.0 g, oven-dried at 250 °C for >48 h prior to use), under argon at 25 °C. Once the C=O peak had plateaued (observed through PC-interface), showing maximum intensity, amine (2.0 mmol) was added and the reaction was carried out for 0.5 – 24 h. The *in situ*-formed imine was then utilised without purification by using a needle-syringe combination.

Representative graphical output of the reaction between Cinnamaldehyde **1a** and benzhydramine (see standard conditions).

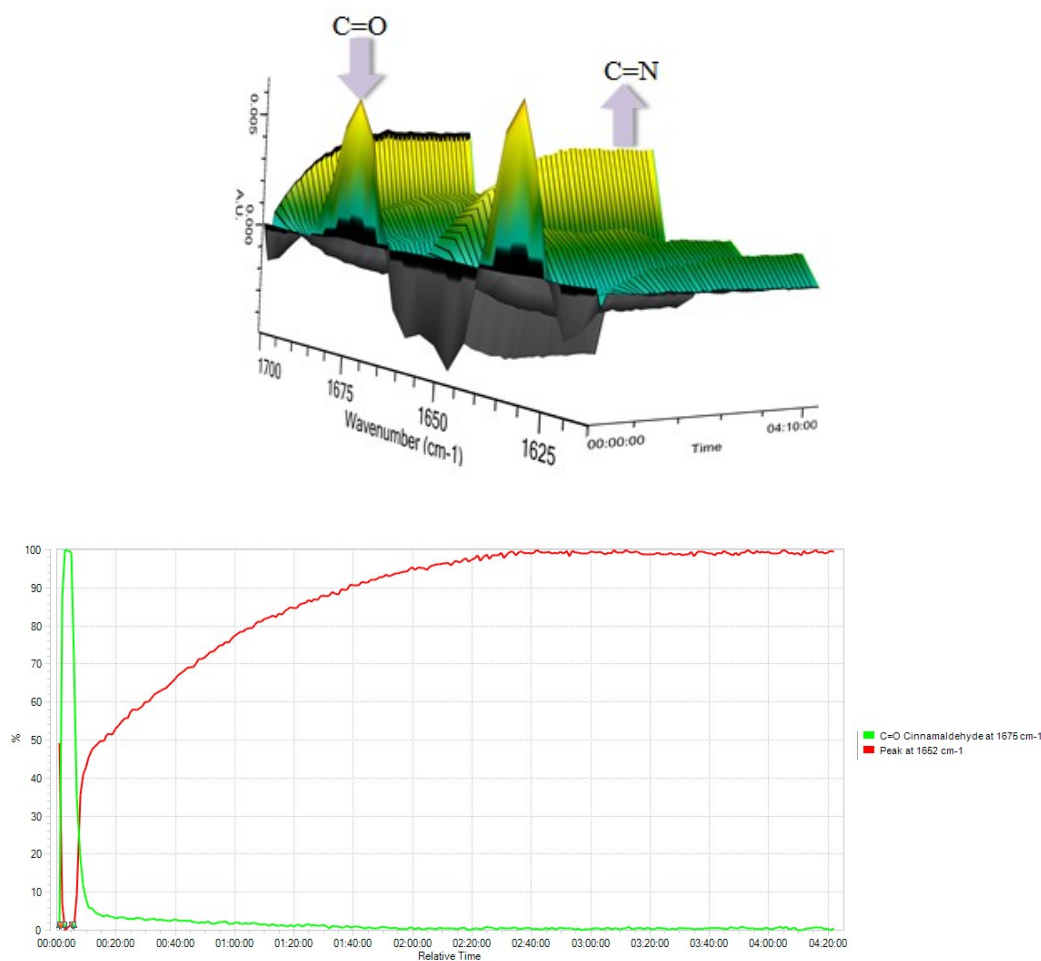

Reaction profile of 2-Hexenal **1d** and benzhydryl amine (see standard conditions).

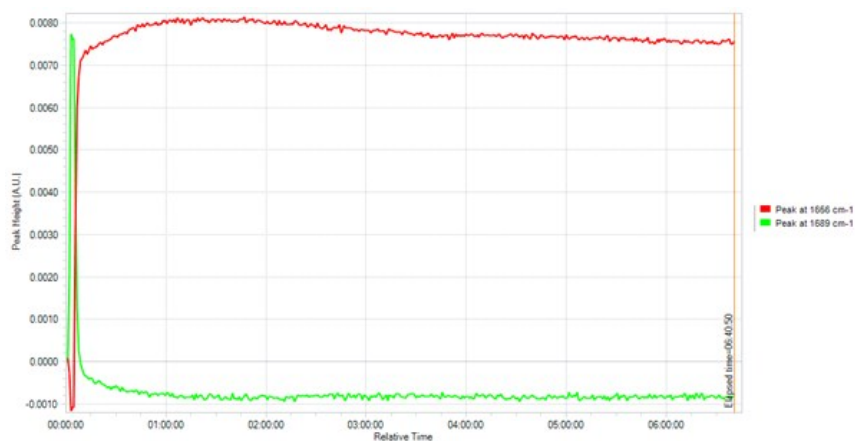

Reaction profile of Crotonaldehyde **1g** and benzhydryl amine (see standard conditions).

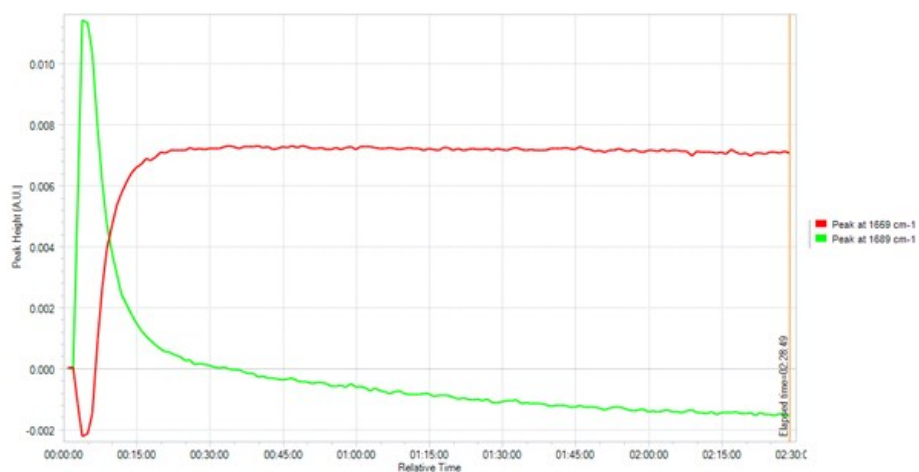

Reaction profile of (2*E*)-3-(Thiophen-2-yl)prop-2-enal **1j** and benzhydryl amine (see standard conditions).

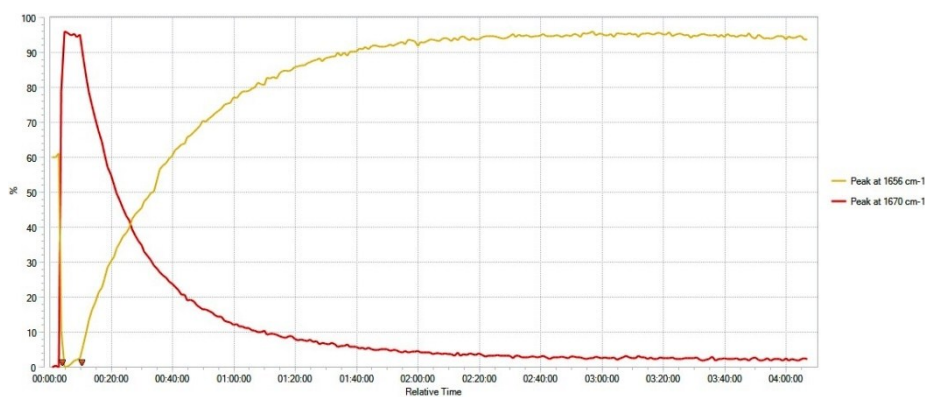

## 2. Chiral HPLC

Sample chromatograms: 1) Racemic standard; 2) Optimised asymmetric reaction (IPA, (*R*)-DM BINAP as ligand, unless otherwise stated).

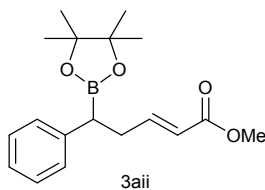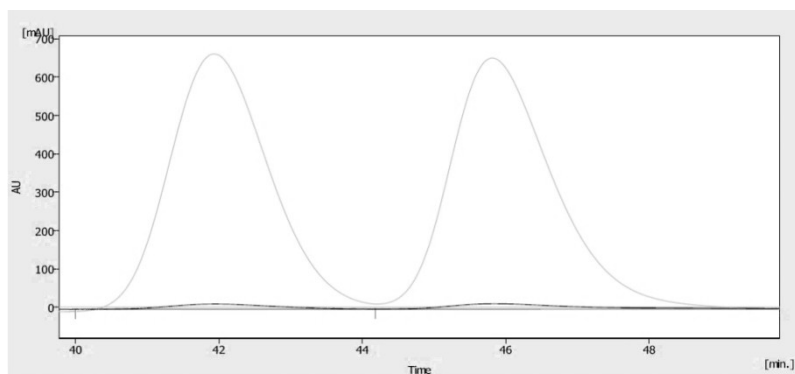

|       | Reten. Time [min] | Area [mAU.s] | Height [mAU] | Area [%] | Height [%] | W05 [min] | Compound Name |
|-------|-------------------|--------------|--------------|----------|------------|-----------|---------------|
| 1     | 6.127             | 23.010       | 0.282        | 0.0      | 0.0        | 1.41      |               |
| 2     | 13.173            | 457.230      | 2.414        | 0.3      | 0.2        | 3.59      |               |
| 3     | 17.120            | 830.722      | 11.873       | 0.6      | 0.9        | 0.79      |               |
| 4     | 19.033            | 228.956      | 5.204        | 0.2      | 0.4        | 0.65      |               |
| 5     | 22.893            | 1443.336     | 16.585       | 1.0      | 1.2        | 1.05      |               |
| 6     | 26.980            | 1390.905     | 8.311        | 1.0      | 0.6        | 2.36      |               |
| 7     | 36.413            | 1025.105     | 4.705        | 0.7      | 0.3        | 2.58      |               |
| 8     | 41.933            | 66252.971    | 673.329      | 47.2     | 48.6       | 1.54      |               |
| 9     | 45.813            | 68767.519    | 662.387      | 48.9     | 47.8       | 1.55      |               |
| 10    | 54.047            | 67.081       | 0.791        | 0.0      | 0.1        | 1.51      |               |
| Total |                   | 140486.834   | 1385.880     | 100.0    | 100.0      |           |               |

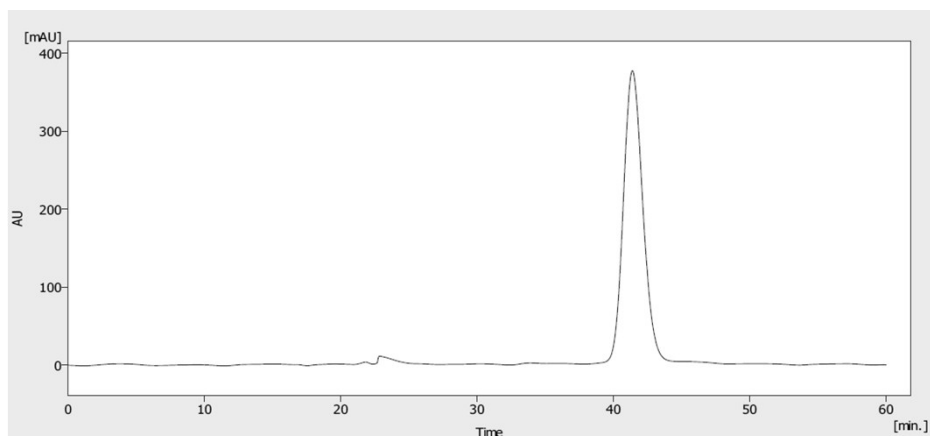

|       | Reten. Time [min] | Area [mAU.s] | Height [mAU] | Area [%] | Height [%] | W05 [min] | Compound Name |
|-------|-------------------|--------------|--------------|----------|------------|-----------|---------------|
| 1     | 3.893             | 479.949      | 2.604        | 1.1      | 0.6        | 3.06      |               |
| 2     | 9.560             | 262.330      | 1.375        | 0.6      | 0.3        | 3.21      |               |
| 3     | 14.900            | 546.002      | 2.262        | 1.2      | 0.5        | 4.65      |               |
| 4     | 19.593            | 325.961      | 2.205        | 0.7      | 0.5        | 2.78      |               |
| 5     | 21.793            | 260.632      | 4.627        | 0.6      | 1.1        | 0.93      |               |
| 6     | 22.847            | 1365.509     | 12.085       | 3.1      | 2.9        | 1.43      |               |
| 7     | 30.213            | 496.113      | 2.238        | 1.1      | 0.5        | 4.52      |               |
| 8     | 33.847            | 741.091      | 3.185        | 1.7      | 0.8        | 4.78      |               |
| 9     | 41.393            | 39118.242    | 377.873      | 88.2     | 91.7       | 1.55      |               |
| 10    | 50.893            | 456.305      | 1.916        | 1.0      | 0.5        | 4.21      |               |
| 11    | 57.107            | 319.777      | 1.675        | 0.7      | 0.4        | 3.34      |               |
| Total |                   | 44371.910    | 412.054      | 100.0    | 100.0      |           |               |

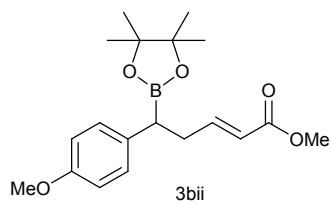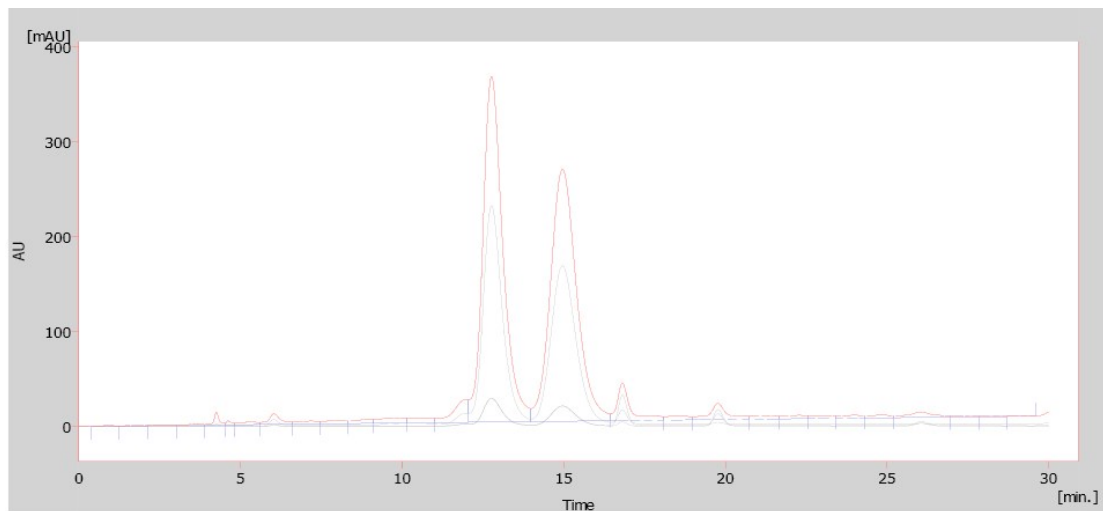

|    | Reten. Time [min] | Area [mAU.s] | Height [mAU] | Area [%] | Height [%] | W05 [min] | Compound Name |
|----|-------------------|--------------|--------------|----------|------------|-----------|---------------|
| 1  | 4.247             | 17.614       | 1.941        | 0.1      | 0.4        | 0.13      |               |
| 2  | 4.580             | 4.838        | 0.505        | 0.0      | 0.1        | 0.19      |               |
| 3  | 5.327             | 13.070       | 0.611        | 0.1      | 0.1        | 0.30      |               |
| 4  | 6.027             | 128.701      | 6.447        | 0.6      | 1.5        | 0.29      |               |
| 5  | 9.780             | 112.939      | 0.722        | 0.6      | 0.2        | 1.74      |               |
| 6  | 11.947            | 326.622      | 12.364       | 1.6      | 2.8        | 0.41      |               |
| 7  | 12.767            | 9699.683     | 230.617      | 48.8     | 52.7       | 0.63      |               |
| 8  | 14.960            | 9172.587     | 167.331      | 46.2     | 38.2       | 0.84      |               |
| 9  | 16.813            | 328.515      | 15.239       | 1.7      | 3.5        | 0.32      |               |
| 10 | 19.753            | 33.832       | 1.573        | 0.2      | 0.4        | 0.34      |               |
| 11 | 26.013            | 20.094       | 0.522        | 0.1      | 0.1        | 0.55      |               |
|    | Total             | 19858.494    | 437.873      | 100.0    | 100.0      |           |               |

Optimised asymmetric reaction (THF/MeOH, *(R)*-DM-BINAP as ligand)

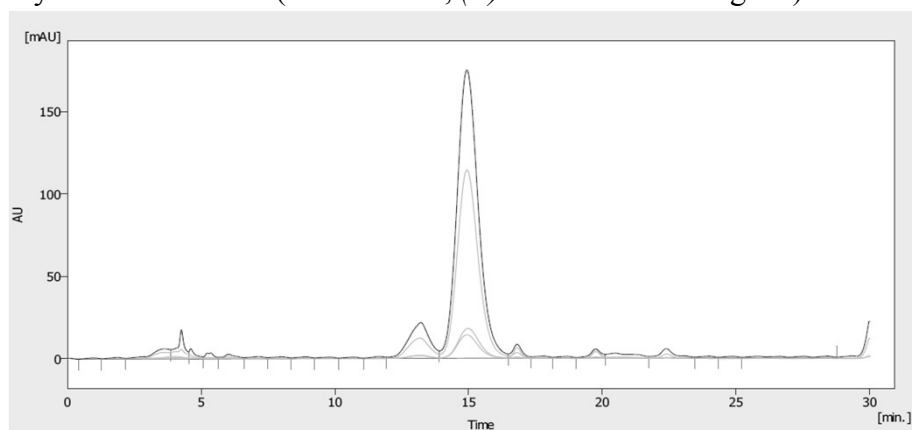

|    | Reten. Time [min] | Area [mAU.s] | Height [mAU] | Area [%] | Height [%] | W05 [min] | Compound Name |
|----|-------------------|--------------|--------------|----------|------------|-----------|---------------|
| 1  | 0.980             | 26.145       | 0.871        | 0.2      | 0.3        | 0.53      |               |
| 2  | 1.873             | 39.001       | 1.100        | 0.3      | 0.4        | 0.67      |               |
| 3  | 3.607             | 301.871      | 6.245        | 2.3      | 2.3        | 0.68      |               |
| 4  | 4.260             | 331.373      | 17.712       | 2.5      | 6.6        | 0.19      |               |
| 5  | 4.607             | 99.678       | 6.291        | 0.8      | 2.3        | 0.21      |               |
| 6  | 5.360             | 81.983       | 3.695        | 0.6      | 1.4        | 0.35      |               |
| 7  | 6.020             | 95.396       | 2.901        | 0.7      | 1.1        | 0.51      |               |
| 8  | 7.140             | 54.667       | 1.373        | 0.4      | 0.5        | 0.86      |               |
| 9  | 8.020             | 50.192       | 1.222        | 0.4      | 0.5        | 0.83      |               |
| 10 | 8.900             | 43.740       | 1.182        | 0.3      | 0.4        | 0.69      |               |
| 11 | 9.787             | 37.110       | 0.967        | 0.3      | 0.4        | 0.70      |               |
| 12 | 10.667            | 32.973       | 0.915        | 0.3      | 0.3        | 0.62      |               |
| 13 | 11.620            | 41.378       | 1.229        | 0.3      | 0.5        | 0.59      |               |
| 14 | 13.207            | 1180.689     | 21.785       | 9.0      | 8.1        | 0.85      |               |
| 15 | 14.933            | 9691.124     | 175.071      | 73.9     | 65.0       | 0.85      |               |
| 16 | 16.813            | 212.967      | 8.414        | 1.6      | 3.1        | 0.37      |               |
| 17 | 17.793            | 47.631       | 1.231        | 0.4      | 0.5        | 0.75      |               |
| 18 | 18.653            | 38.252       | 1.010        | 0.3      | 0.4        | 0.69      |               |
| 19 | 19.747            | 154.338      | 5.487        | 1.2      | 2.0        | 0.43      |               |
| 20 | 20.473            | 202.823      | 2.869        | 1.5      | 1.1        | 1.41      |               |
| 21 | 22.387            | 202.408      | 5.516        | 1.5      | 2.0        | 0.44      |               |
| 22 | 23.960            | 31.769       | 0.909        | 0.2      | 0.3        | 0.60      |               |
| 23 | 24.860            | 25.673       | 0.805        | 0.2      | 0.3        | 0.54      |               |
| 24 | 28.393            | 89.221       | 0.720        | 0.7      | 0.3        | 0.48      |               |
|    | Total             | 13112.402    | 269.521      | 100.0    | 100.0      |           |               |

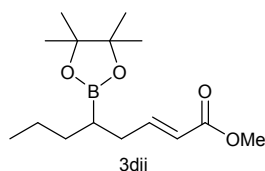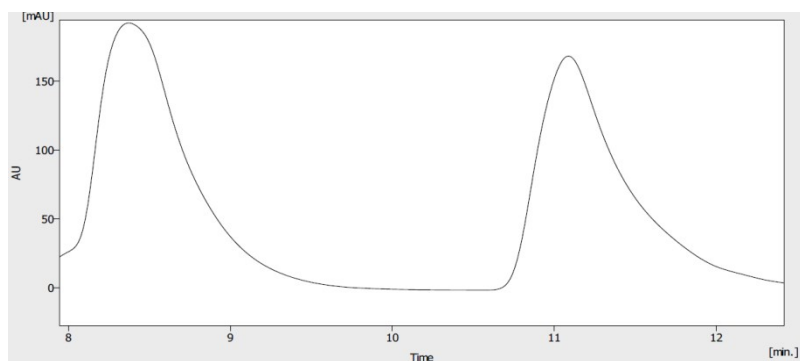

|    | Reten. Time [min] | Area [mAU.s] | Height [mAU] | Area [%] | Height [%] | W05 [min] | Compound Name |
|----|-------------------|--------------|--------------|----------|------------|-----------|---------------|
| 1  | 5.360             | 134.678      | 5.939        | 0.2      | 0.3        | 0.43      |               |
| 2  | 6.627             | 584.507      | 12.656       | 0.9      | 0.7        | 0.60      |               |
| 3  | 7.593             | 1987.348     | 86.184       | 3.1      | 4.9        | 0.31      |               |
| 4  | 7.953             | 2755.013     | 108.175      | 4.4      | 6.1        | 0.52      |               |
| 5  | 8.720             | 28100.181    | 805.924      | 44.5     | 45.7       | 0.49      |               |
| 6  | 11.140            | 25813.031    | 710.028      | 40.8     | 40.3       | 0.49      |               |
| 7  | 18.340            | 1372.991     | 16.792       | 2.2      | 1.0        | 1.15      |               |
| 8  | 20.653            | 375.514      | 3.268        | 0.6      | 0.2        | 1.98      |               |
| 9  | 24.347            | 561.743      | 4.599        | 0.9      | 0.3        | 2.47      |               |
| 10 | 26.880            | 483.170      | 3.243        | 0.8      | 0.2        | 2.78      |               |
| 11 | 30.180            | 607.202      | 3.502        | 1.0      | 0.2        | 2.60      |               |
| 12 | 36.273            | 431.676      | 3.377        | 0.7      | 0.2        | 2.13      |               |
|    | Total             | 63207.052    | 1763.686     | 100.0    | 100.0      |           |               |

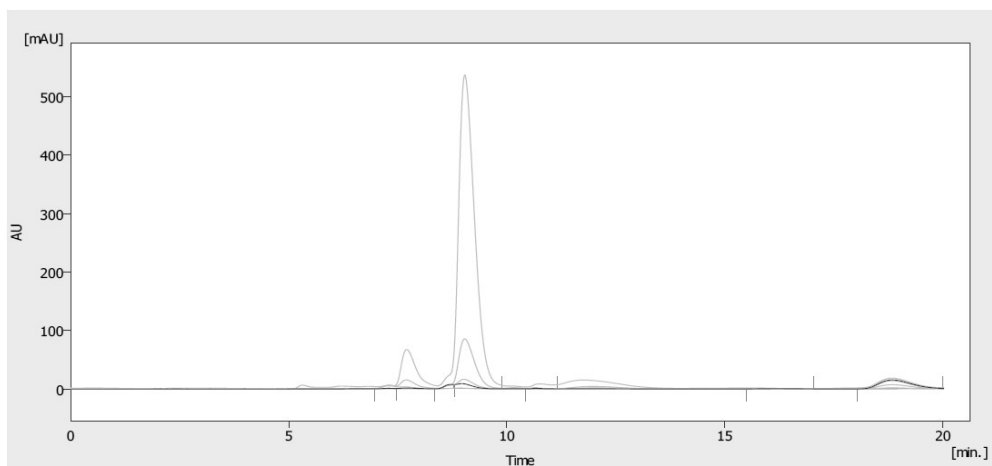

|    | Reten. Time [min] | Area [mAU.s] | Height [mAU] | Area [%] | Height [%] | W05 [min] | Compound Name |
|----|-------------------|--------------|--------------|----------|------------|-----------|---------------|
| 1  | 0.460             | 28.780       | 0.509        | 0.1      | 0.1        | 0.81      |               |
| 2  | 5.313             | 139.995      | 6.885        | 0.7      | 1.0        | 0.37      |               |
| 3  | 6.200             | 239.348      | 5.271        | 1.2      | 0.8        | 0.94      |               |
| 4  | 6.807             | 117.488      | 4.876        | 0.6      | 0.7        | 0.43      |               |
| 5  | 7.313             | 121.319      | 6.029        | 0.6      | 0.9        | 0.38      |               |
| 6  | 7.707             | 1733.689     | 67.953       | 8.9      | 10.1       | 0.37      |               |
| 7  | 9.040             | 14151.492    | 537.899      | 72.3     | 79.8       | 0.40      |               |
| 8  | 10.753            | 278.325      | 9.209        | 1.4      | 1.4        | 0.53      |               |
| 9  | 11.740            | 1473.713     | 15.782       | 7.5      | 2.3        | 1.53      |               |
| 10 | 15.560            | 295.103      | 2.248        | 1.5      | 0.3        | 2.42      |               |
| 11 | 18.827            | 984.683      | 17.554       | 5.0      | 2.6        | 0.84      |               |
|    | Total             | 19563.935    | 674.216      | 100.0    | 100.0      |           |               |

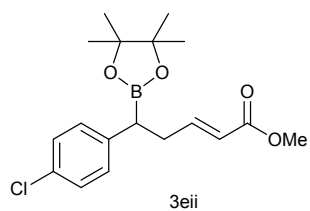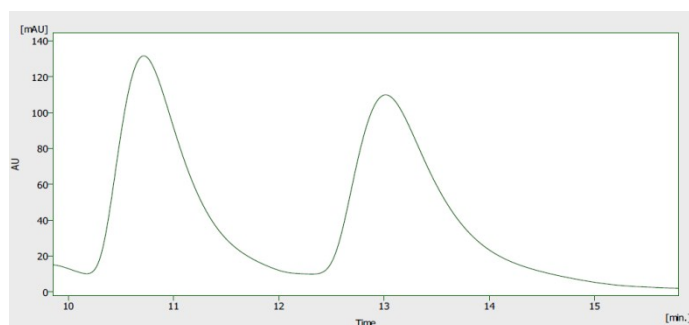

|    | Reten. Time [min] | Area [mAU.s] | Height [mAU] | Area [%] | Height [%] | W05 [min] | Compound Name |
|----|-------------------|--------------|--------------|----------|------------|-----------|---------------|
| 1  | 4.340             | 23.179       | 1.994        | 0.1      | 0.4        | 0.21      |               |
| 2  | 4.567             | 30.451       | 2.277        | 0.1      | 0.5        | 0.27      |               |
| 3  | 4.913             | 136.719      | 7.006        | 0.6      | 1.5        | 0.30      |               |
| 4  | 6.487             | 2036.963     | 60.083       | 8.5      | 13.0       | 0.53      |               |
| 5  | 7.813             | 1469.235     | 23.349       | 6.2      | 5.1        | 1.11      |               |
| 6  | 9.133             | 1257.949     | 37.276       | 5.3      | 8.1        | 0.57      |               |
| 7  | 9.800             | 532.680      | 16.758       | 2.2      | 3.6        | 0.59      |               |
| 8  | 10.720            | 6790.915     | 133.139      | 28.5     | 28.8       | 0.72      |               |
| 9  | 13.013            | 7253.222     | 111.483      | 30.4     | 24.1       | 0.88      |               |
| 10 | 16.573            | 4331.460     | 68.344       | 18.2     | 14.8       | 0.91      |               |
|    | Total             | 23862.772    | 461.709      | 100.0    | 100.0      |           |               |

Optimised asymmetric reaction (THF/MeOH, (*R*)-DM-BINAP as ligand)

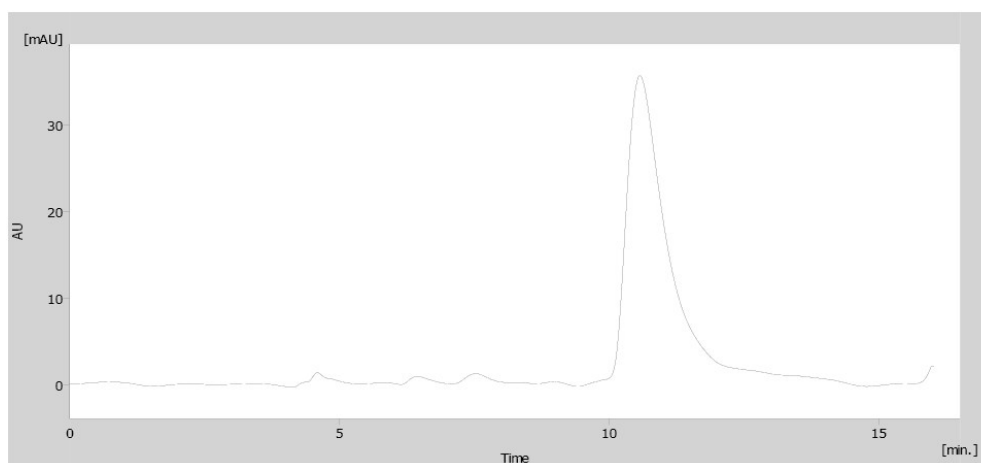

|   | Reten. Time [min] | Area [mAU.s] | Height [mAU] | Area [%] | Height [%] | W05 [min] | Compound Name |
|---|-------------------|--------------|--------------|----------|------------|-----------|---------------|
| 1 | 10.567            | 1801.379     | 35.358       | 100.0    | 100.0      | 0.74      |               |
|   | Total             | 1801.379     | 35.358       | 100.0    | 100.0      |           |               |

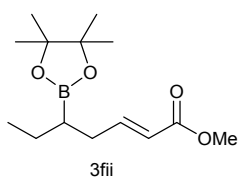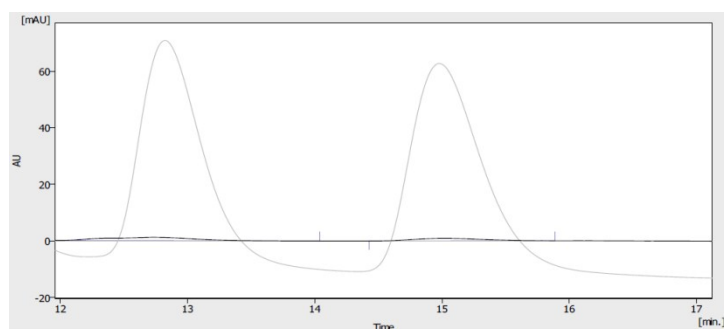



|   | Reten. Time [min] | Area [mAU.s] | Height [mAU] | Area [%] | Height [%] | W05 [min] | Compound Name |
|---|-------------------|--------------|--------------|----------|------------|-----------|---------------|
| 1 | 9.320             | 215.216      | 6.403        | 2.9      | 3.5        | 0.44      |               |
| 2 | 10.540            | 277.863      | 6.489        | 3.7      | 3.5        | 0.81      |               |
| 3 | 11.680            | 467.868      | 10.517       | 6.3      | 5.7        | 0.79      |               |
| 4 | 12.820            | 3049.955     | 82.030       | 40.9     | 44.4       | 0.54      |               |
| 5 | 14.980            | 3173.051     | 75.331       | 42.6     | 40.8       | 0.62      |               |
| 6 | 20.967            | 86.455       | 1.939        | 1.2      | 1.0        | 0.67      |               |
| 7 | 22.820            | 185.952      | 2.142        | 2.5      | 1.2        | 0.84      |               |
|   | Total             | 7456.360     | 184.851      | 100.0    | 100.0      |           |               |

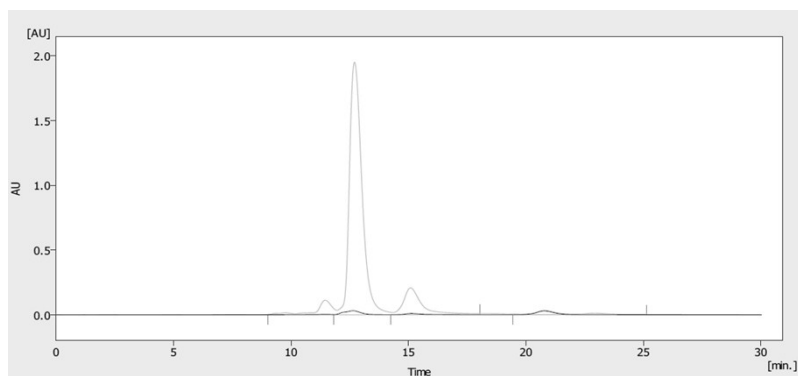

|    | Reten. Time [min] | Area [mAU.s] | Height [mAU] | Area [%] | Height [%] | W05 [min] | Compound Name |
|----|-------------------|--------------|--------------|----------|------------|-----------|---------------|
| 1  | 2.207             | 44.382       | 0.567        | 0.0      | 0.0        | 1.81      |               |
| 2  | 7.587             | 44.971       | 0.608        | 0.0      | 0.0        | 0.97      |               |
| 3  | 9.767             | 788.026      | 16.016       | 0.9      | 0.7        | 0.99      |               |
| 4  | 10.833            | 592.012      | 15.608       | 0.6      | 0.7        | 0.72      |               |
| 5  | 11.460            | 3956.487     | 112.525      | 4.3      | 4.8        | 0.57      |               |
| 6  | 12.707            | 72404.547    | 1950.740     | 78.2     | 82.9       | 0.56      |               |
| 7  | 15.087            | 11400.206    | 207.151      | 12.3     | 8.8        | 0.70      |               |
| 8  | 18.260            | 785.413      | 8.348        | 0.8      | 0.4        | 2.02      |               |
| 9  | 20.807            | 1743.984     | 31.305       | 1.9      | 1.3        | 0.81      |               |
| 10 | 22.933            | 816.927      | 10.153       | 0.9      | 0.4        | 1.19      |               |
|    | Total             | 92576.954    | 2353.022     | 100.0    | 100.0      |           |               |

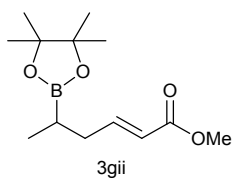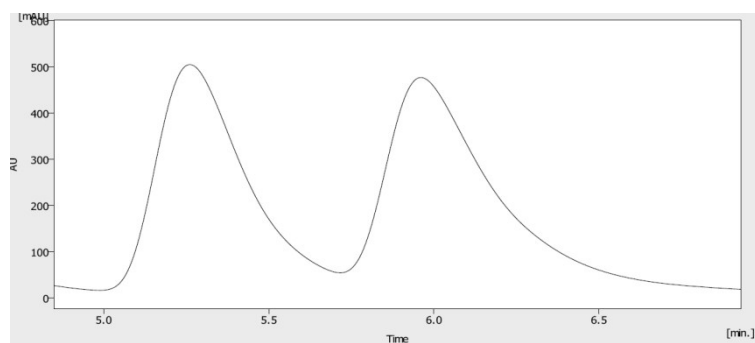

|    | Reten. Time [min] | Area [mAU.s] | Height [mAU] | Area [%] | Height [%] | W05 [min] | Compound Name |
|----|-------------------|--------------|--------------|----------|------------|-----------|---------------|
| 1  | 0.647             | 115.671      | 3.268        | 0.4      | 0.2        | 0.61      |               |
| 2  | 1.720             | 134.089      | 3.574        | 0.4      | 0.3        | 0.64      |               |
| 3  | 2.780             | 126.562      | 3.341        | 0.4      | 0.2        | 0.65      |               |
| 4  | 3.713             | 120.668      | 6.485        | 0.4      | 0.5        | 0.29      |               |
| 5  | 4.607             | 2291.768     | 82.083       | 7.1      | 6.1        | 0.39      |               |
| 6  | 5.260             | 11425.595    | 580.508      | 35.2     | 43.3       | 0.30      |               |
| 7  | 5.960             | 13810.201    | 549.013      | 42.6     | 41.0       | 0.35      |               |
| 8  | 7.220             | 284.934      | 20.056       | 0.9      | 1.5        | 0.24      |               |
| 9  | 7.620             | 1052.632     | 30.417       | 3.2      | 2.3        | 0.65      |               |
| 10 | 8.300             | 740.600      | 13.110       | 2.3      | 1.0        | 1.07      |               |
| 11 | 10.227            | 258.751      | 5.105        | 0.8      | 0.4        | 0.90      |               |
| 12 | 11.607            | 222.092      | 5.191        | 0.7      | 0.4        | 0.77      |               |
| 13 | 12.387            | 296.516      | 5.425        | 0.9      | 0.4        | 1.00      |               |
| 14 | 13.380            | 264.268      | 4.795        | 0.8      | 0.4        | 0.98      |               |
| 15 | 14.553            | 191.145      | 4.022        | 0.6      | 0.3        | 0.94      |               |
| 16 | 15.660            | 285.354      | 5.723        | 0.9      | 0.4        | 0.96      |               |
| 17 | 16.700            | 276.380      | 5.480        | 0.9      | 0.4        | 0.98      |               |
| 18 | 17.787            | 271.215      | 5.712        | 0.8      | 0.4        | 0.84      |               |
| 19 | 18.820            | 196.149      | 4.439        | 0.6      | 0.3        | 0.82      |               |
| 20 | 19.967            | 81.873       | 2.554        | 0.3      | 0.2        | 0.53      |               |
|    | Total             | 32446.463    | 1340.300     | 100.0    | 100.0      |           |               |

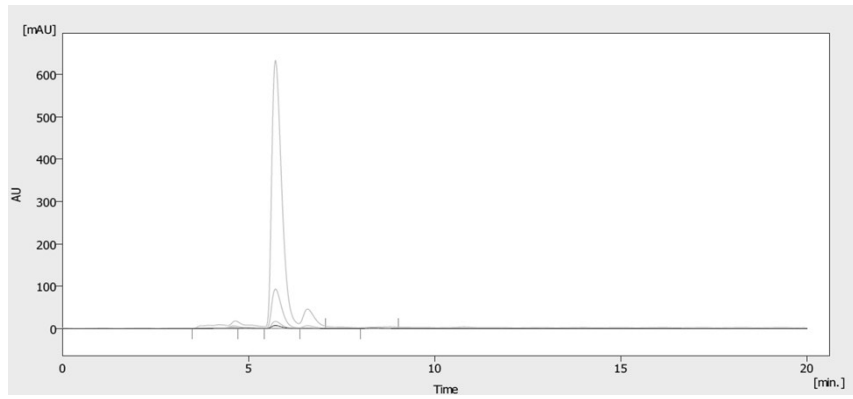

|   | Reten. Time [min] | Area [mAU.s] | Height [mAU] | Area [%] | Height [%] | W05 [min] | Compound Name |
|---|-------------------|--------------|--------------|----------|------------|-----------|---------------|
| 1 | 4.633             | 22.407       | 0.696        | 9.9      | 6.5        | 0.31      |               |
| 2 | 4.900             | 28.343       | 1.251        | 12.5     | 11.7       | 0.38      |               |
| 3 | 5.727             | 142.493      | 7.400        | 63.1     | 69.0       | 0.30      |               |
| 4 | 6.567             | 10.686       | 0.512        | 4.7      | 4.8        | 0.34      |               |
| 5 | 8.353             | 22.039       | 0.870        | 9.8      | 8.1        | 0.41      |               |
|   | Total             | 225.968      | 10.729       | 100.0    | 100.0      |           |               |

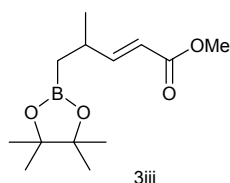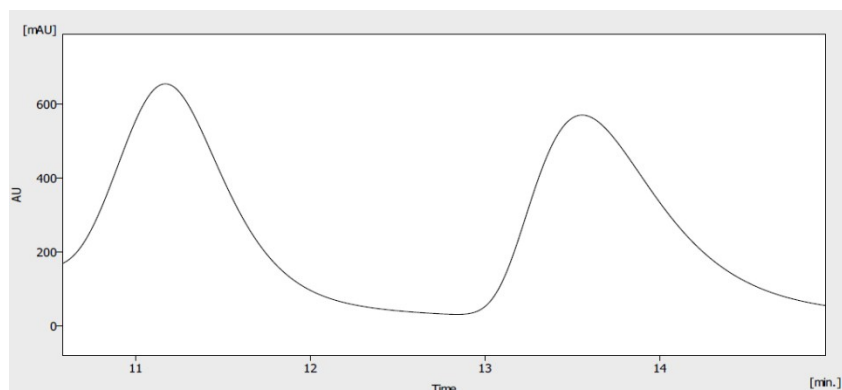

|   | Reten. Time [min] | Area [mAU.s] | Height [mAU] | Area [%] | Height [%] | W05 [min] | Compound Name |
|---|-------------------|--------------|--------------|----------|------------|-----------|---------------|
| 1 | 6.933             | 69.146       | 2.895        | 0.1      | 0.2        | 0.35      |               |
| 2 | 7.313             | 66.652       | 2.910        | 0.1      | 0.2        | 0.45      |               |
| 3 | 7.760             | 65.026       | 2.245        | 0.1      | 0.2        | 0.56      |               |
| 4 | 9.040             | 487.742      | 13.722       | 0.6      | 1.0        | 0.52      |               |
| 5 | 9.847             | 3435.056     | 138.793      | 4.2      | 9.7        | 0.40      |               |
| 6 | 11.173            | 39065.008    | 654.134      | 47.3     | 45.6       | 0.77      |               |
| 7 | 13.553            | 34625.812    | 569.474      | 41.9     | 39.7       | 0.86      |               |
| 8 | 16.980            | 3478.394     | 33.751       | 4.2      | 2.4        | 1.68      |               |
| 9 | 20.127            | 1366.296     | 17.889       | 1.7      | 1.2        | 1.11      |               |
|   | Total             | 82659.132    | 1435.813     | 100.0    | 100.0      |           |               |

### Stereochemical assignments

The relative stereochemistry of each chiral compound can be determined through the use of chiral HPLC (see above). In addition, the absolute stereochemistry of each product is assumed to be consistent with previous studies in our group,<sup>1</sup> whereby derivatisation and X-ray analysis allowed for the absolute stereochemistry of the respective compounds to be assigned. This was later supported by derivatisation of such compounds into known pharmaceuticals,<sup>2</sup> whereby the absolute stereochemistry was consistent with those independently verified by this work.<sup>1</sup>

### 3. <sup>1</sup>H, <sup>13</sup>C and <sup>11</sup>B NMR spectra

It is important to note that samples **6a-c**, **7b** and **7d** could not be purified due to their inherent instability. Therefore, the crude <sup>1</sup>H-NMR spectra of **6a-c**, **7b** and **7d** are listed below.

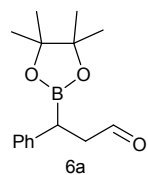

Crude <sup>1</sup>H-NMR showing the presence of **6a**

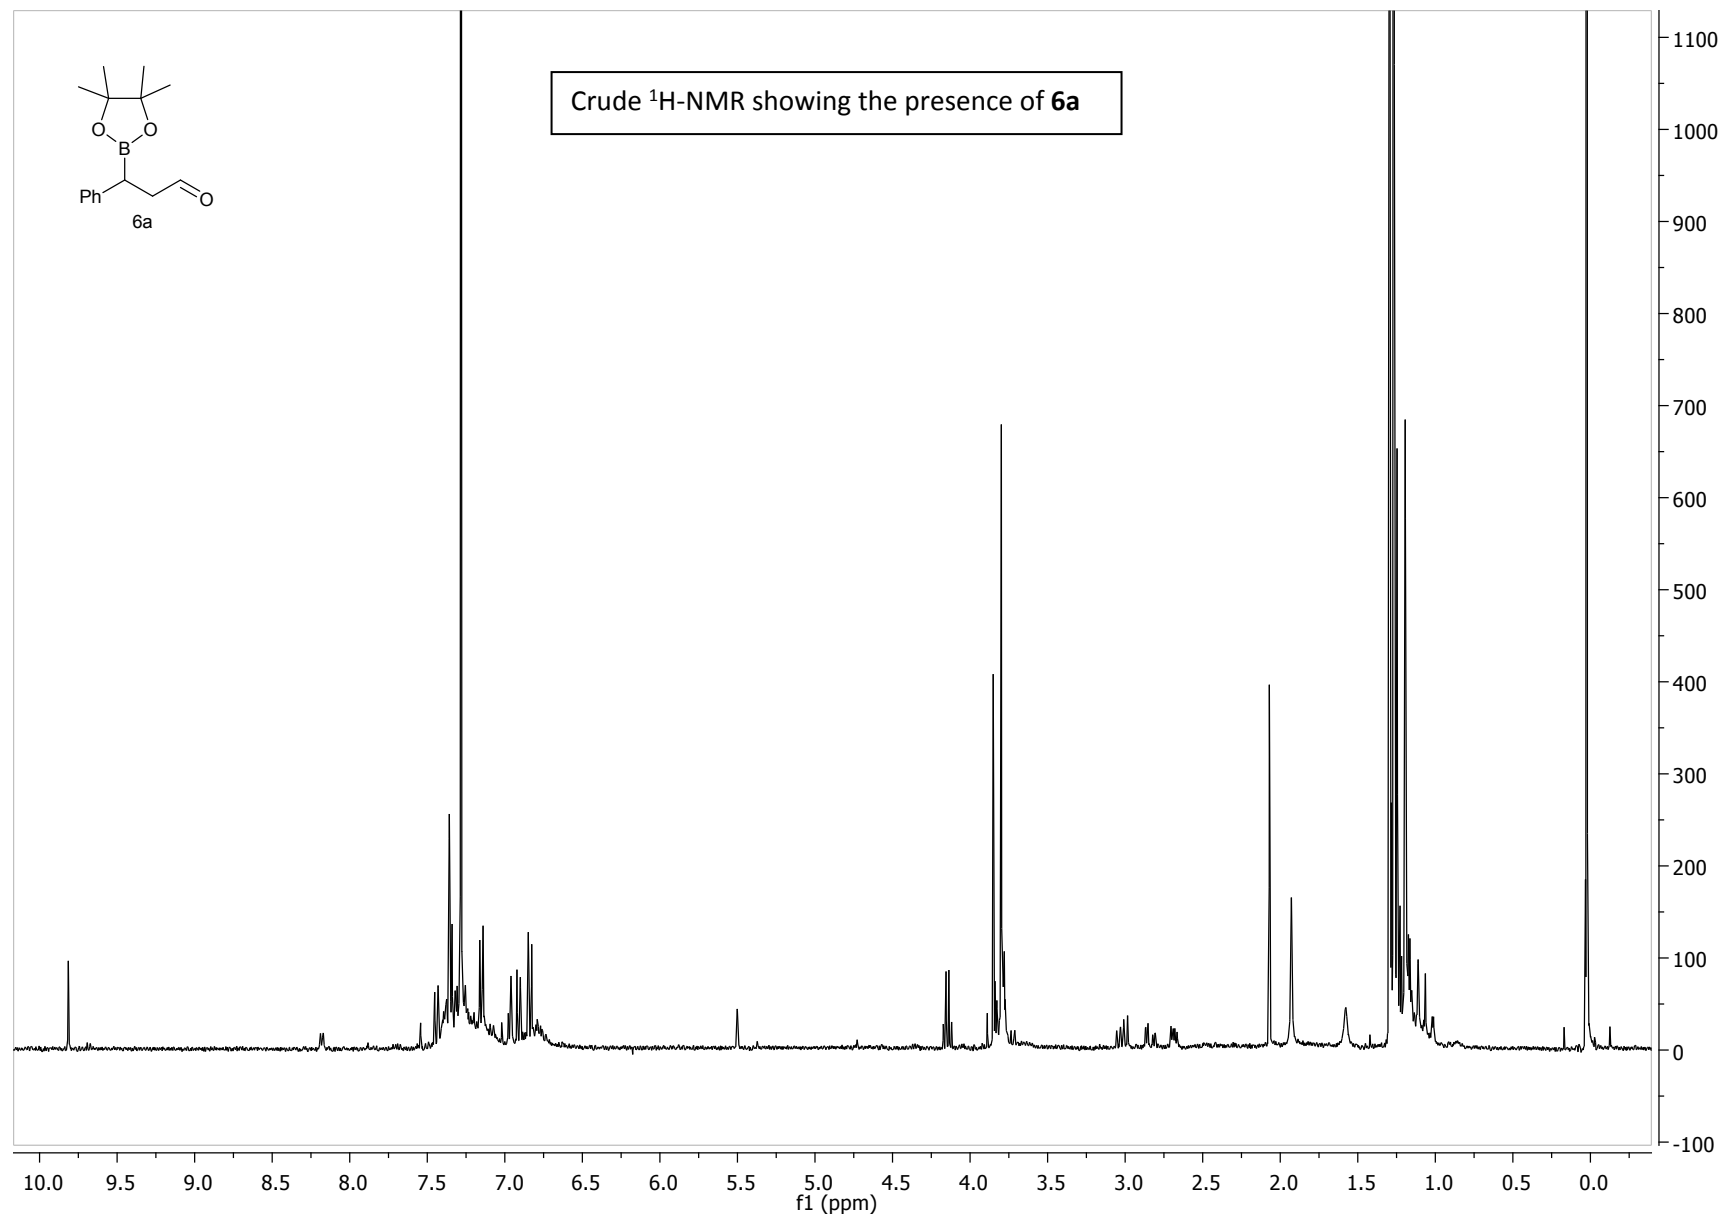

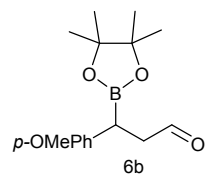

Crude <sup>1</sup>H-NMR showing the presence of **6b**

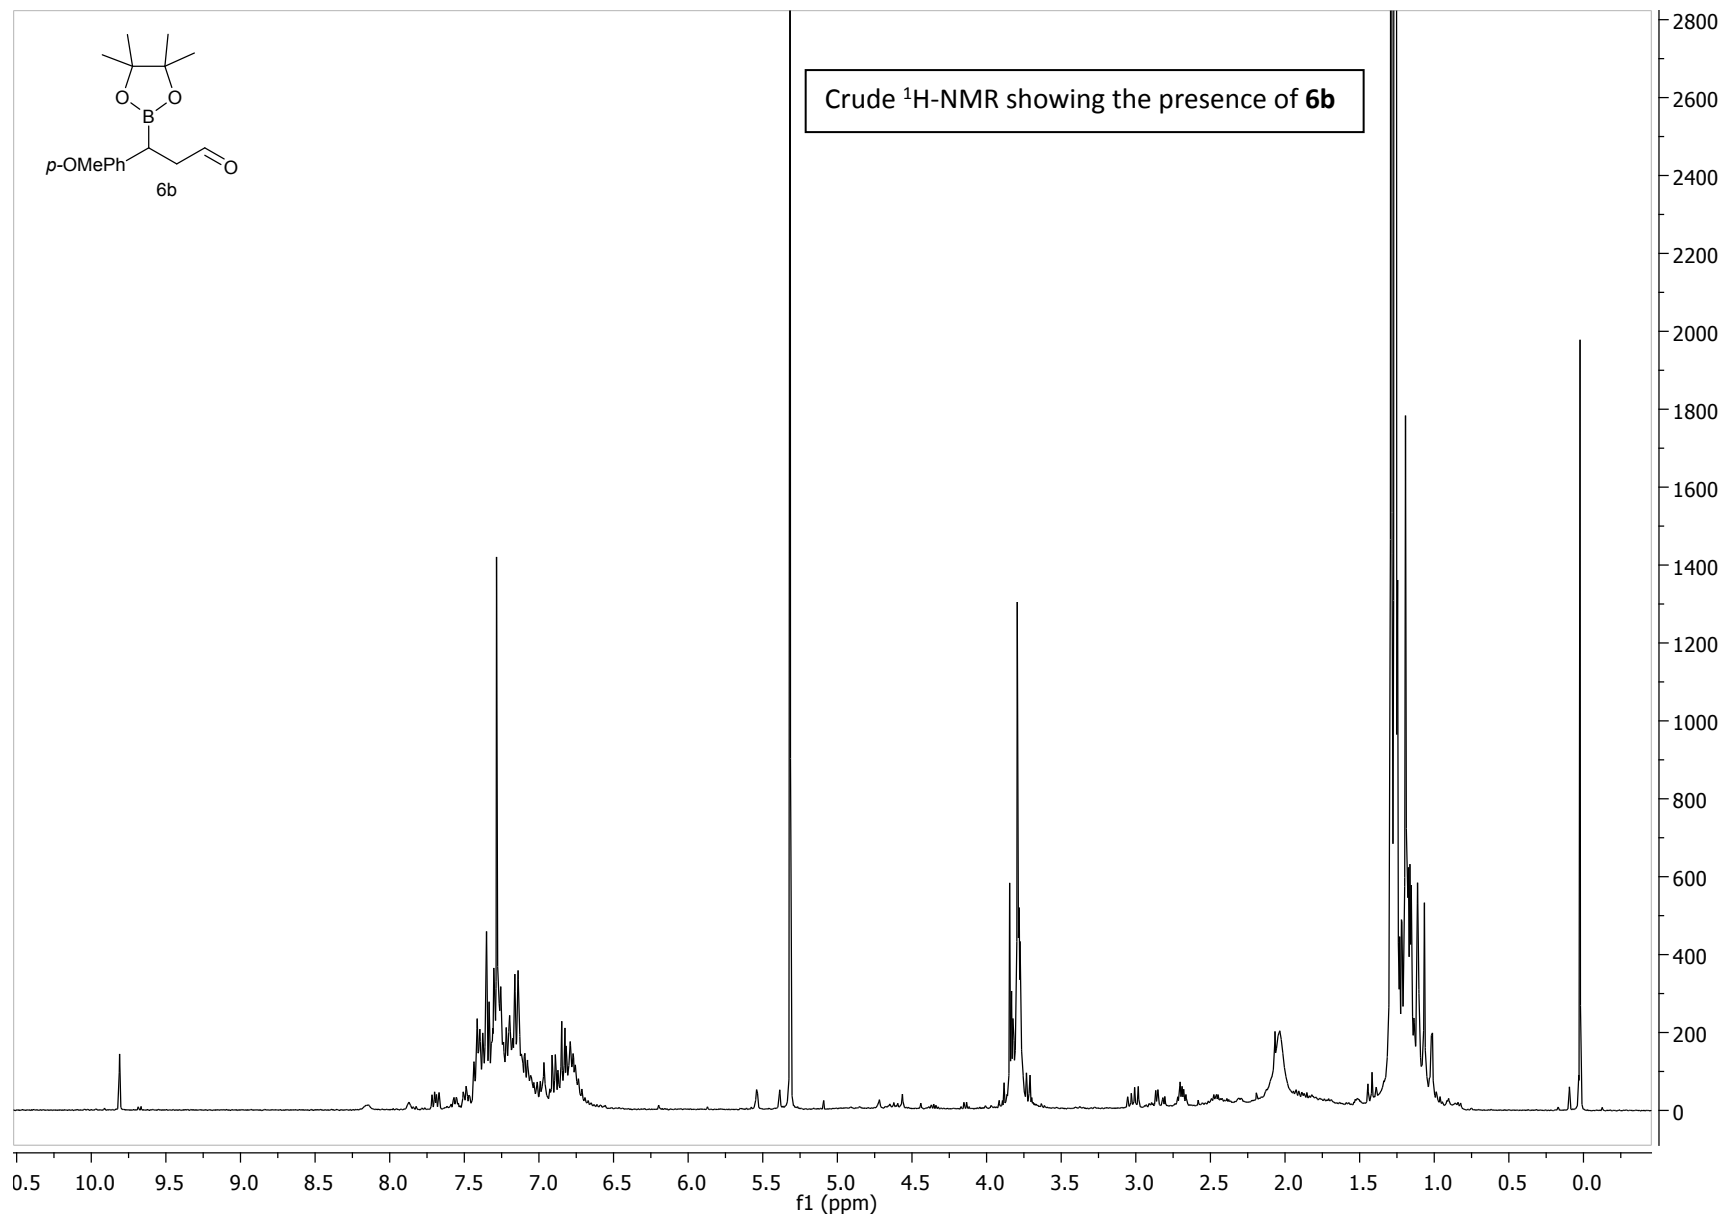

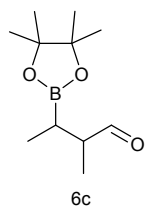

Crude <sup>1</sup>H-NMR showing the presence of 6c

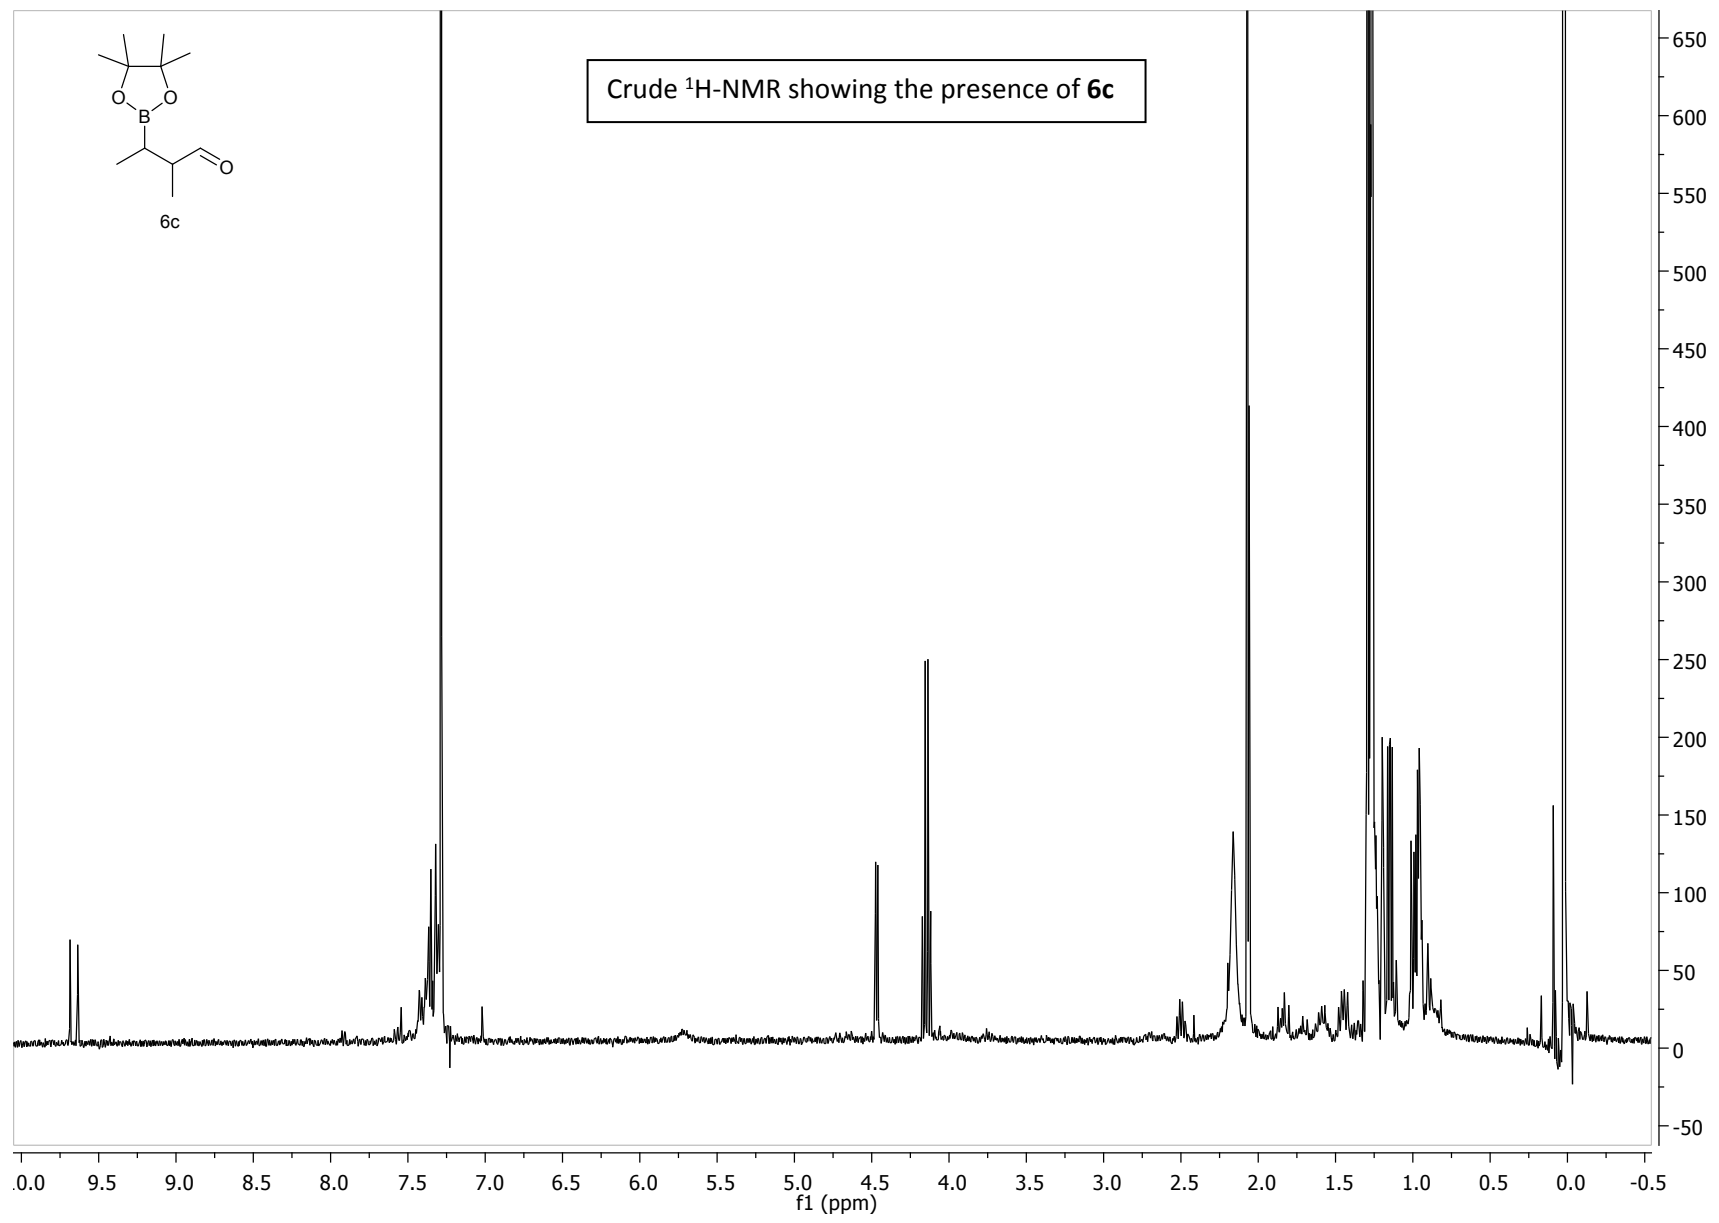

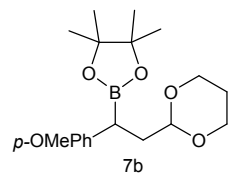

Crude <sup>1</sup>H-NMR showing the presence of **7b**

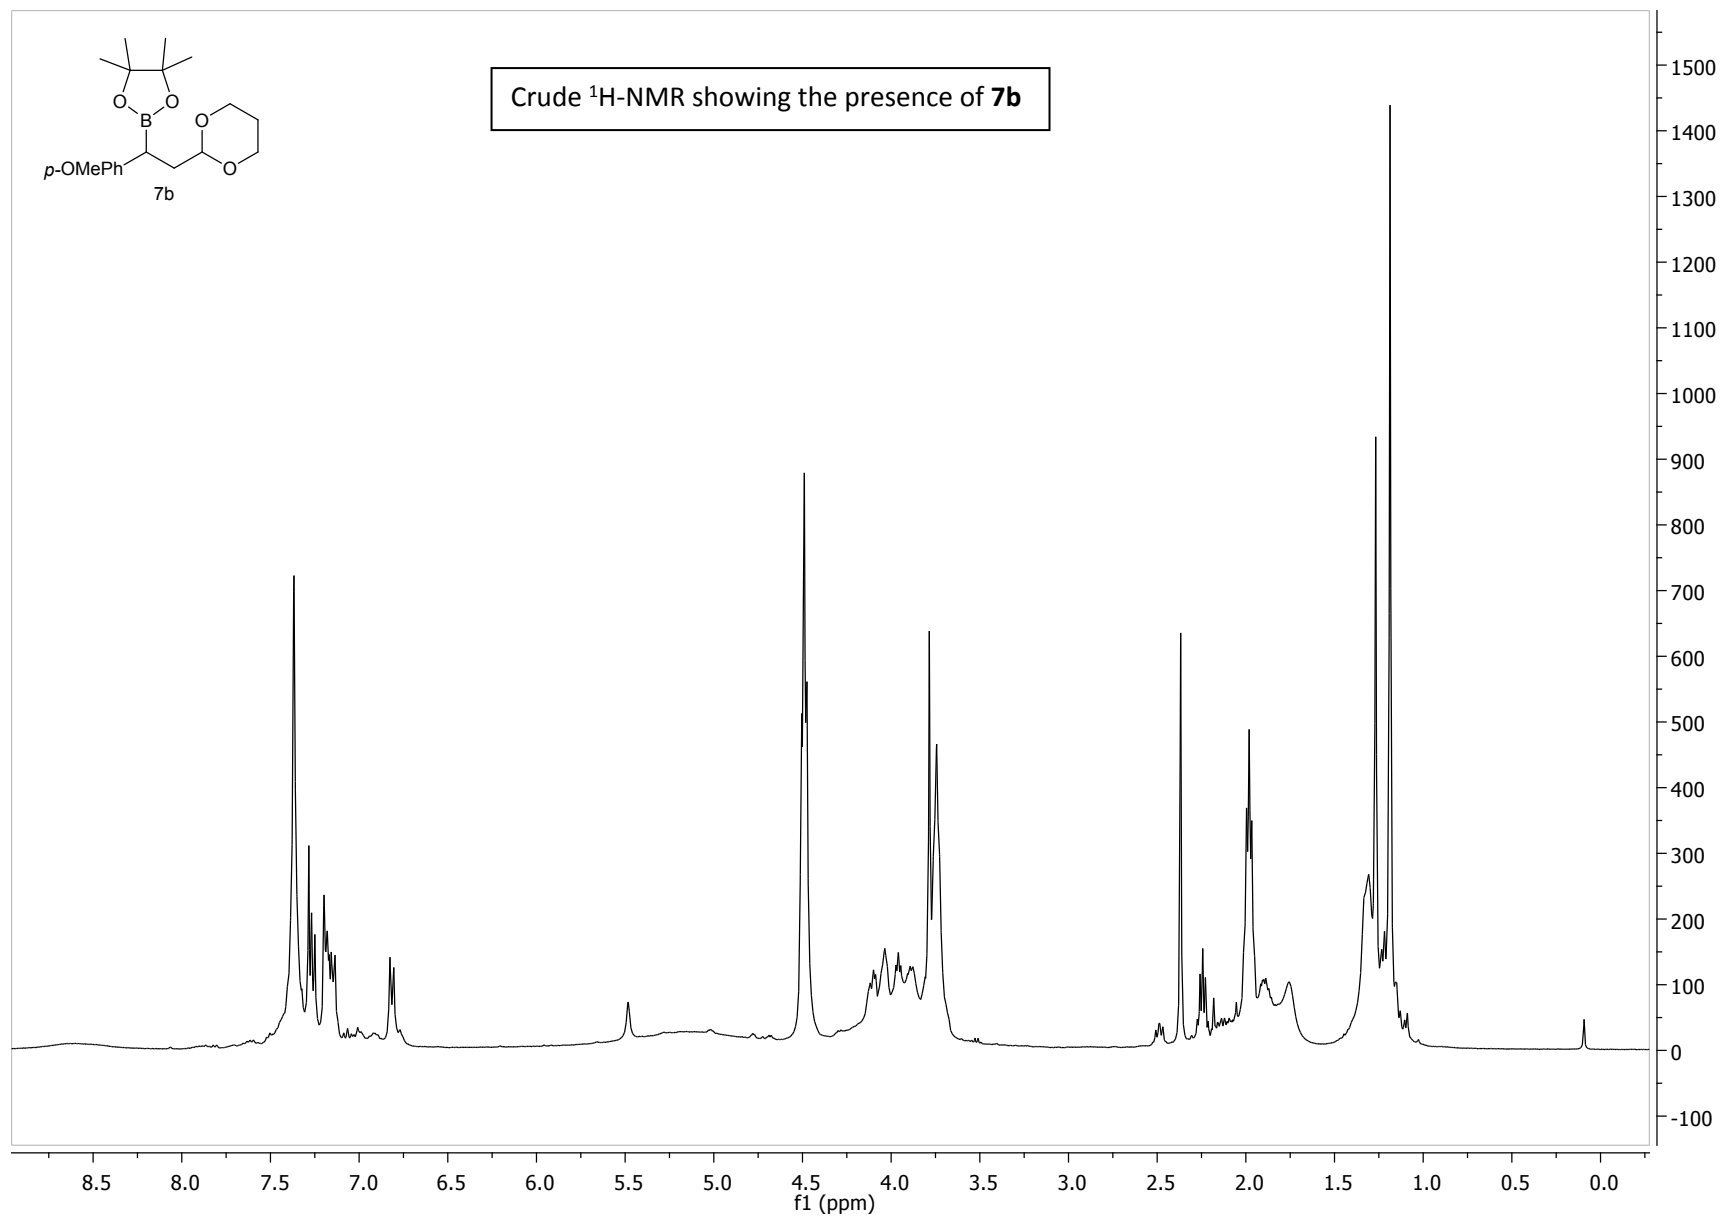

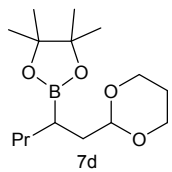

Crude <sup>1</sup>H-NMR showing the presence of **7d**

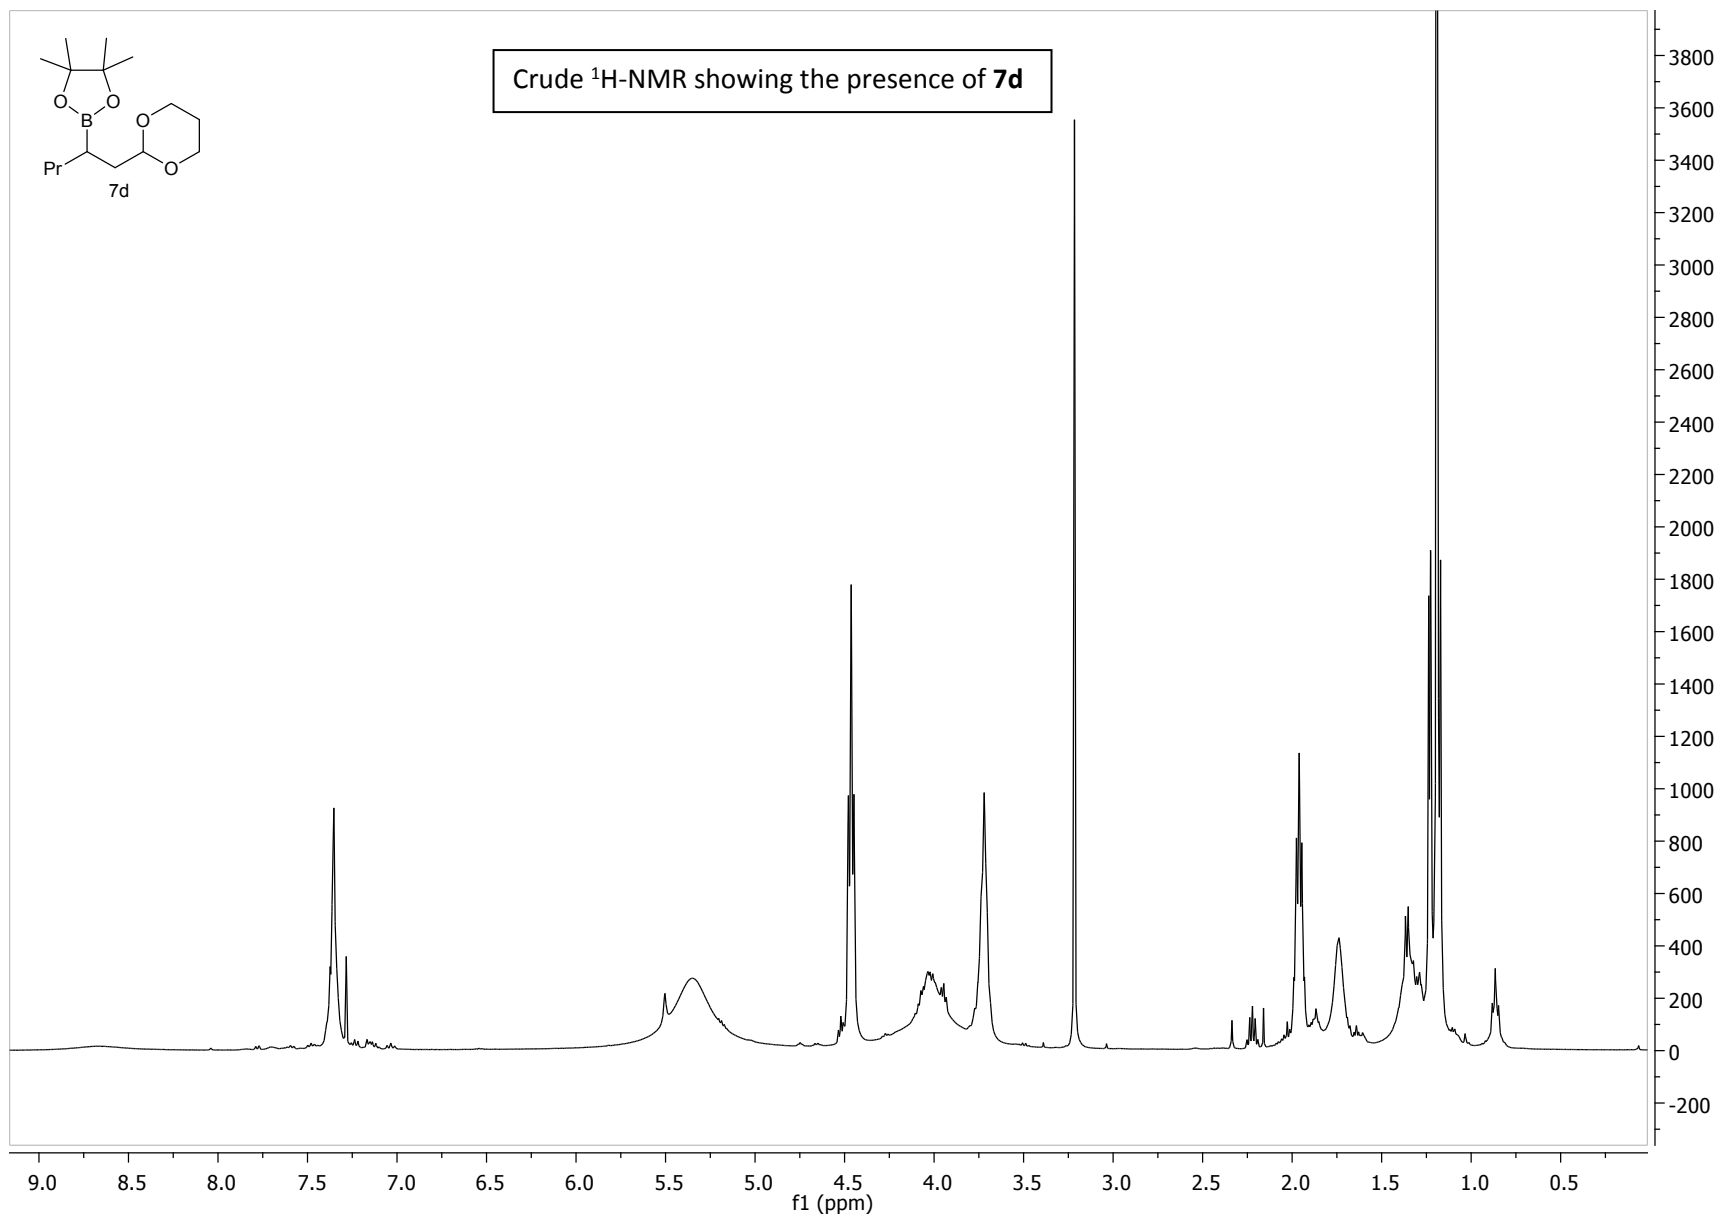



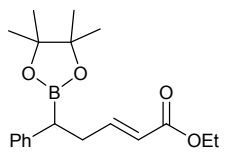

3ai

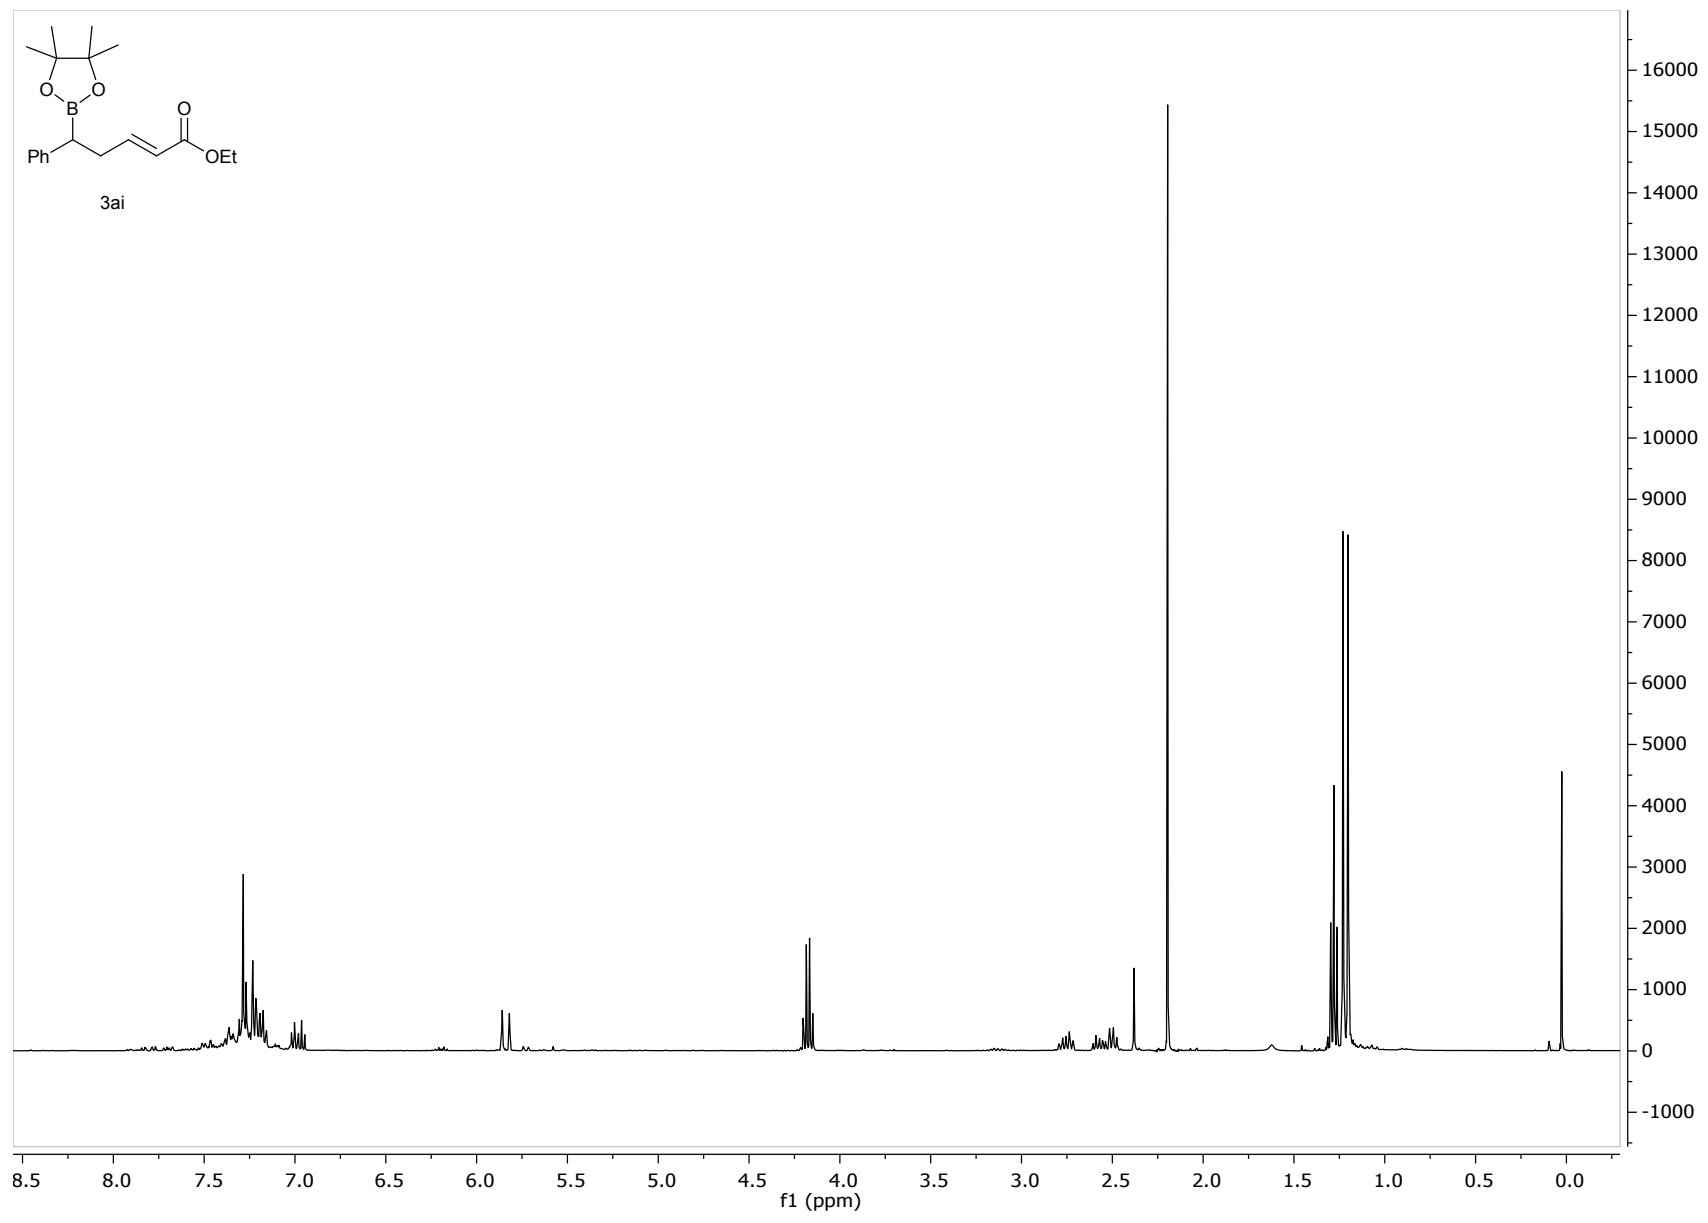

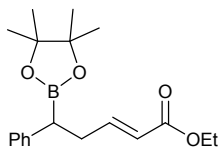

3ai

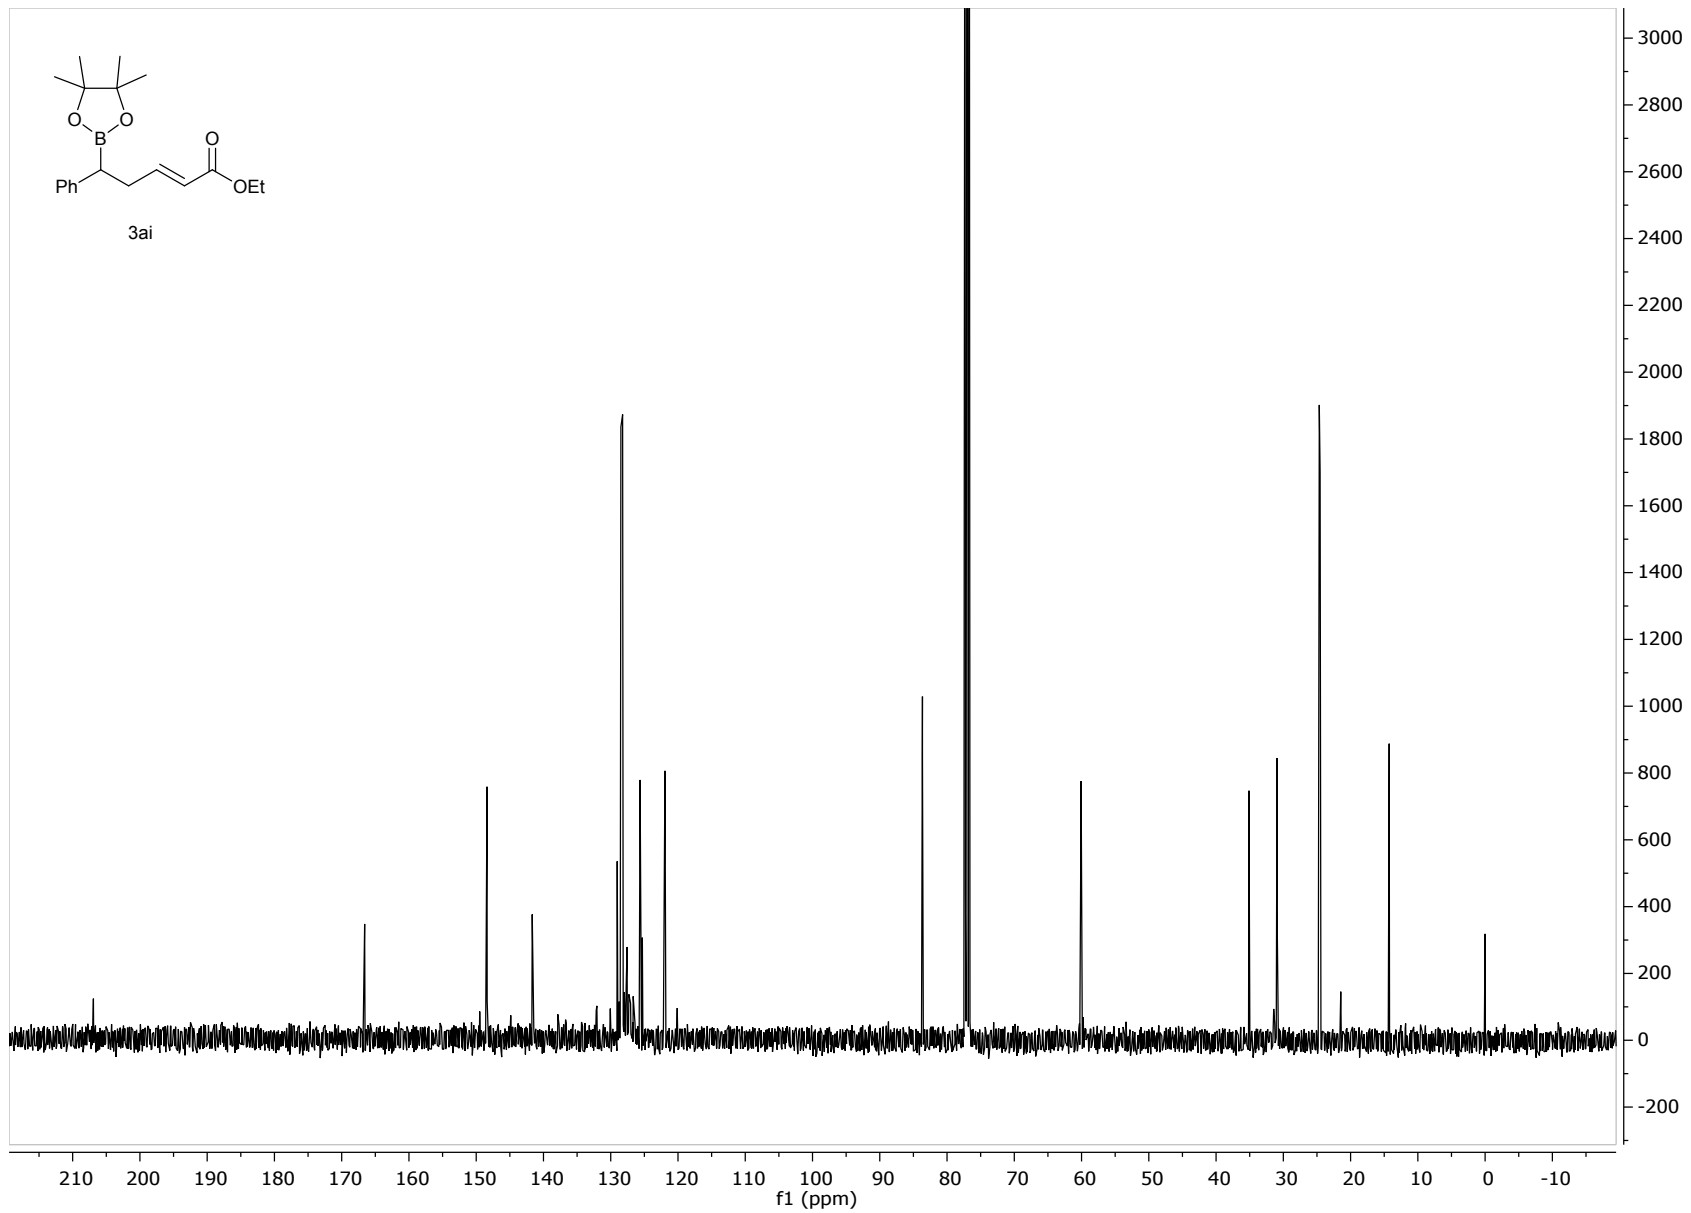

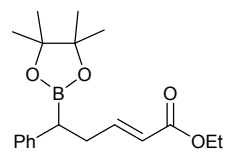

3ai

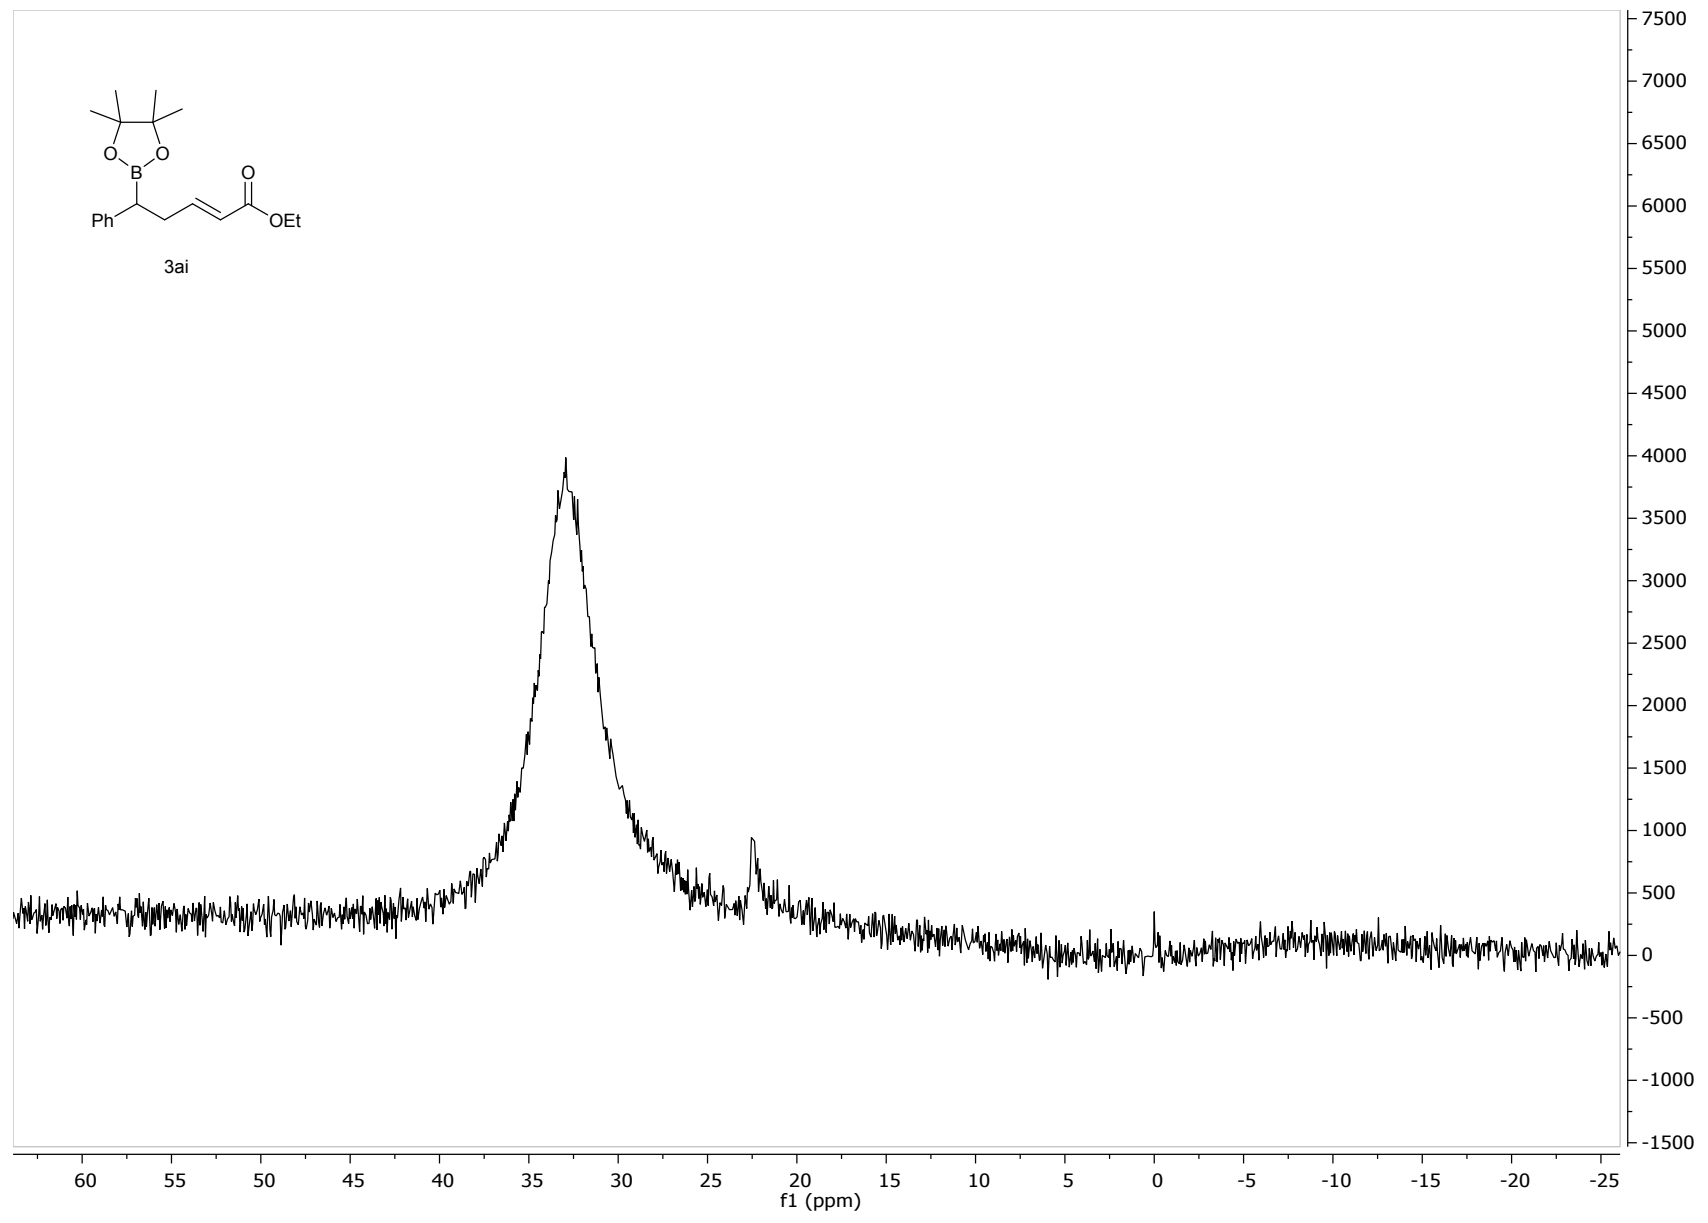

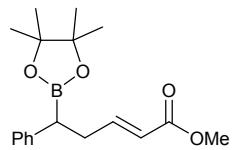

3aii

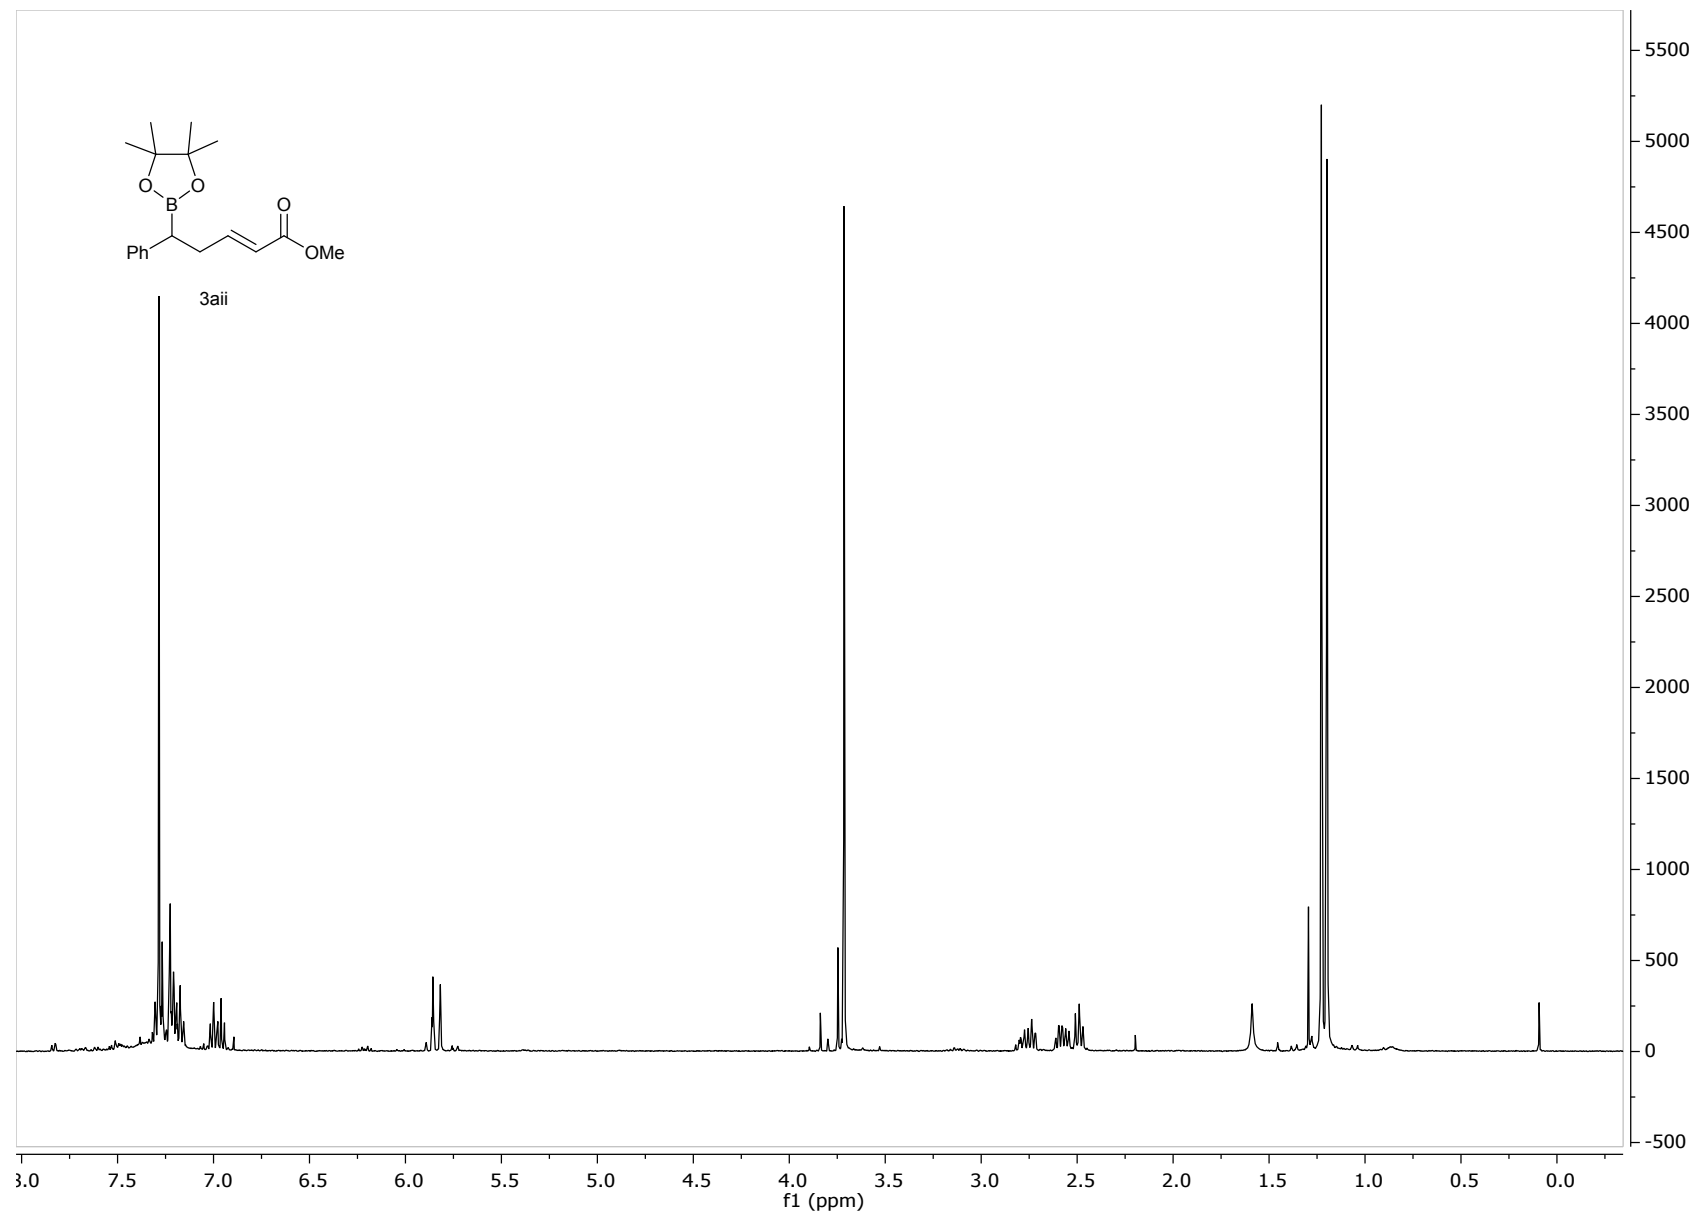

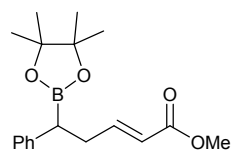

3a<sub>ii</sub>

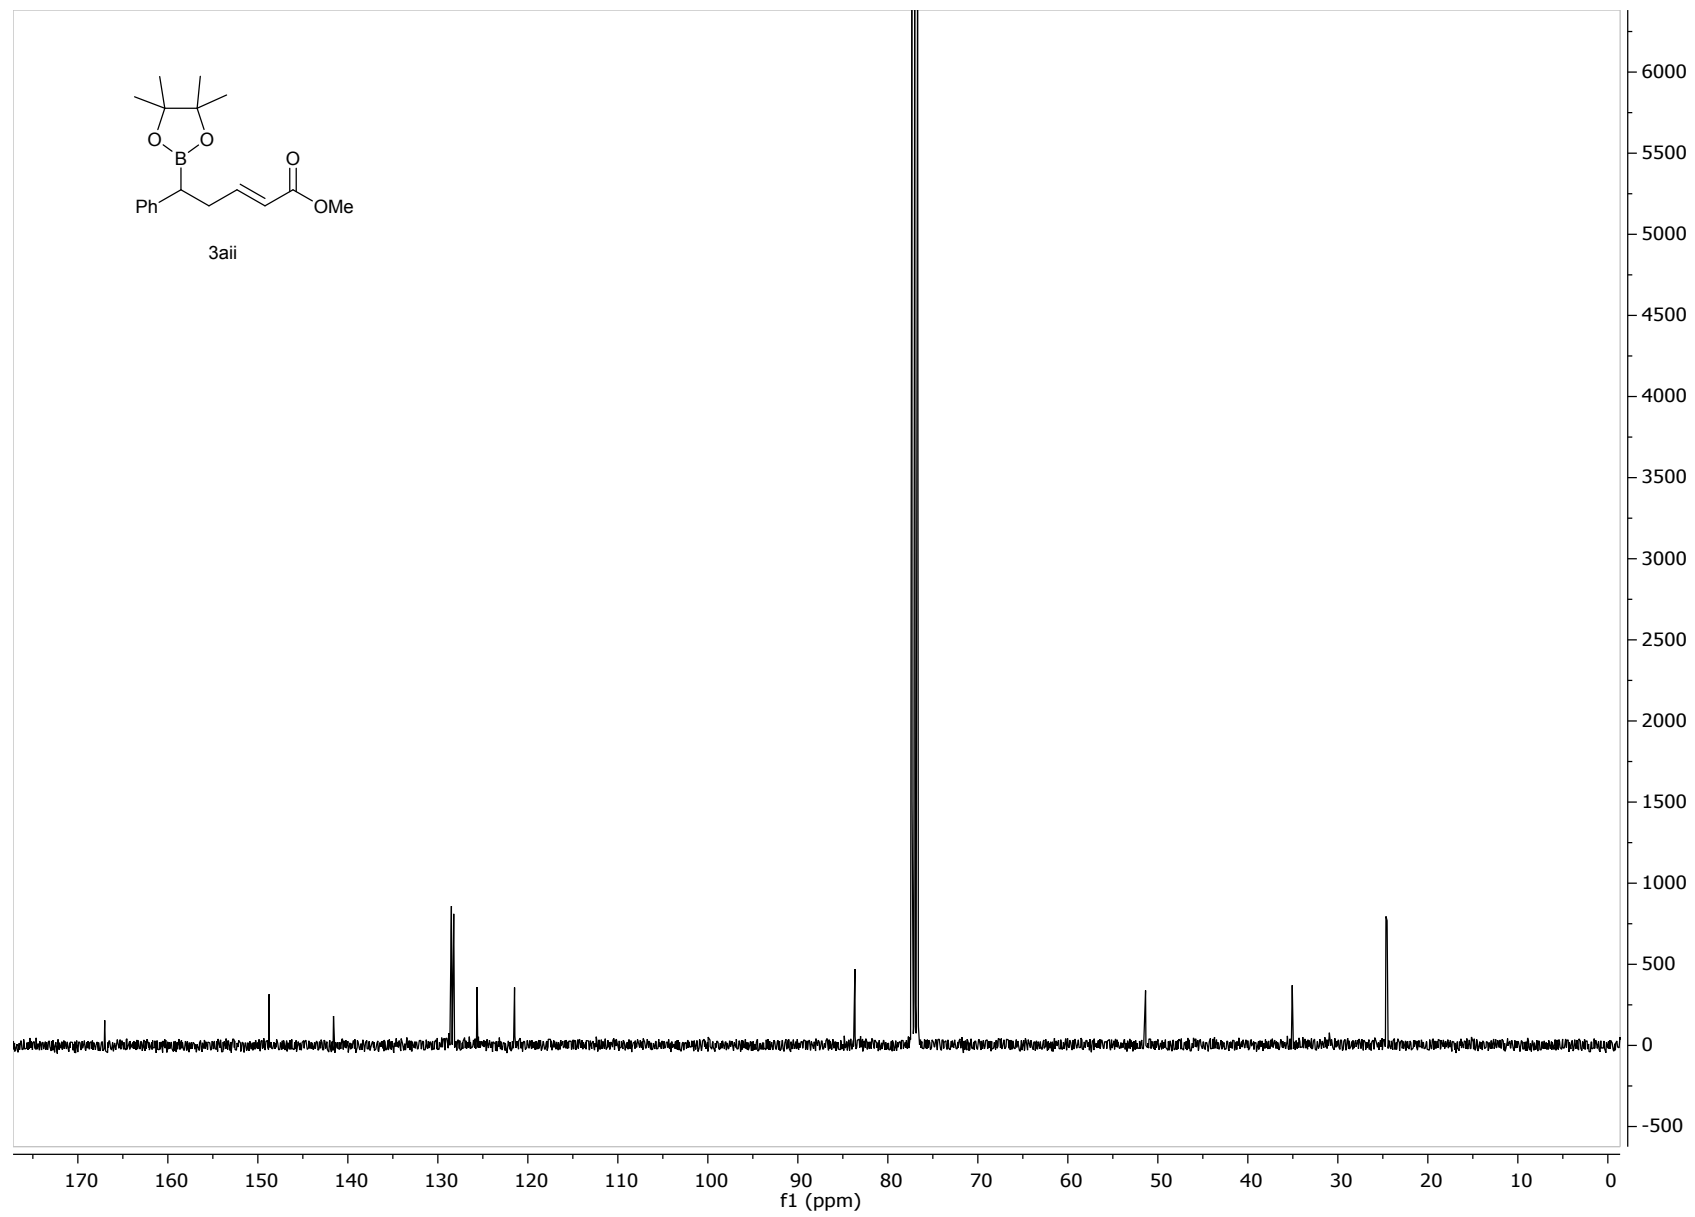

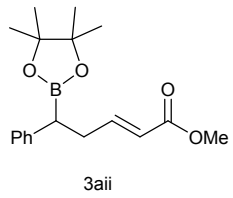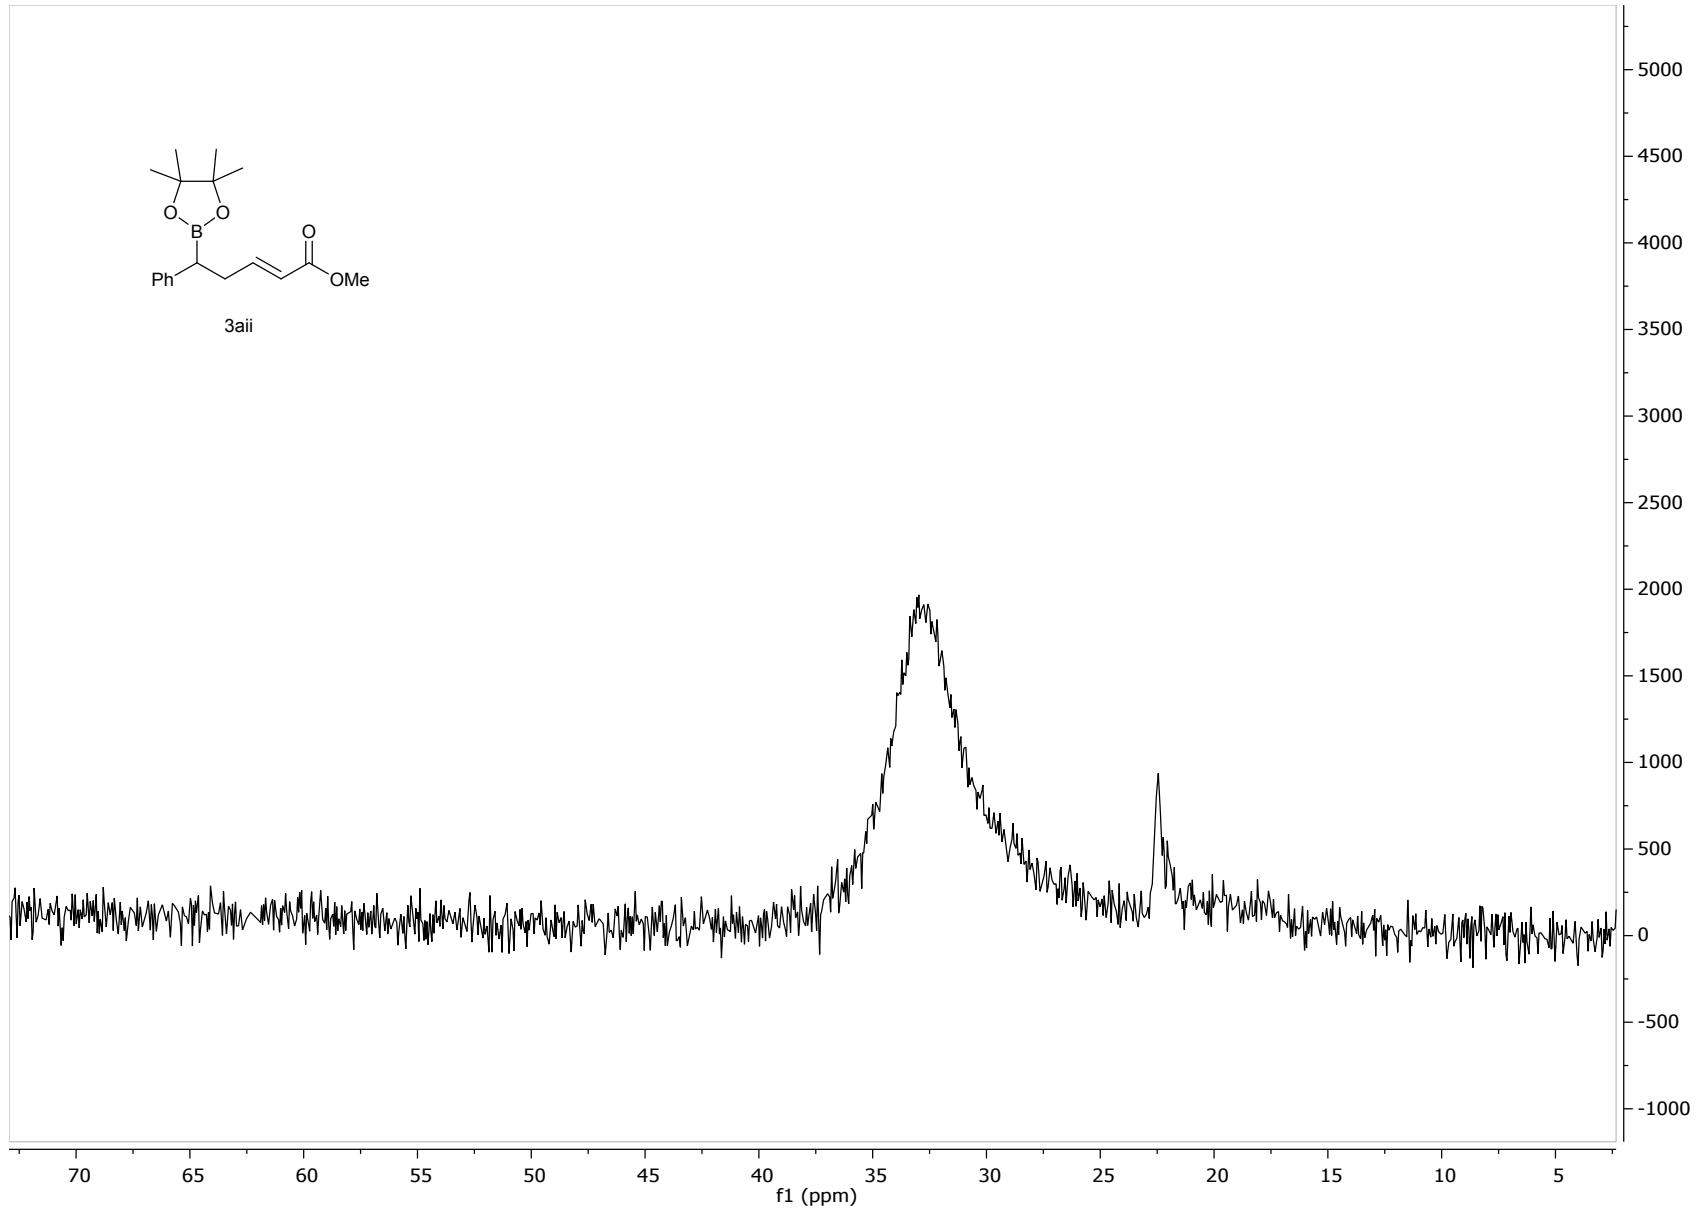

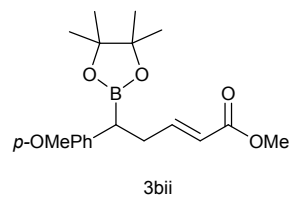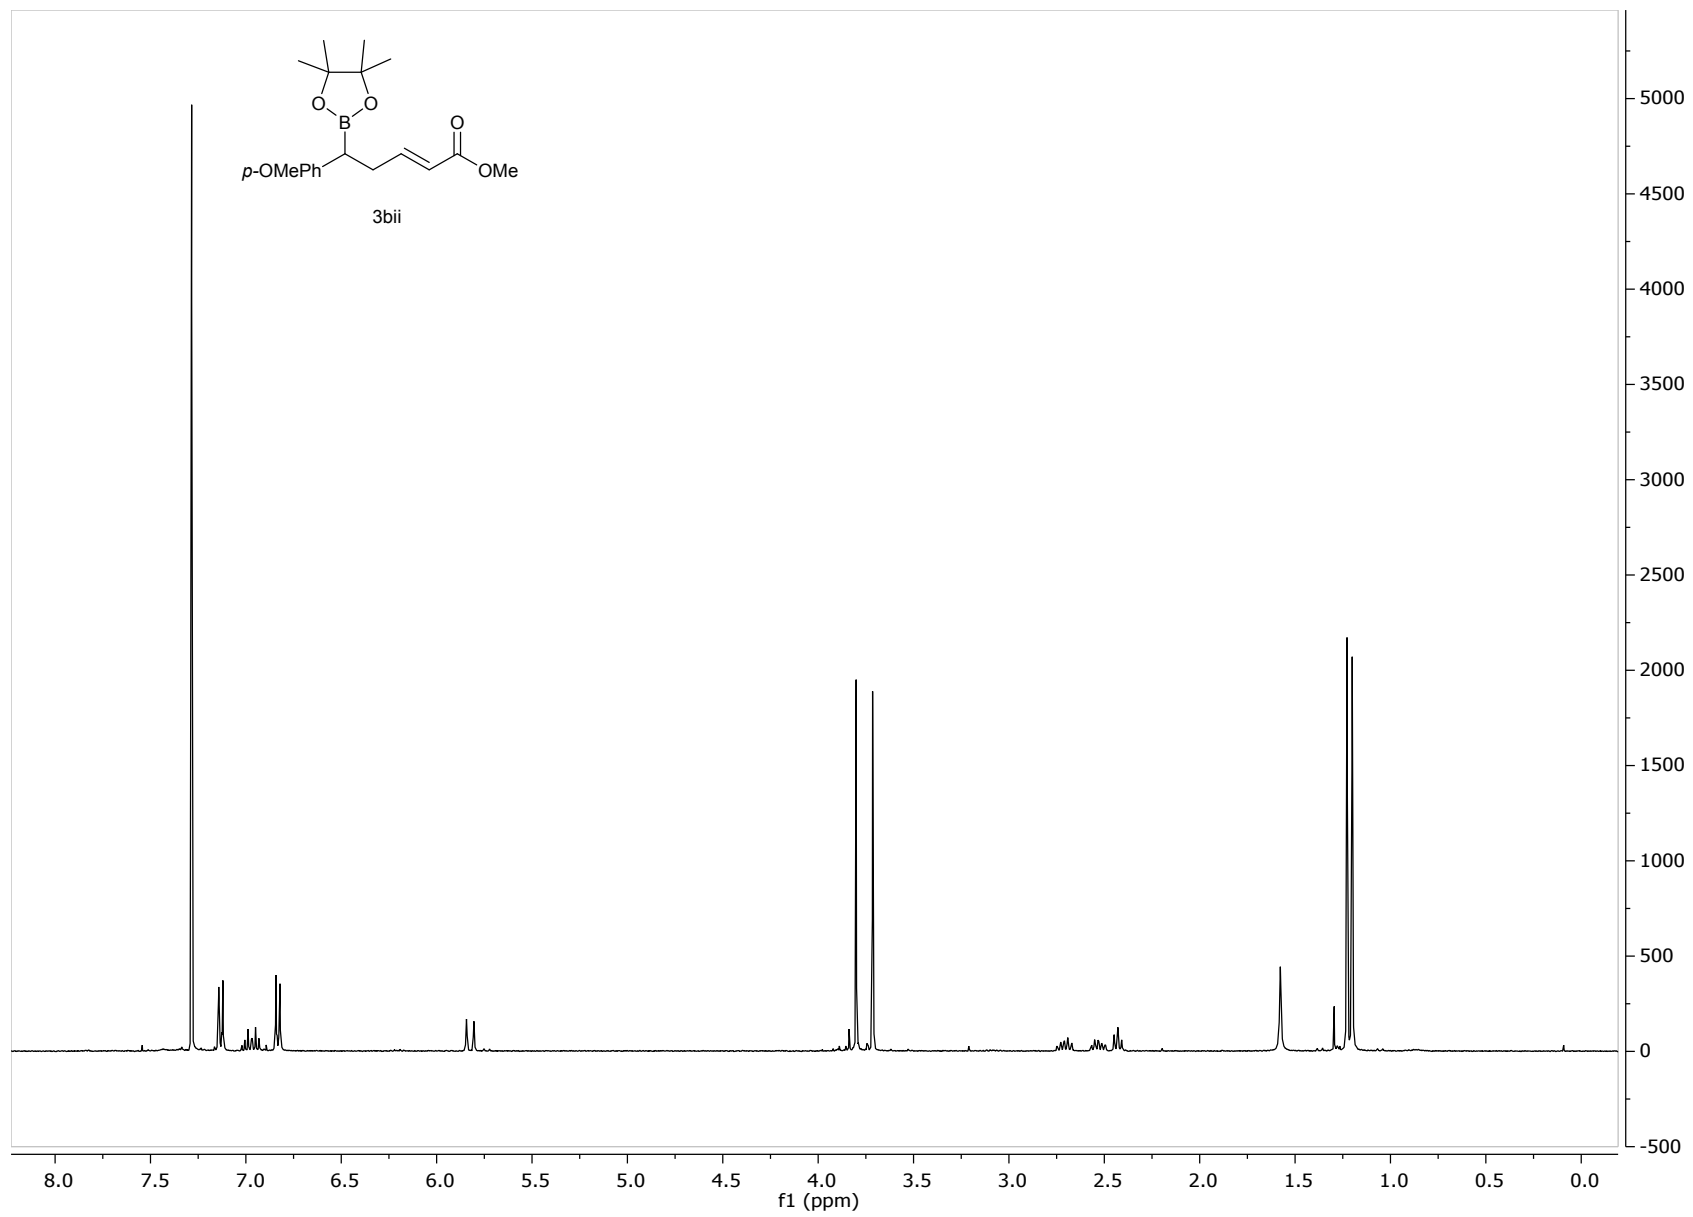

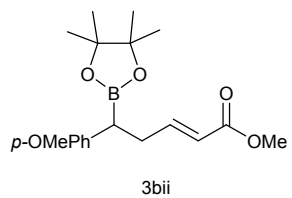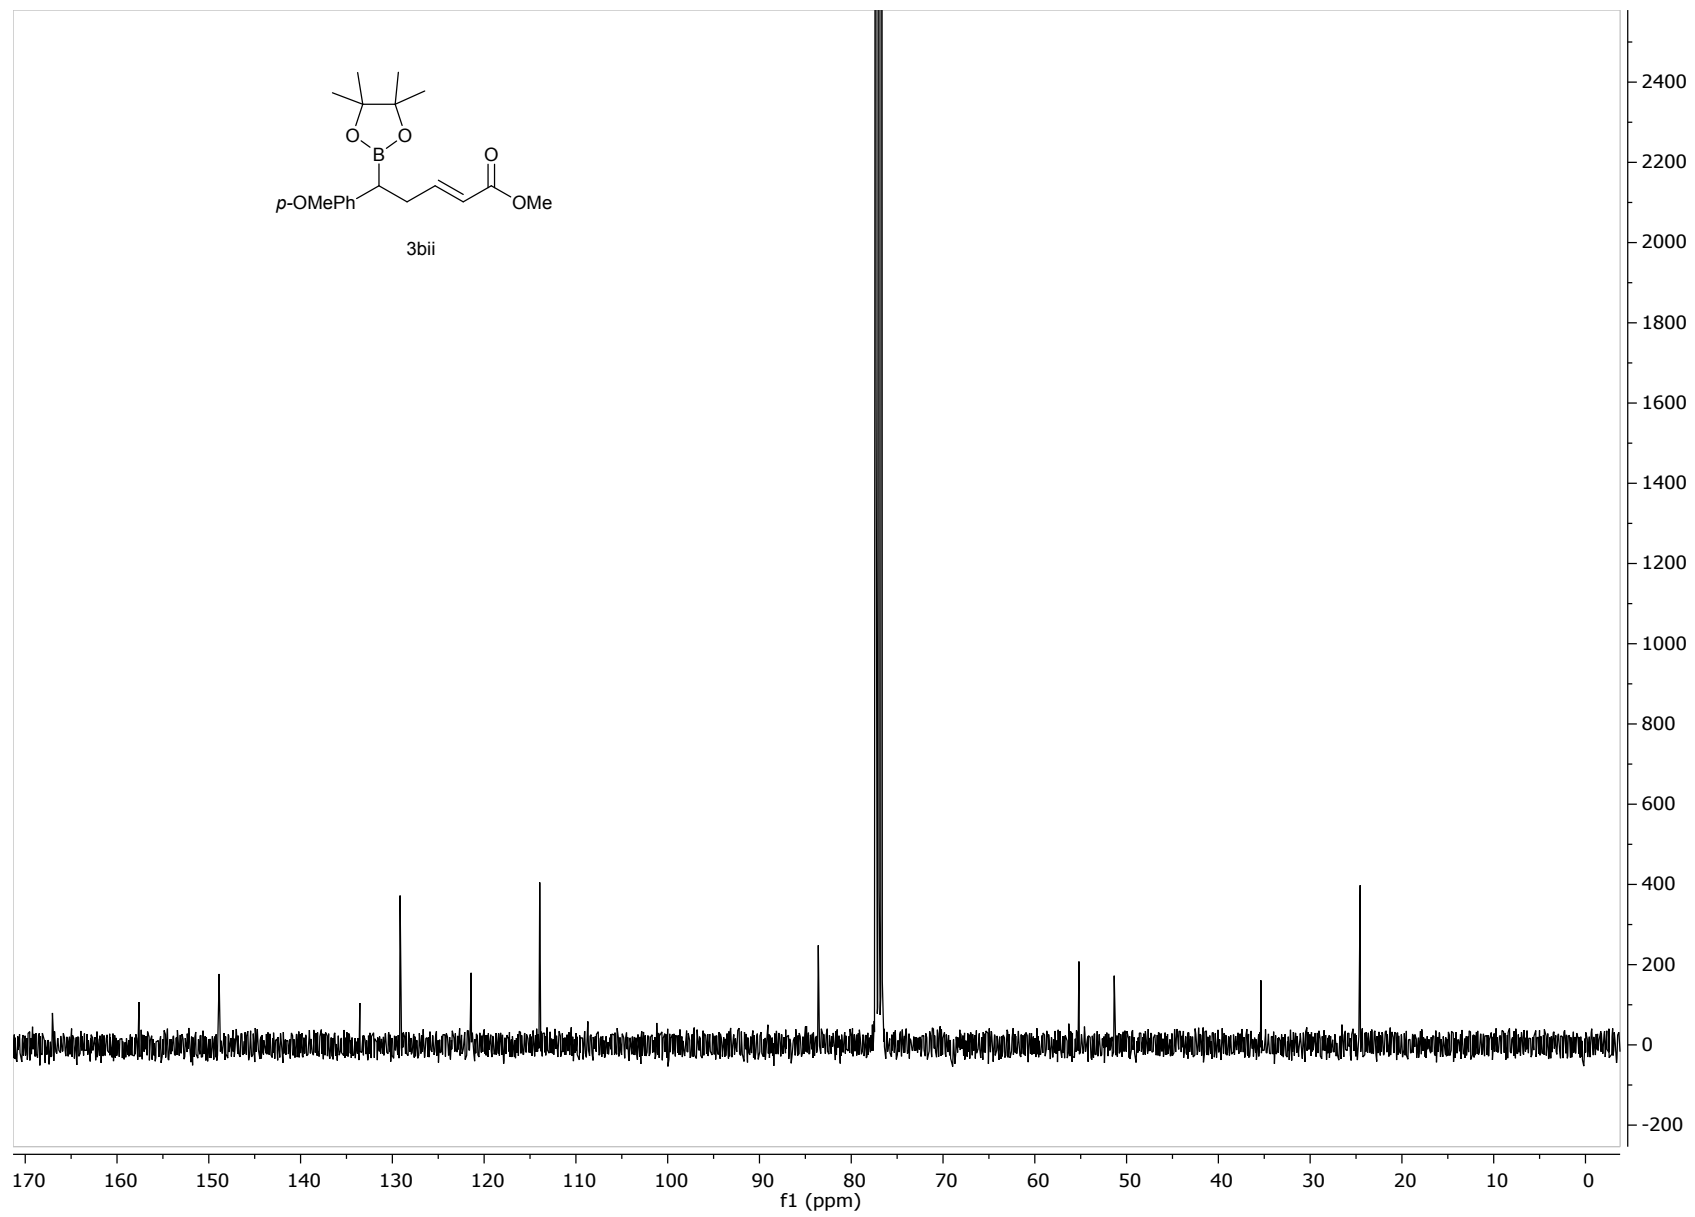



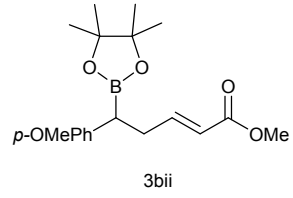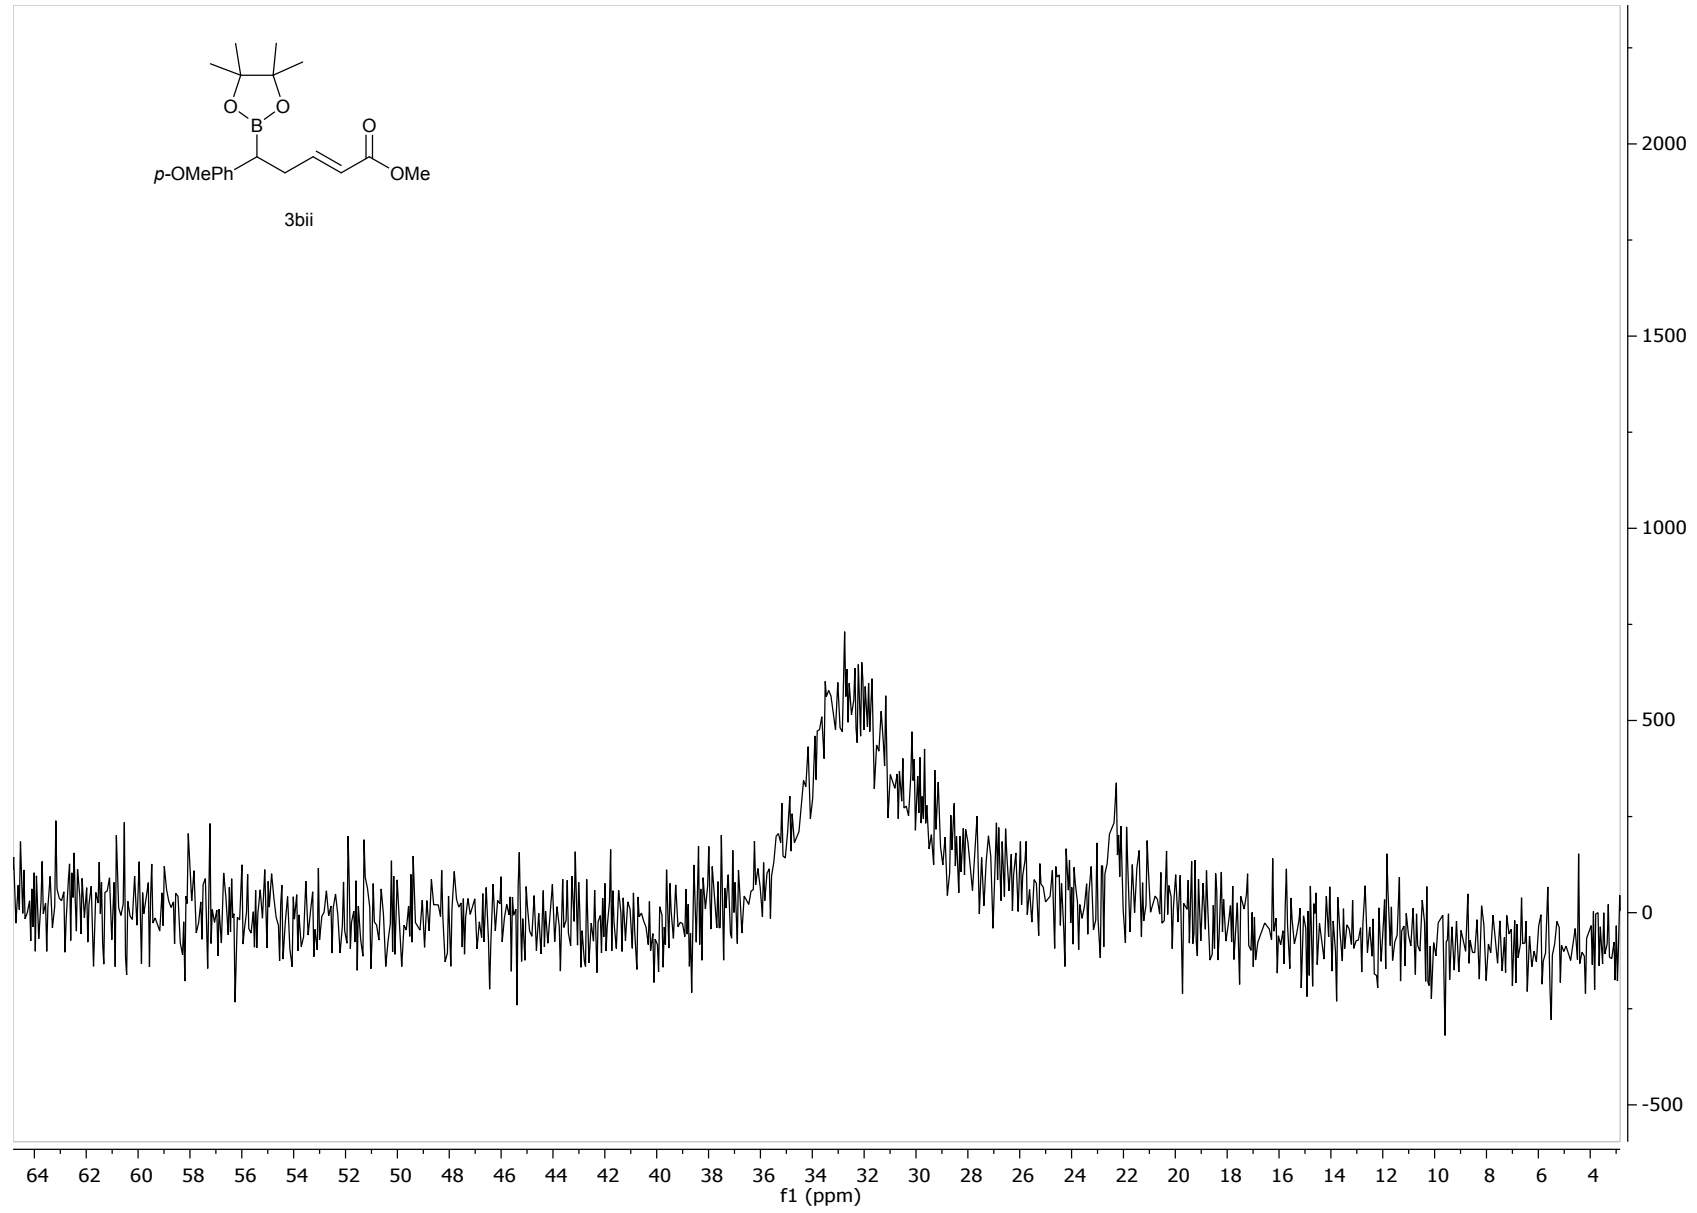

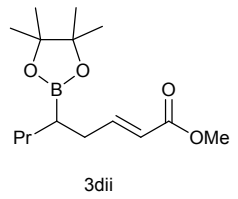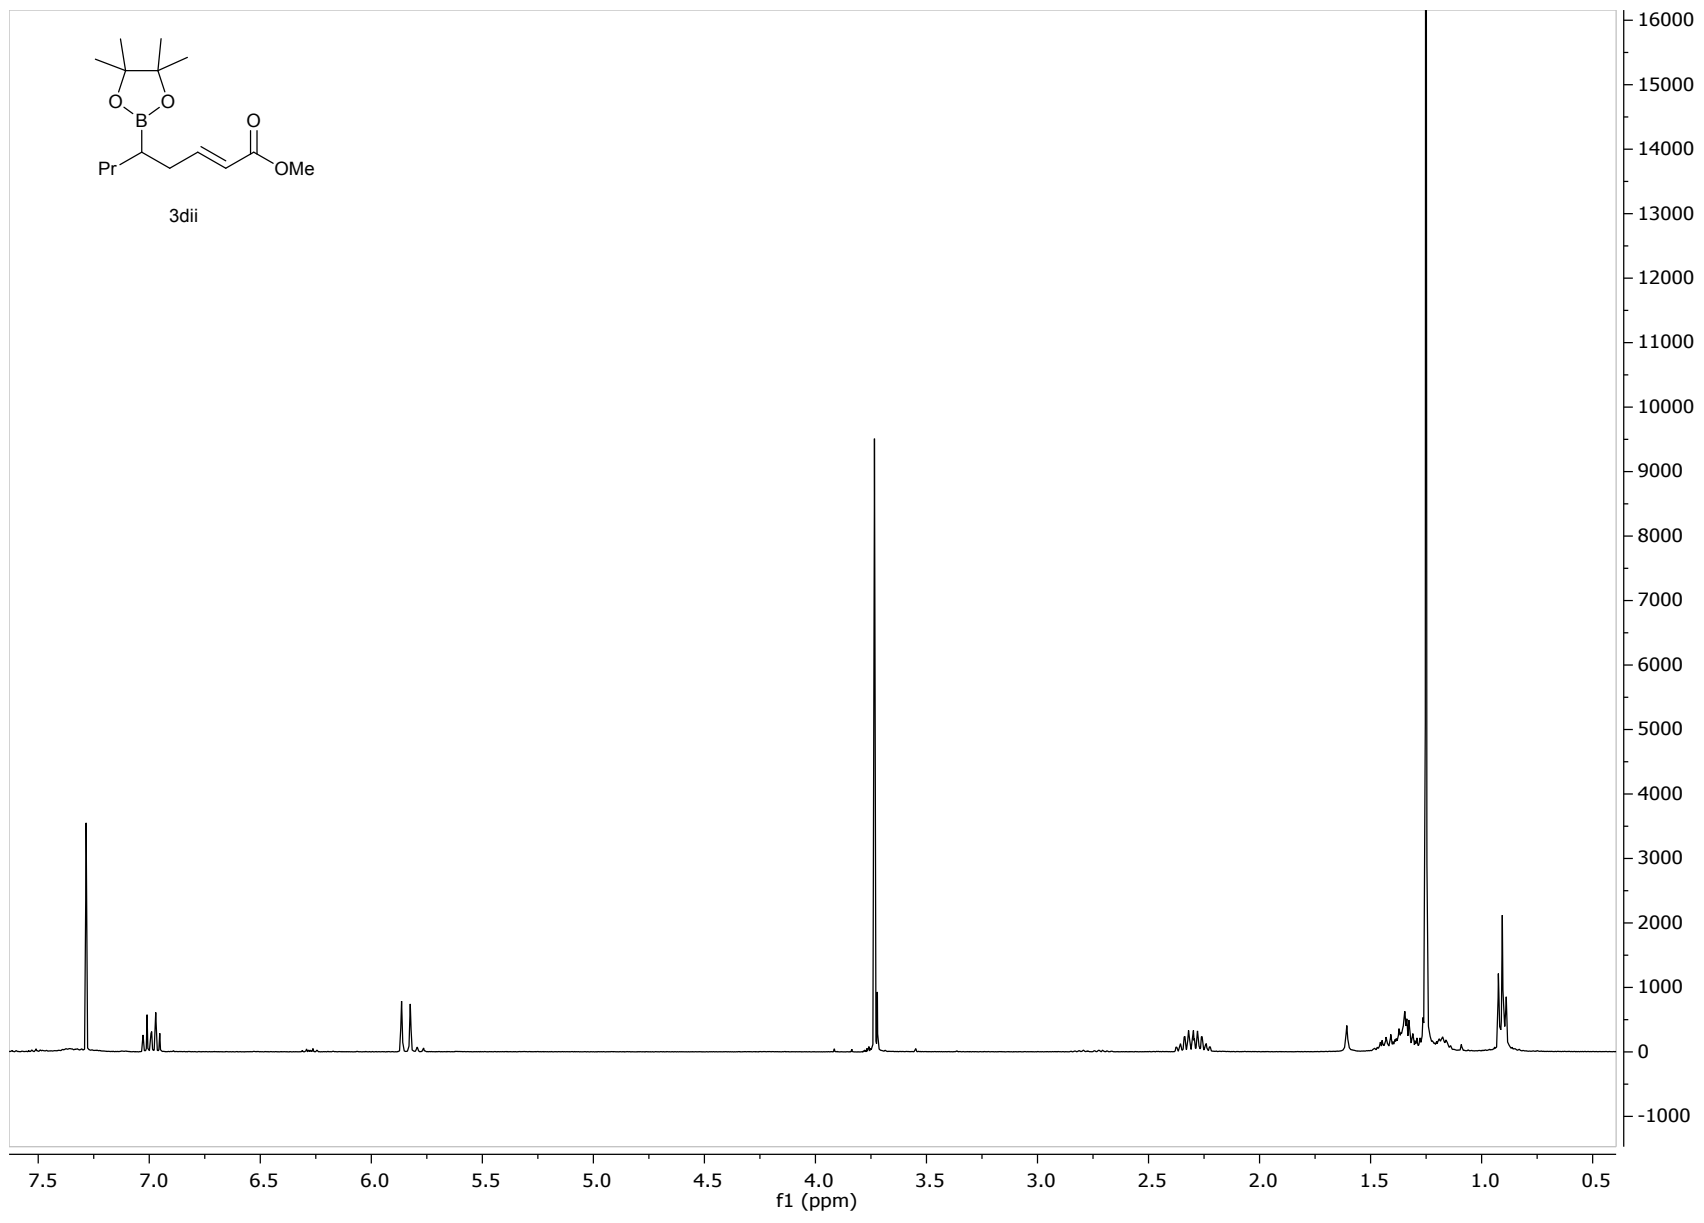

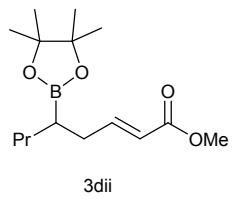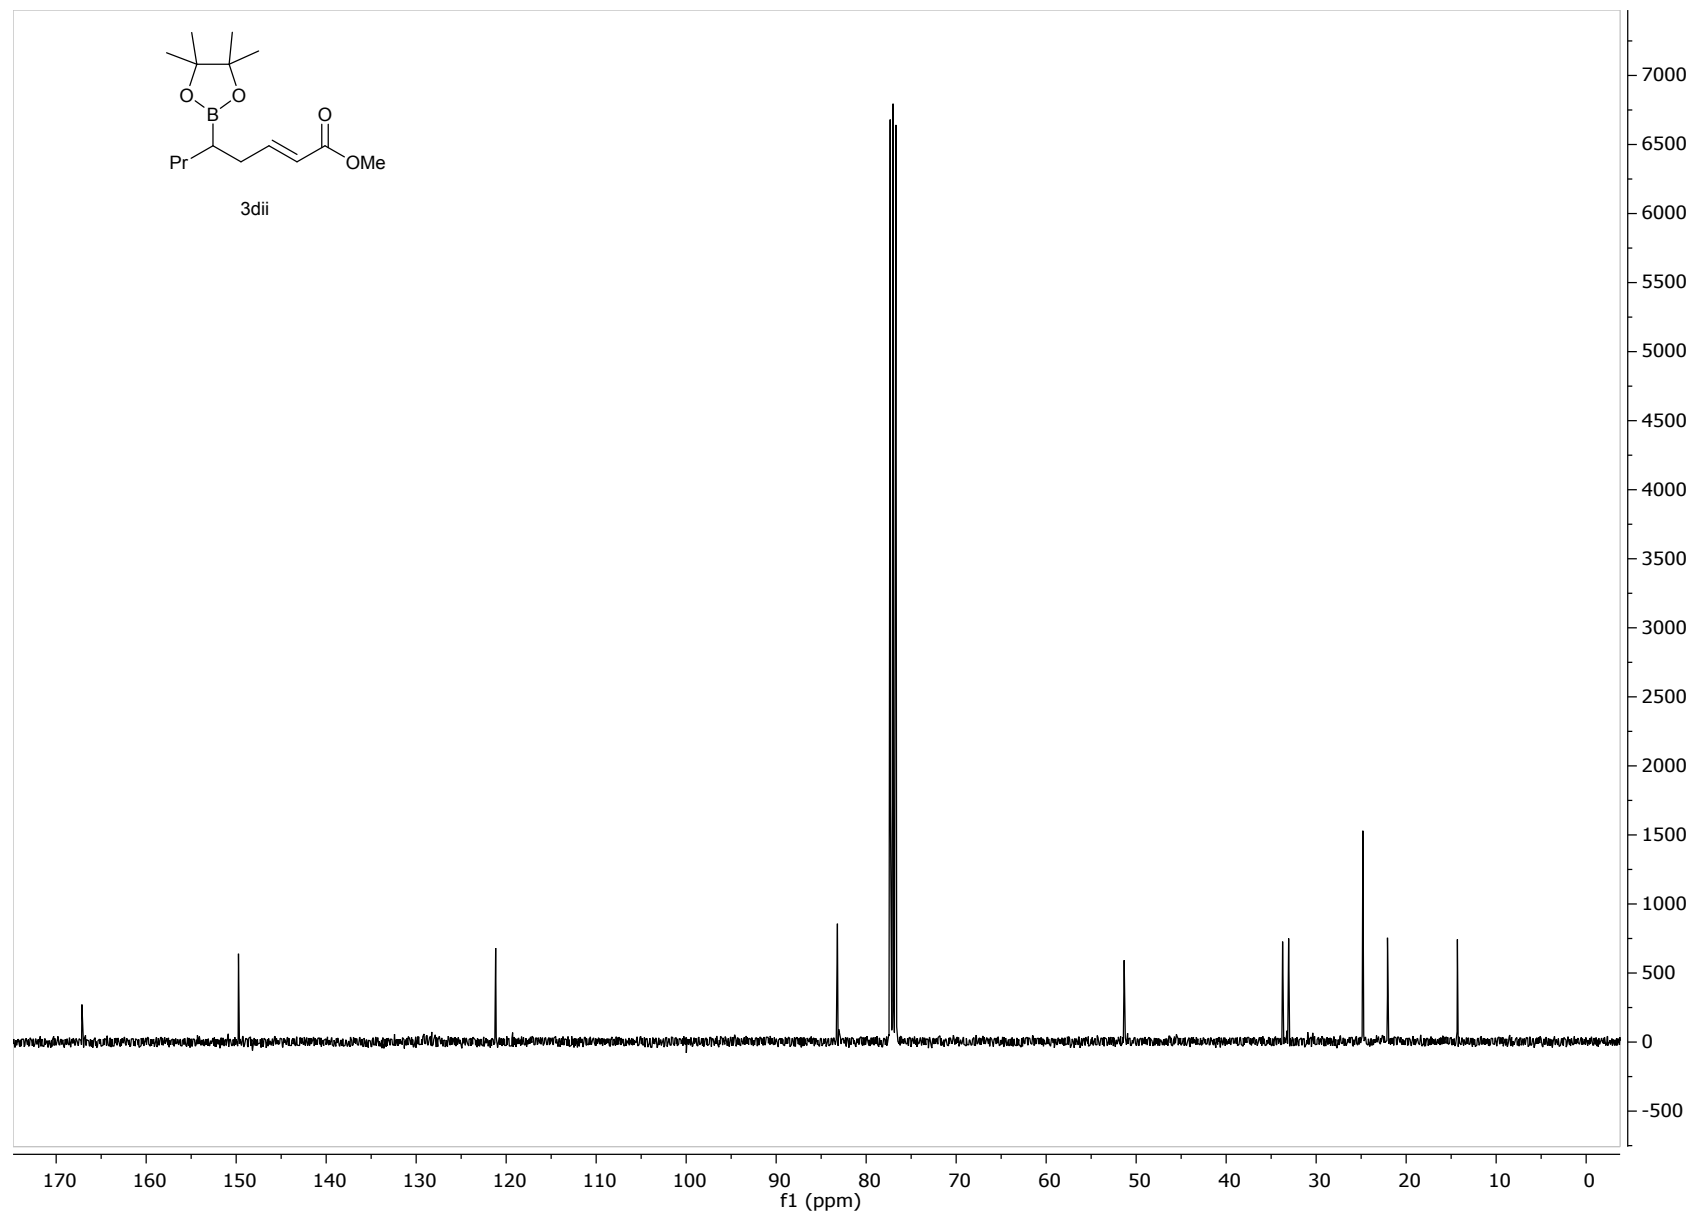

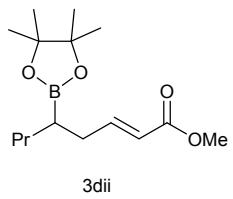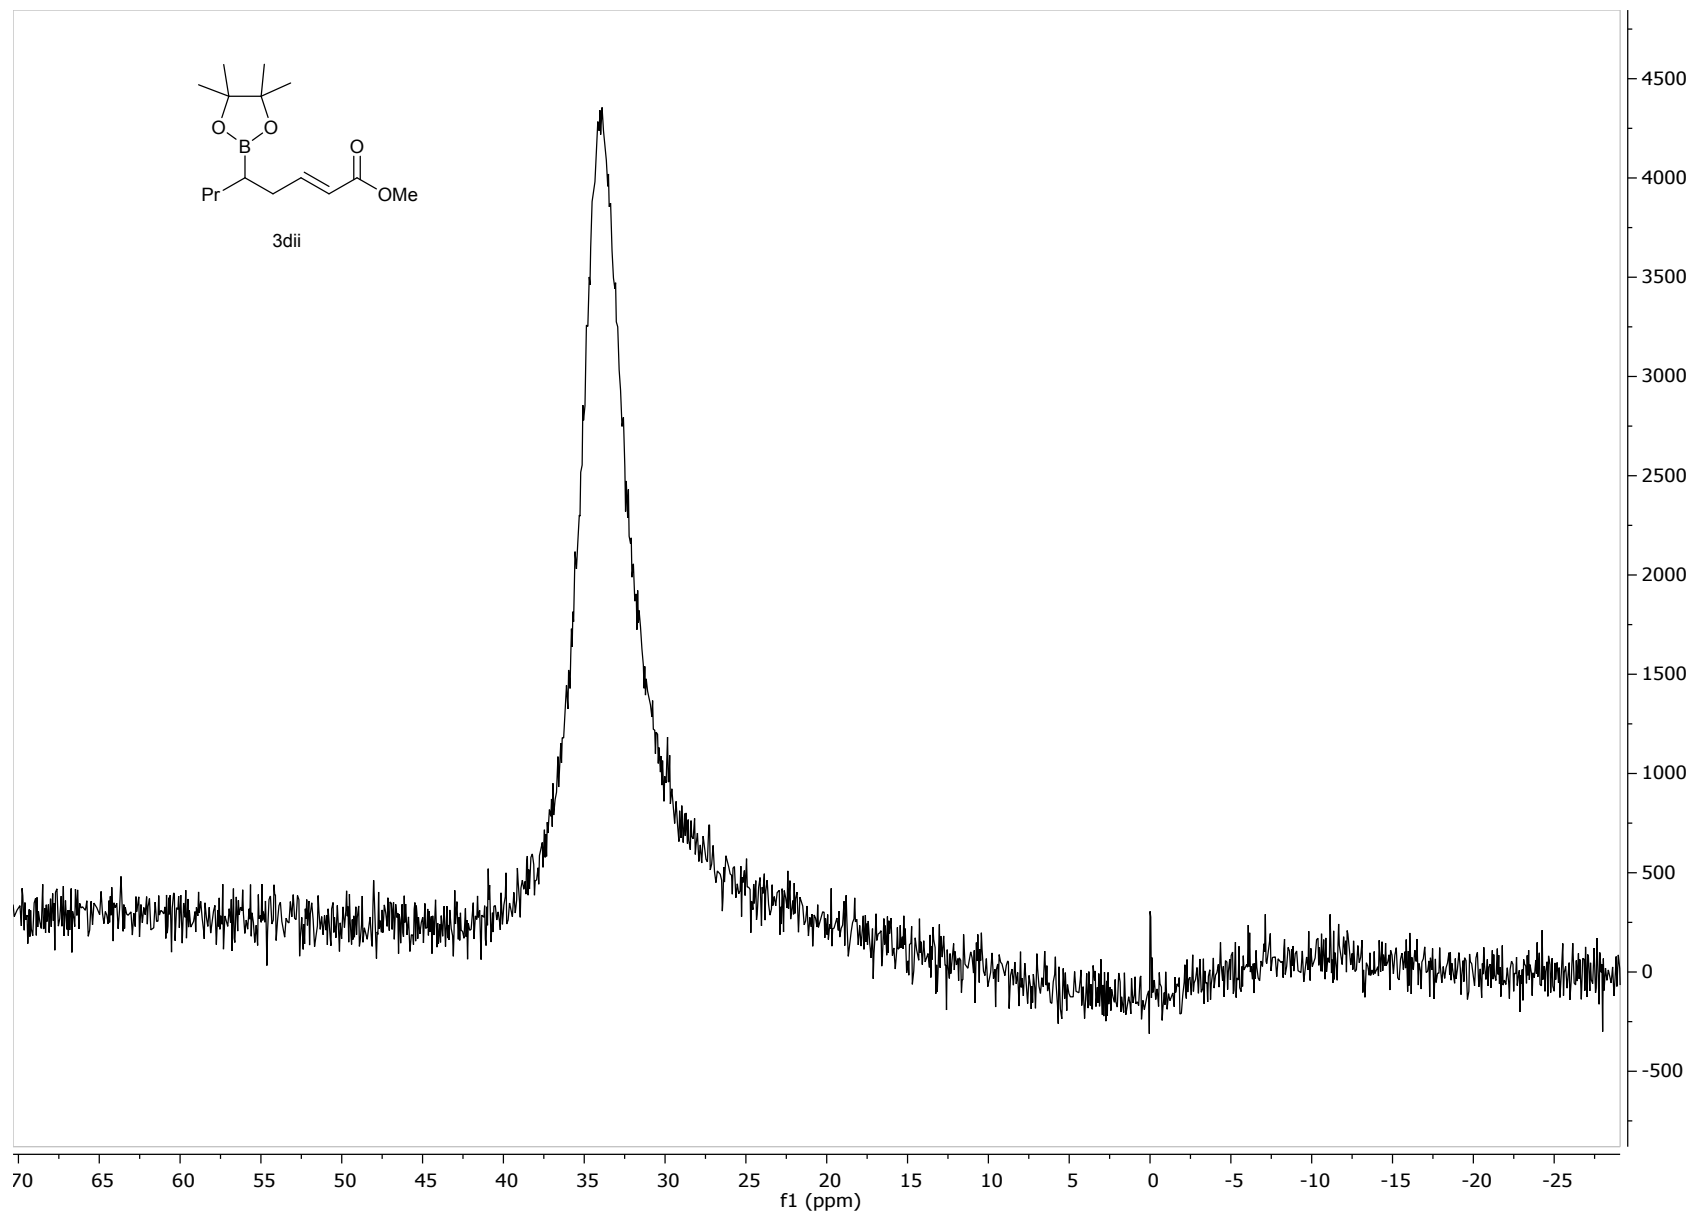

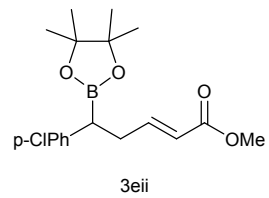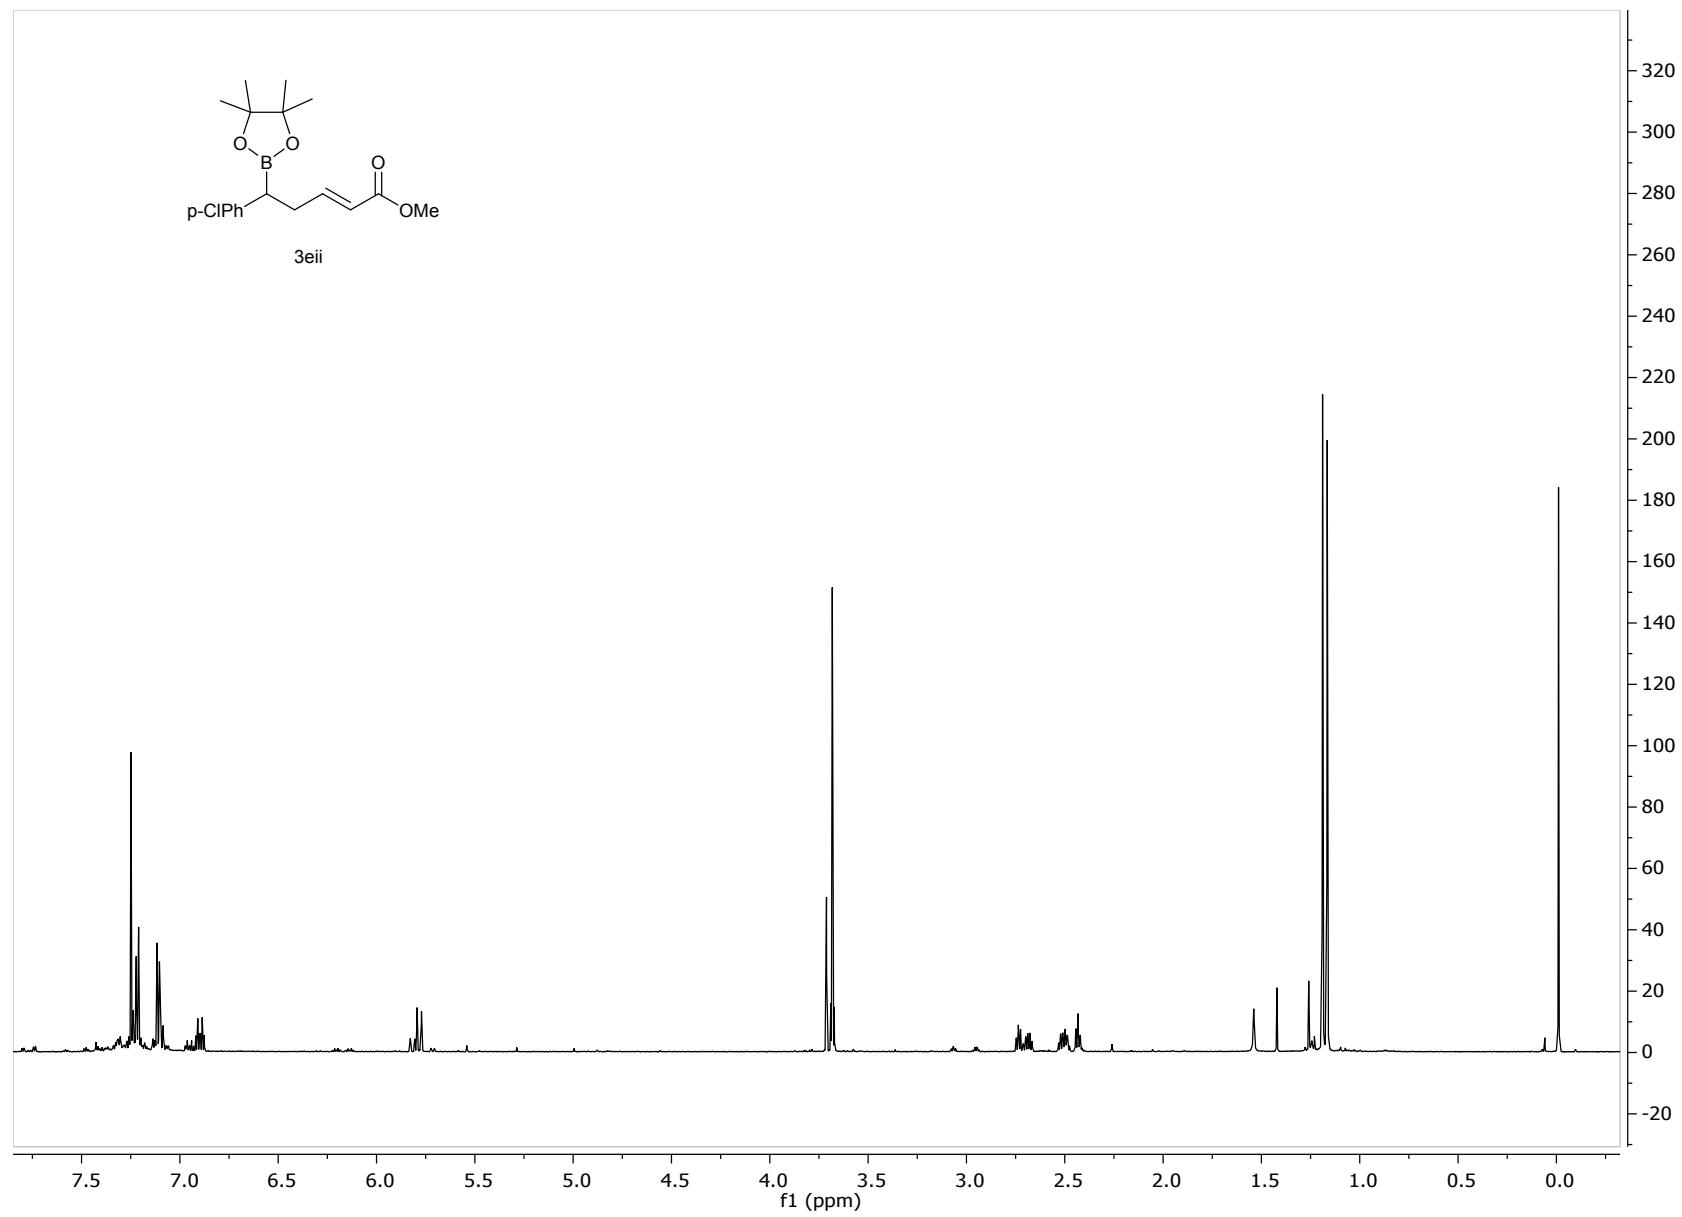

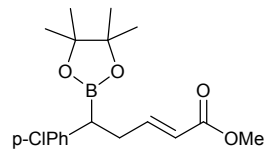

3eii

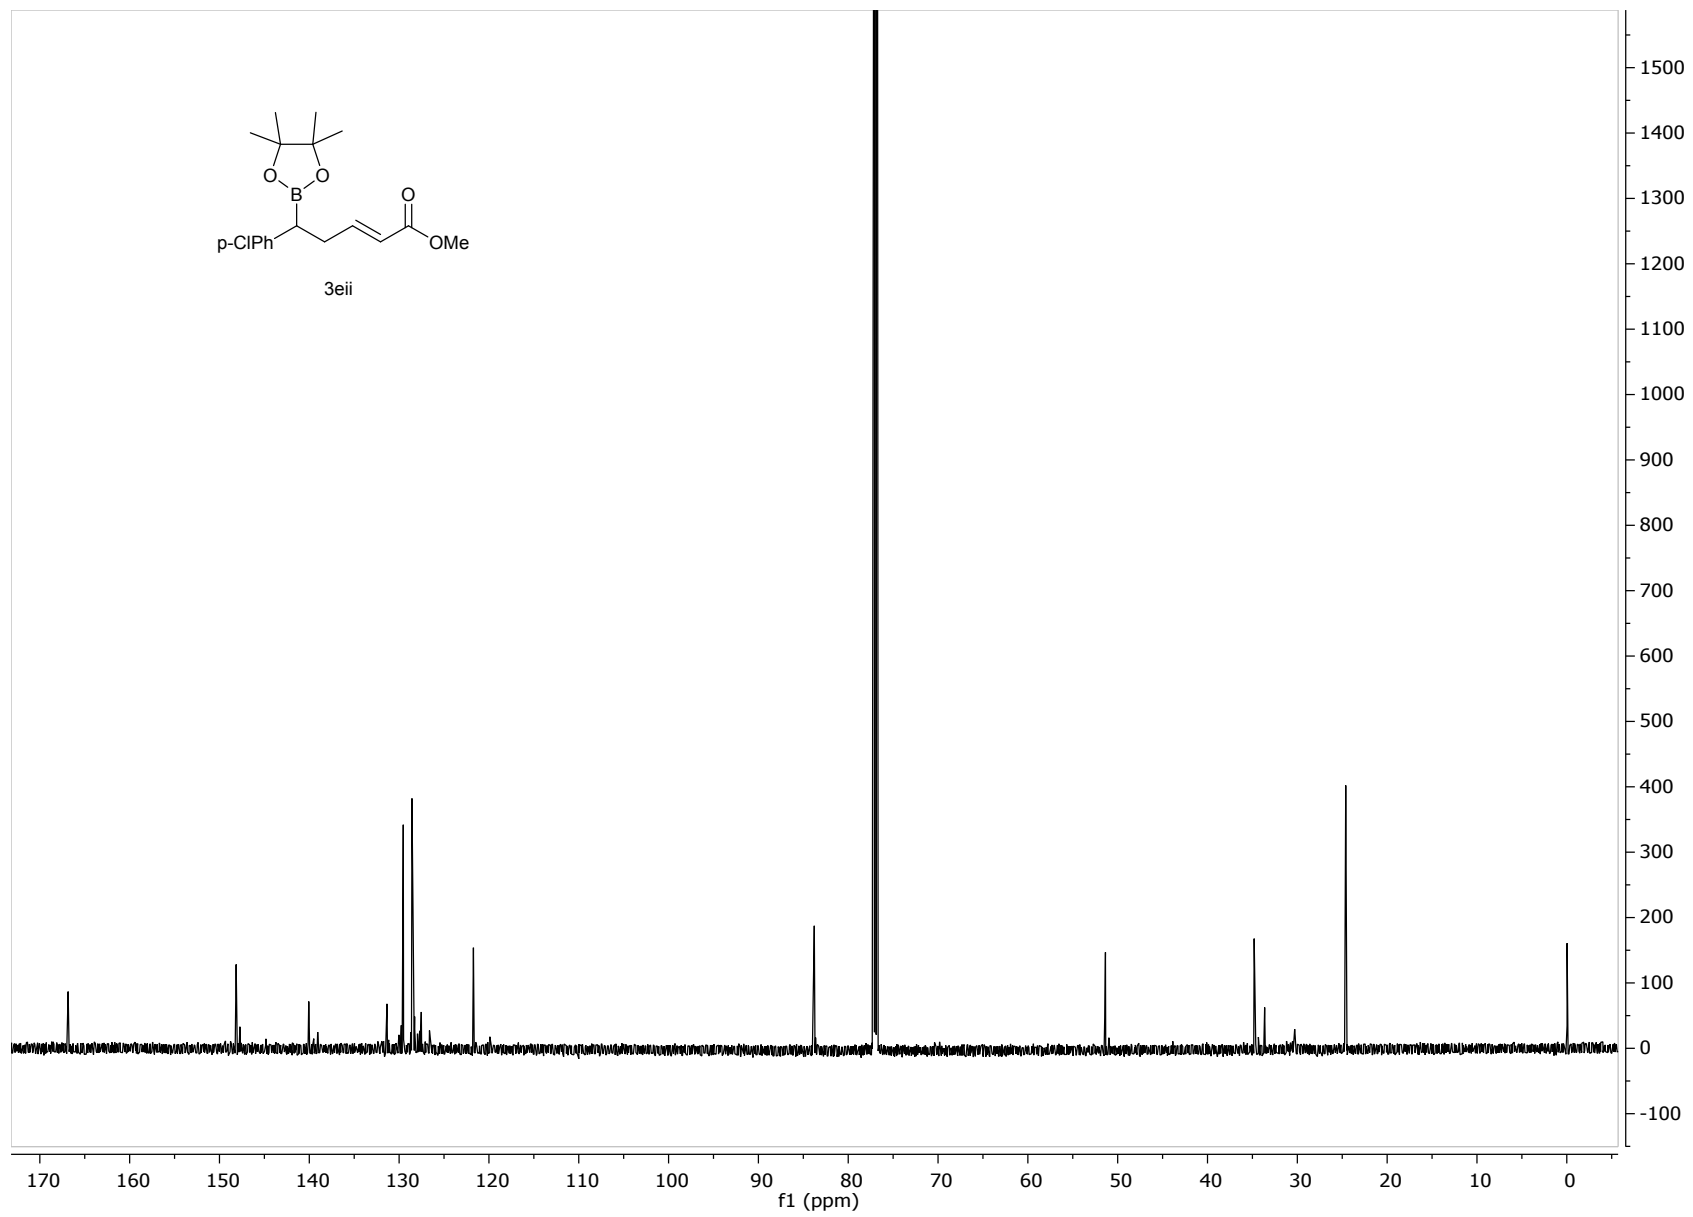

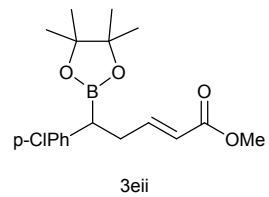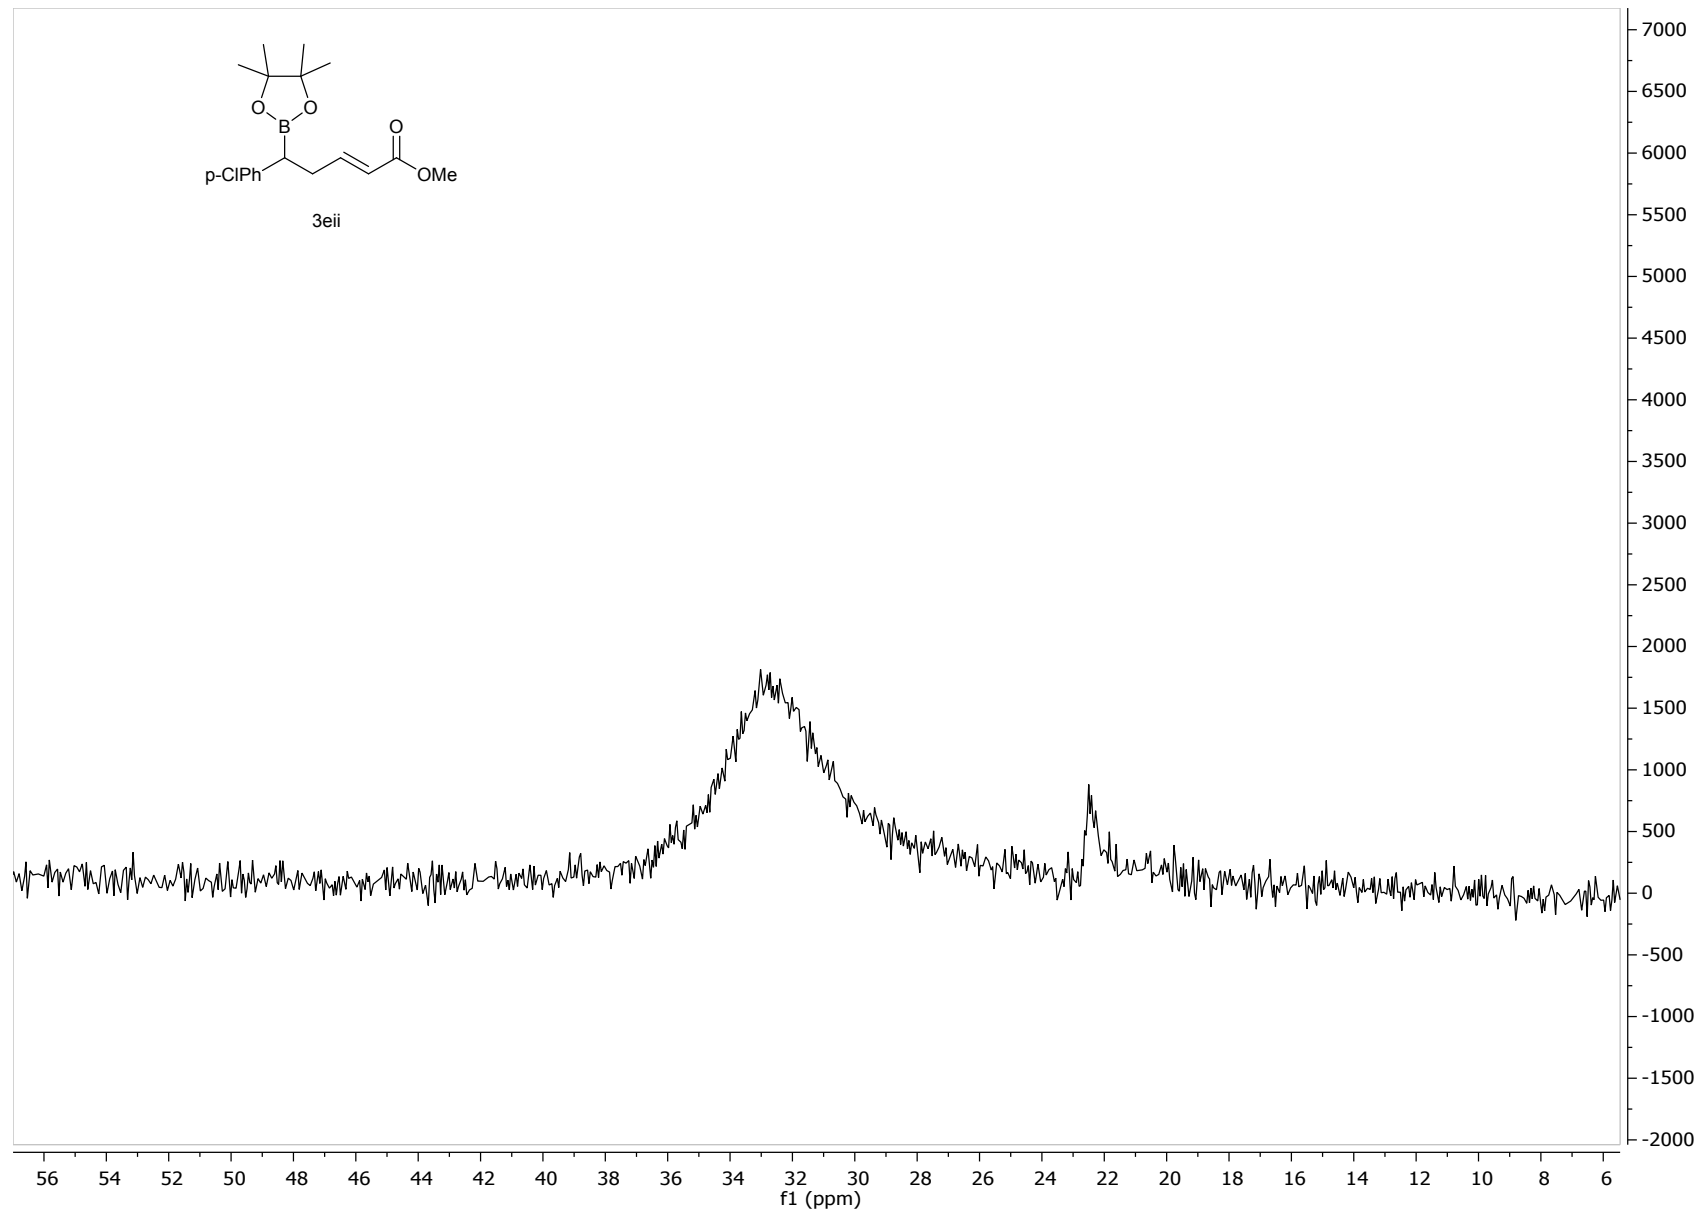

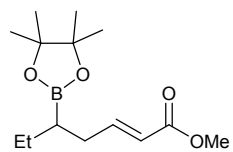

3fi

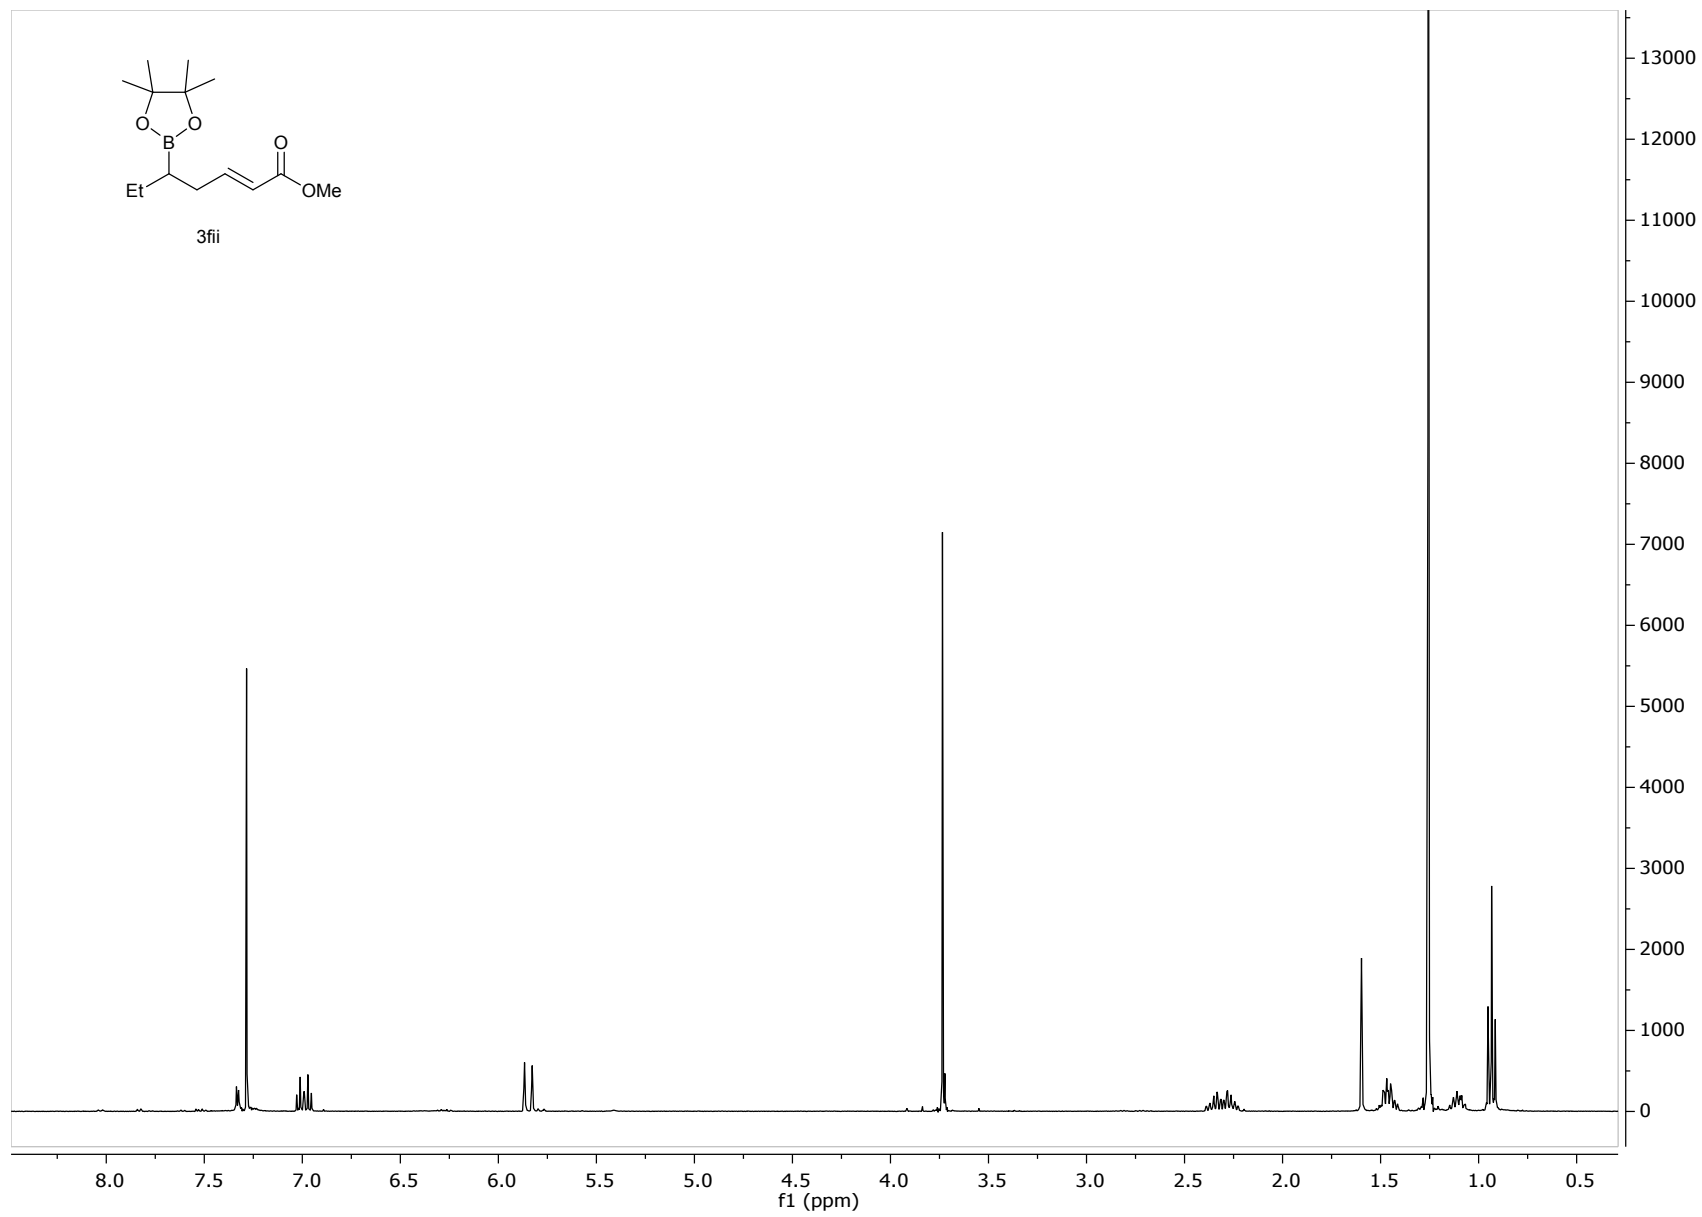



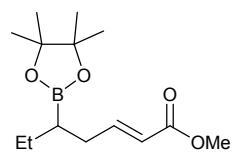

3fii

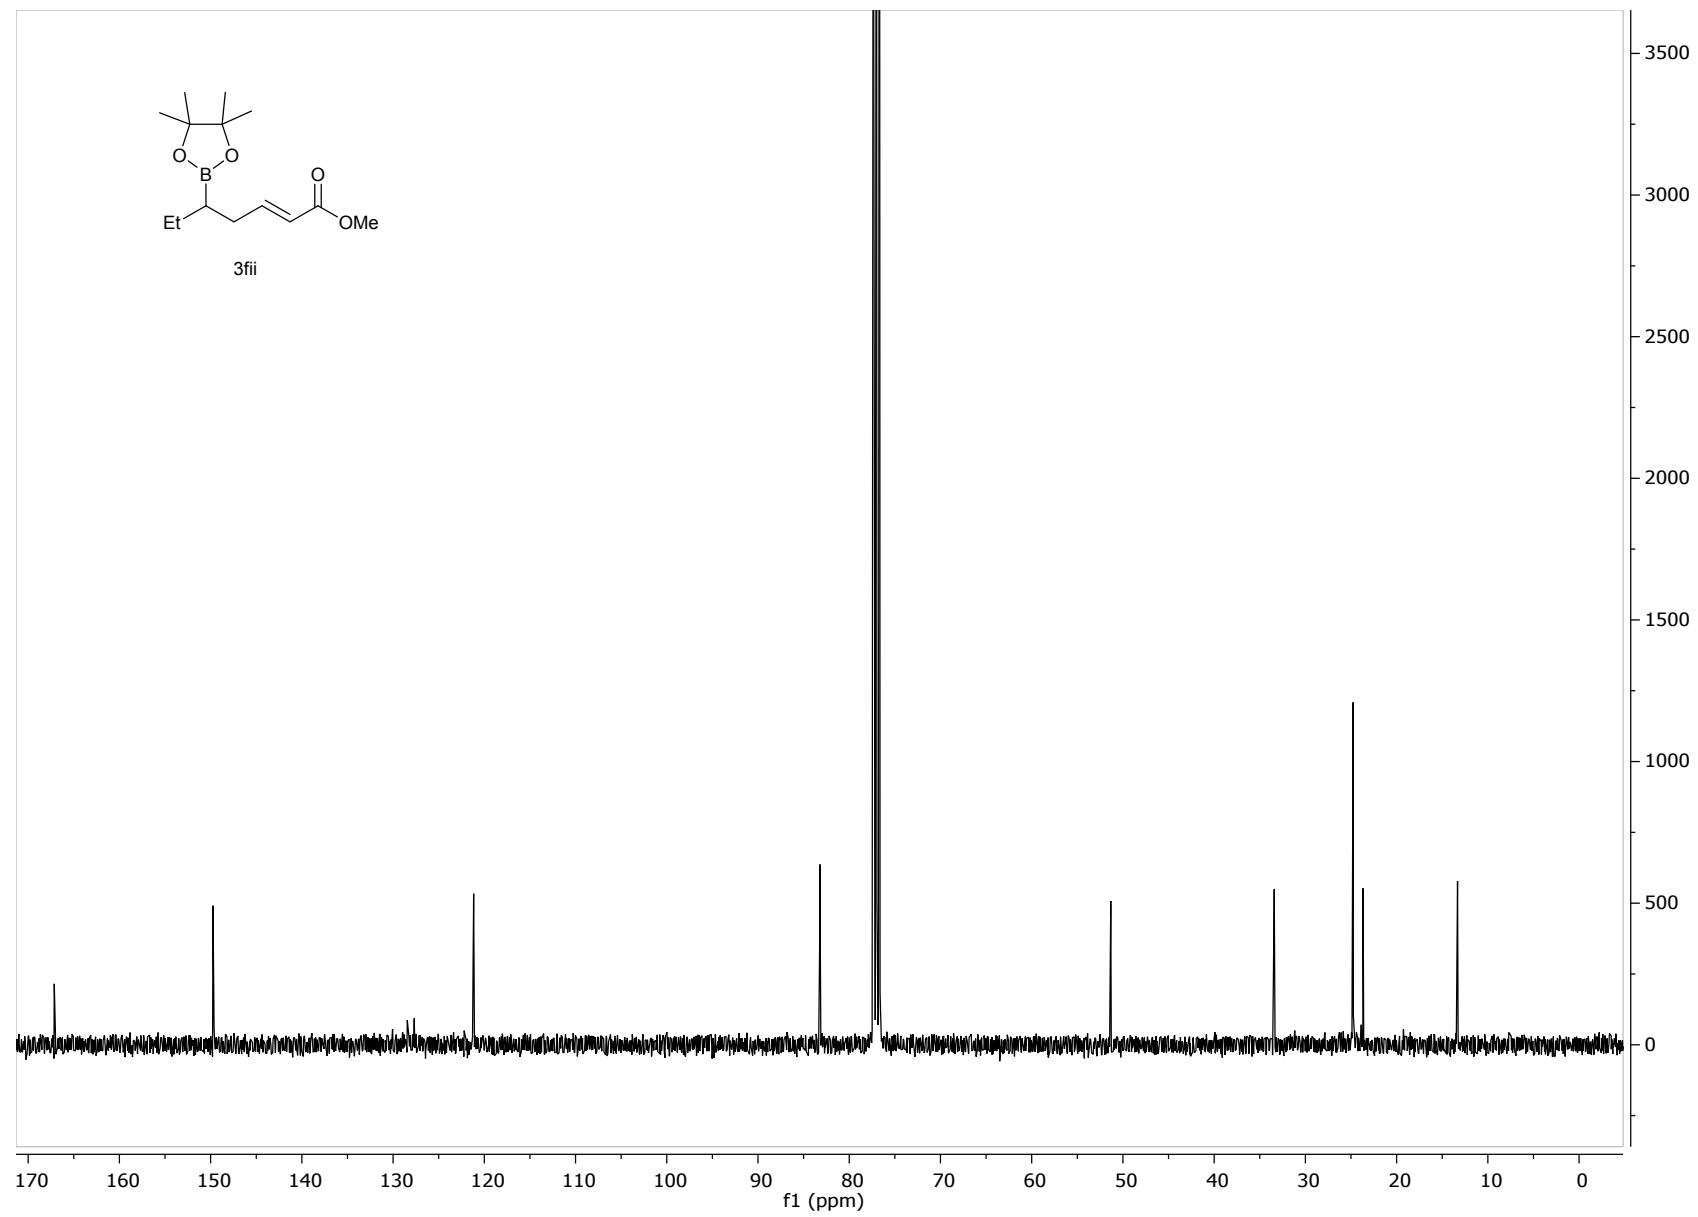

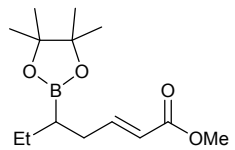

3fii

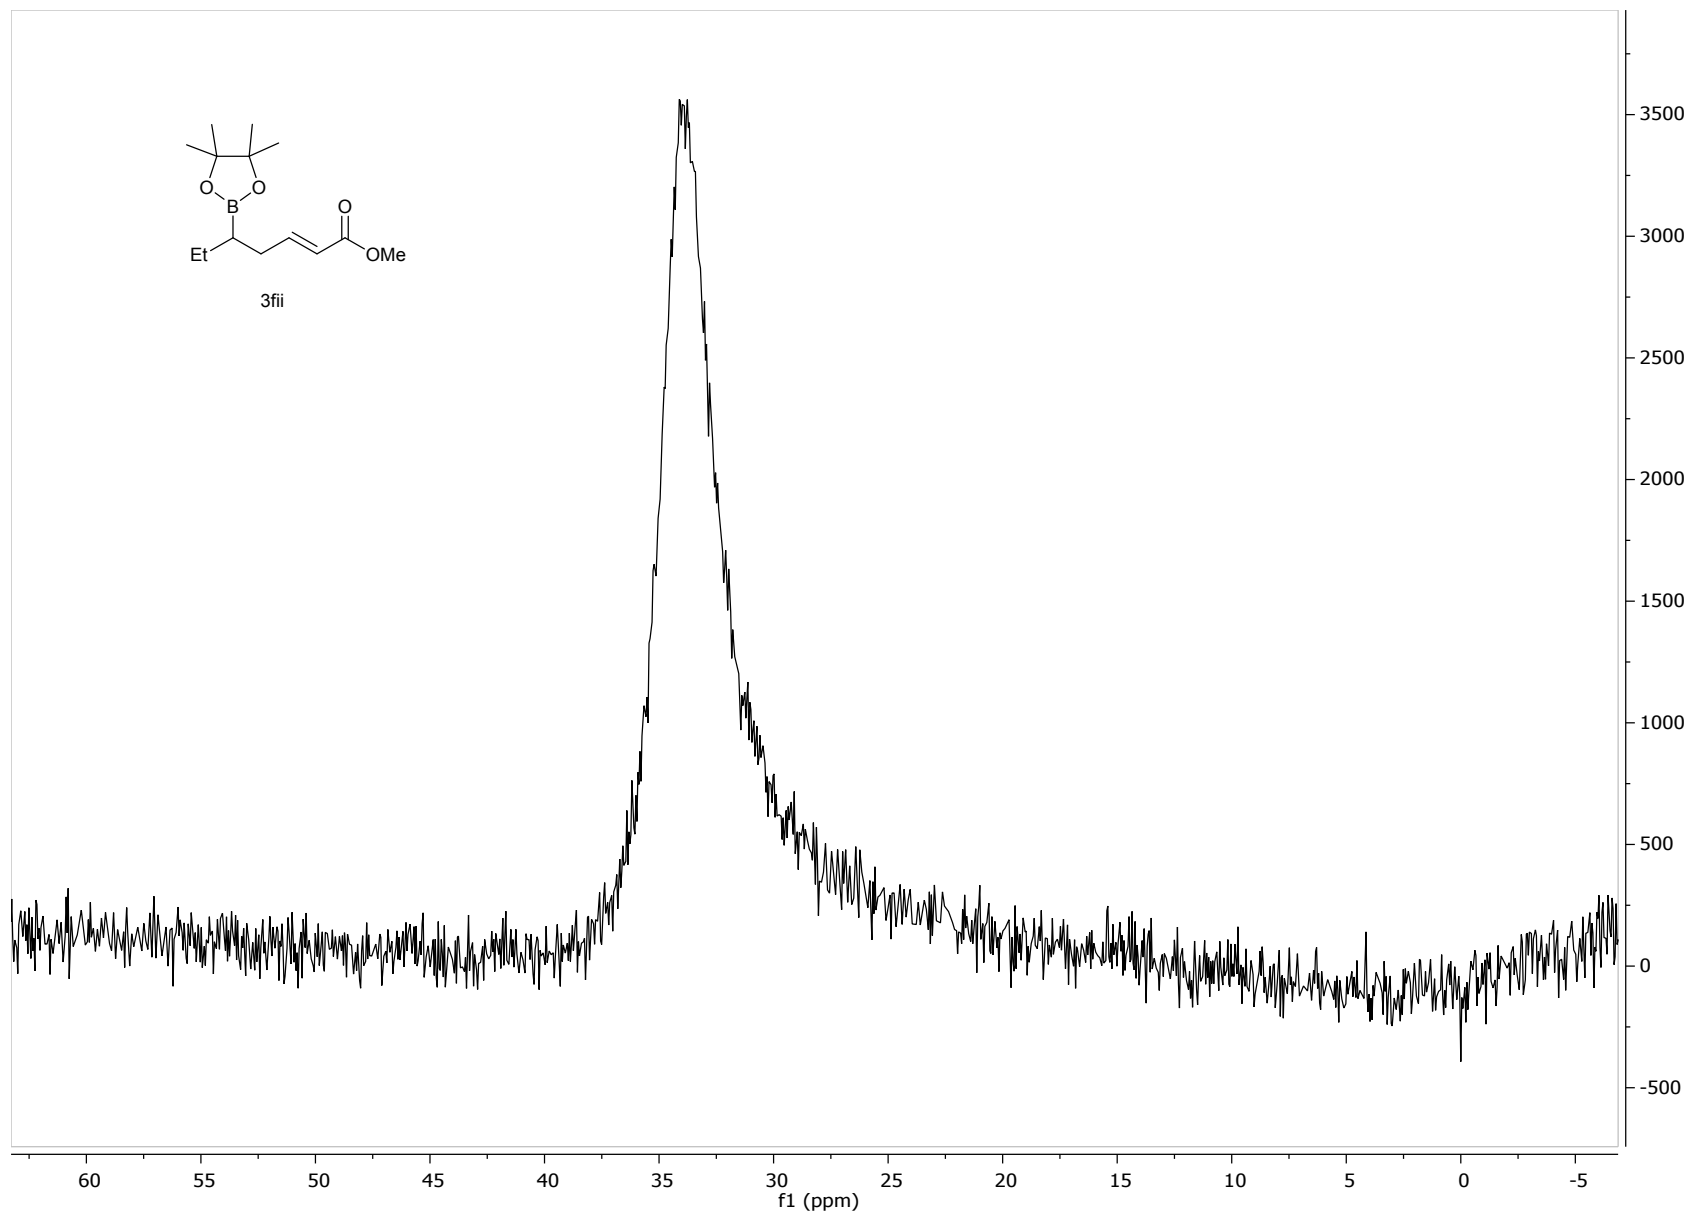

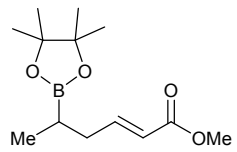

3gii

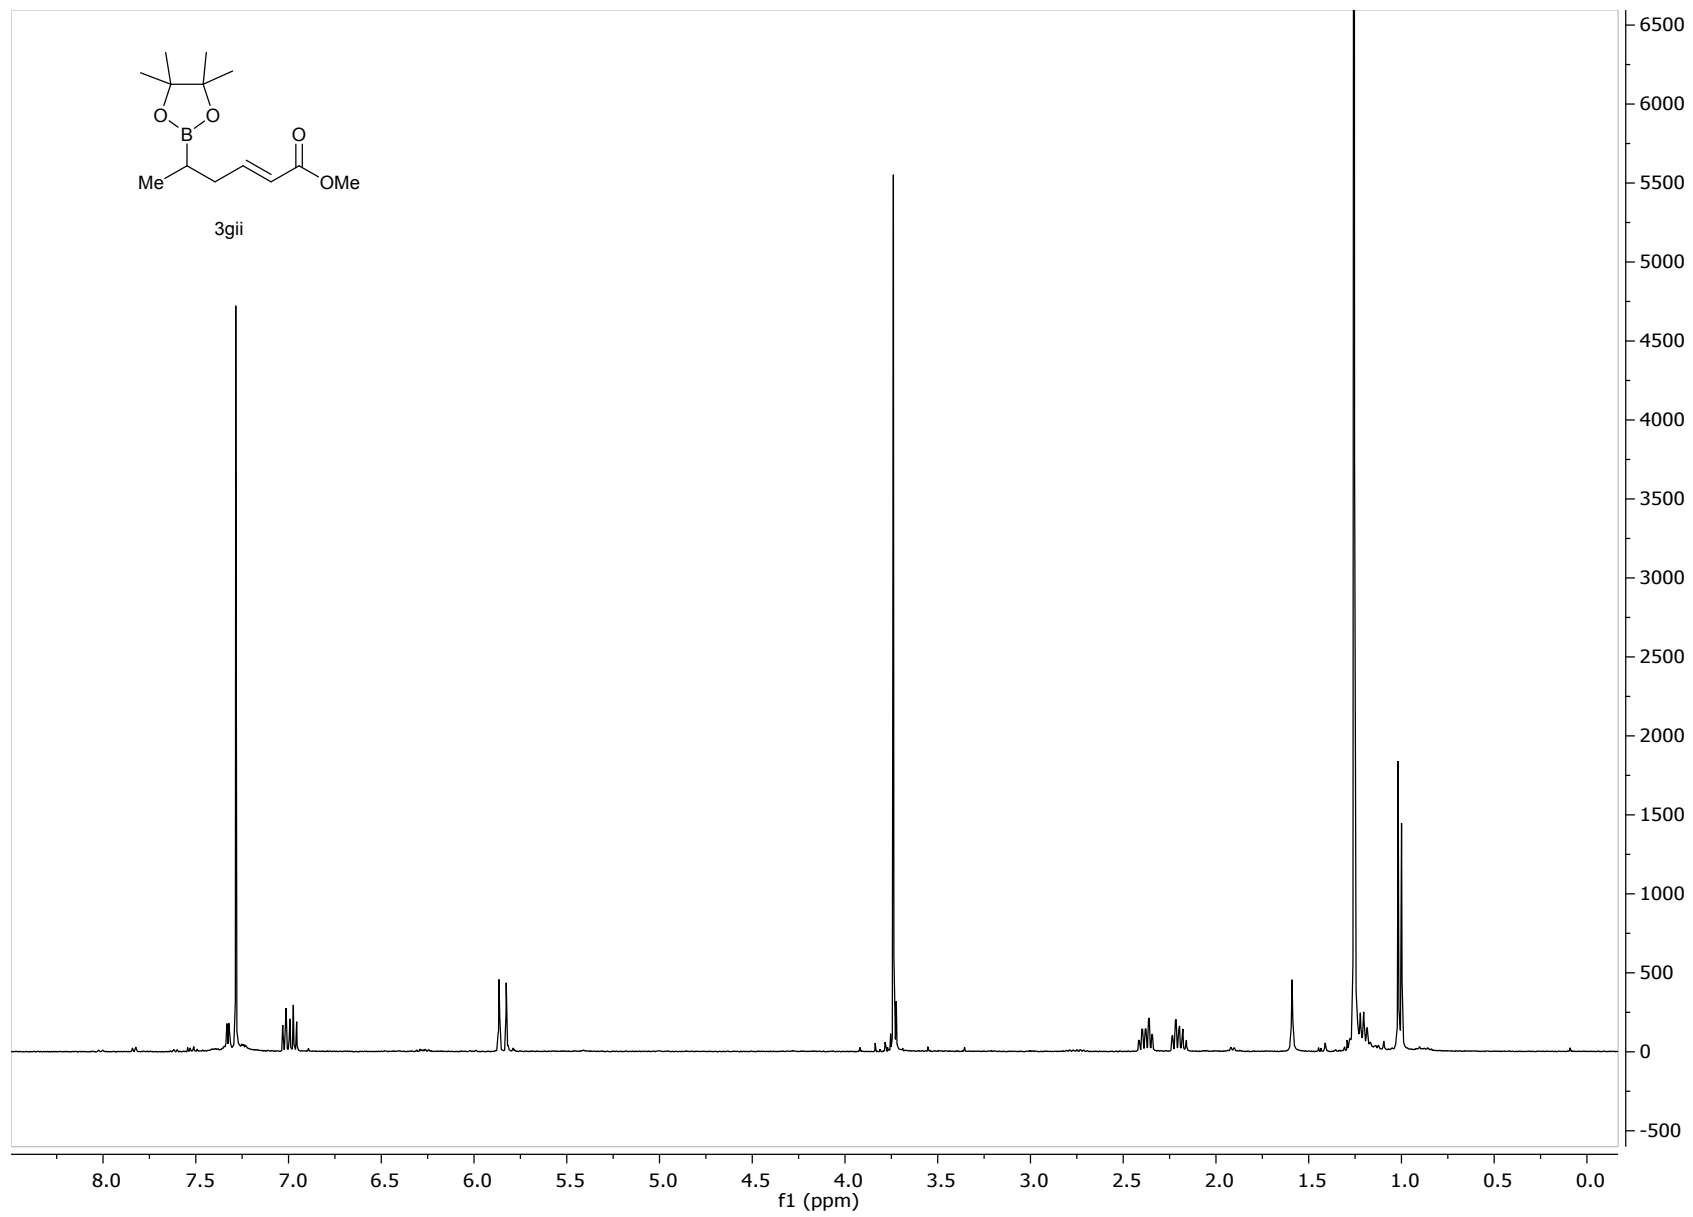

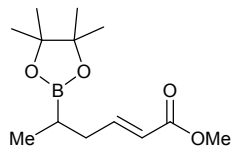

3gii

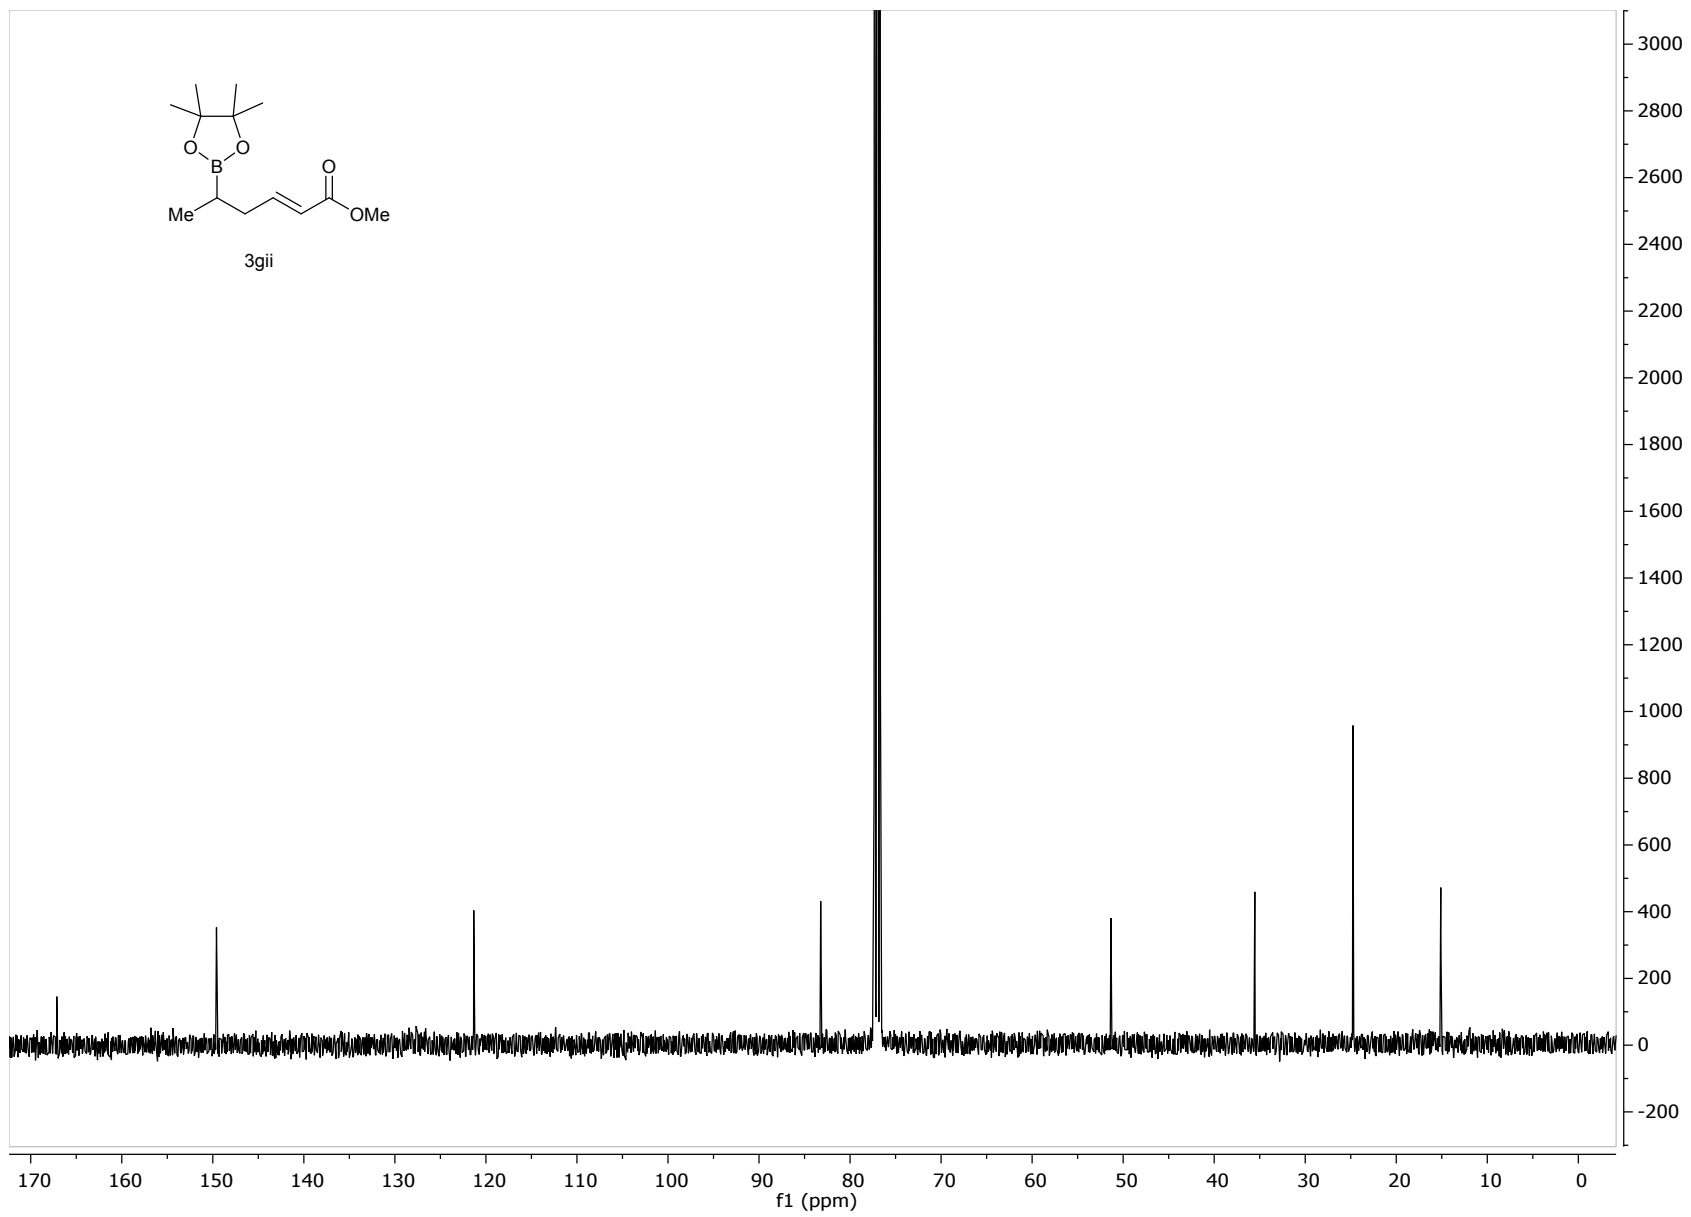

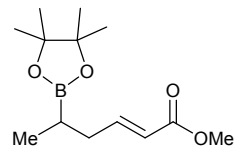

3gii

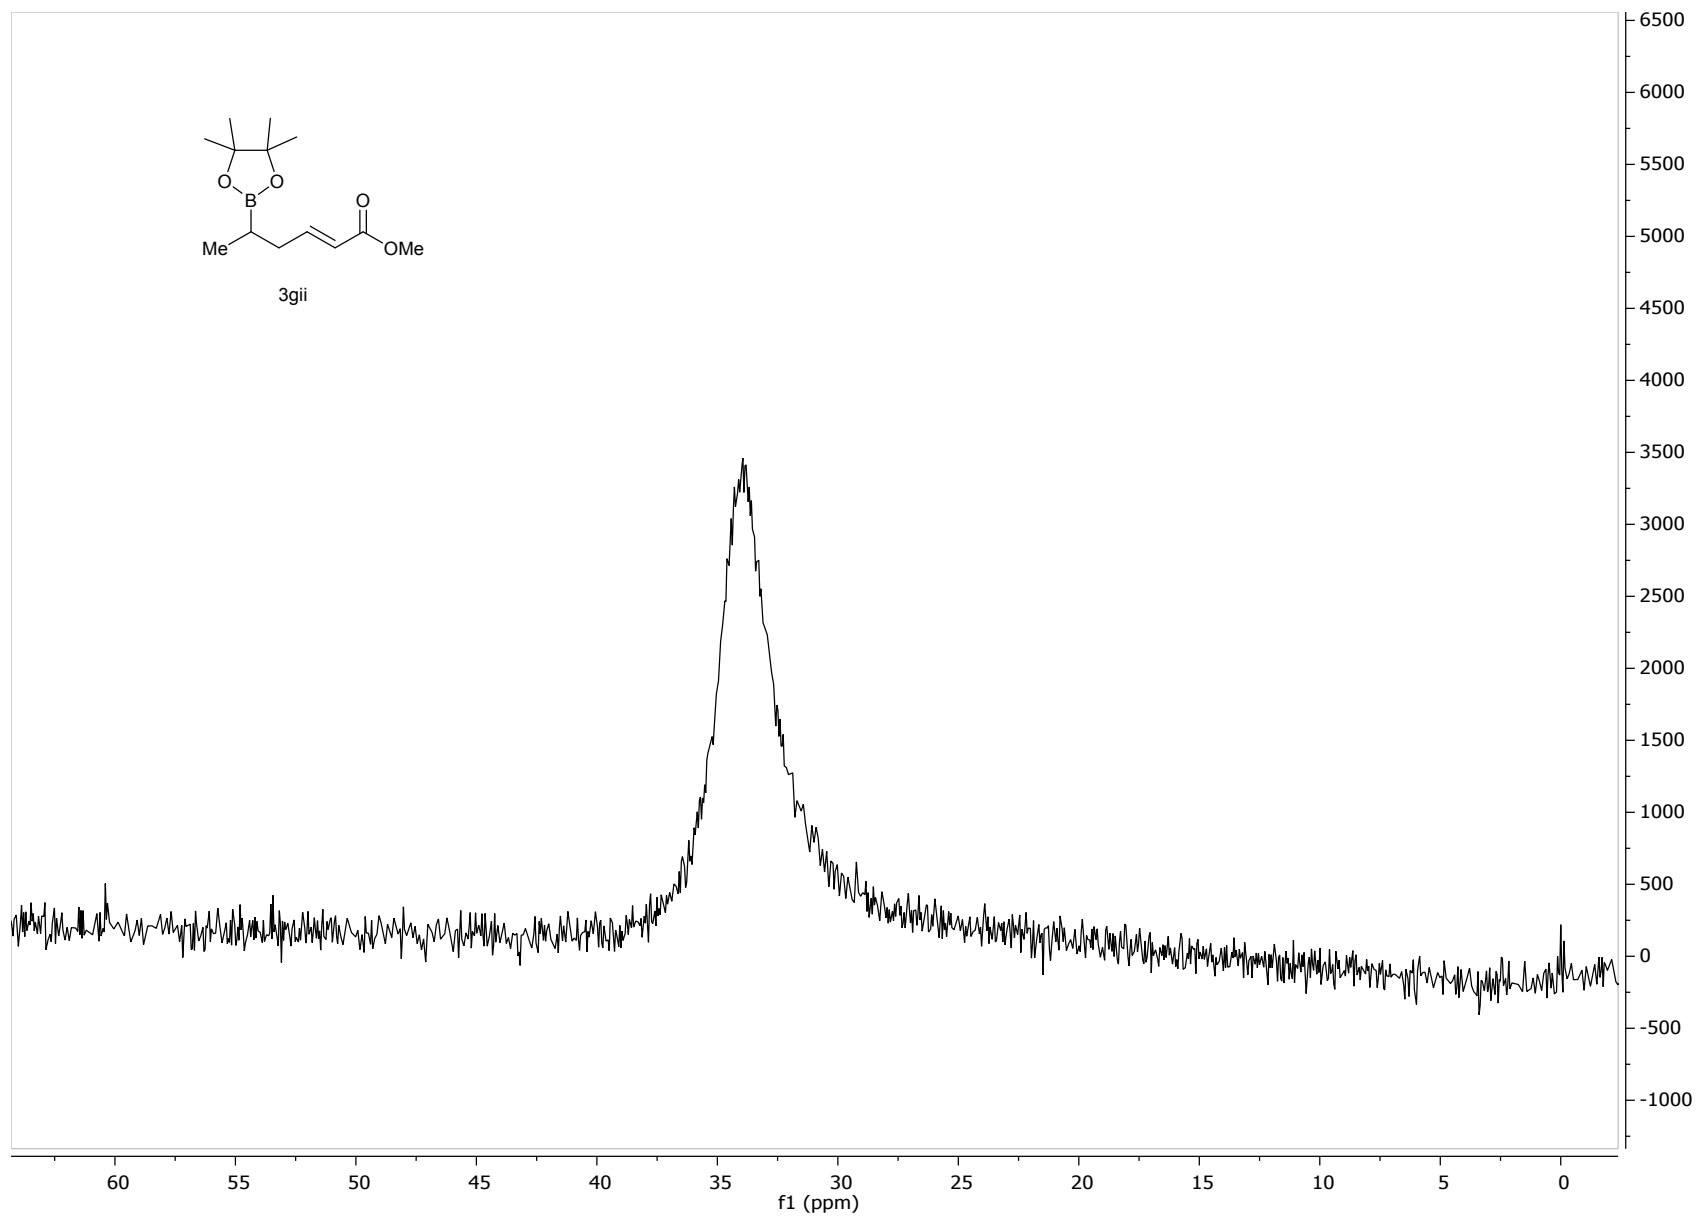

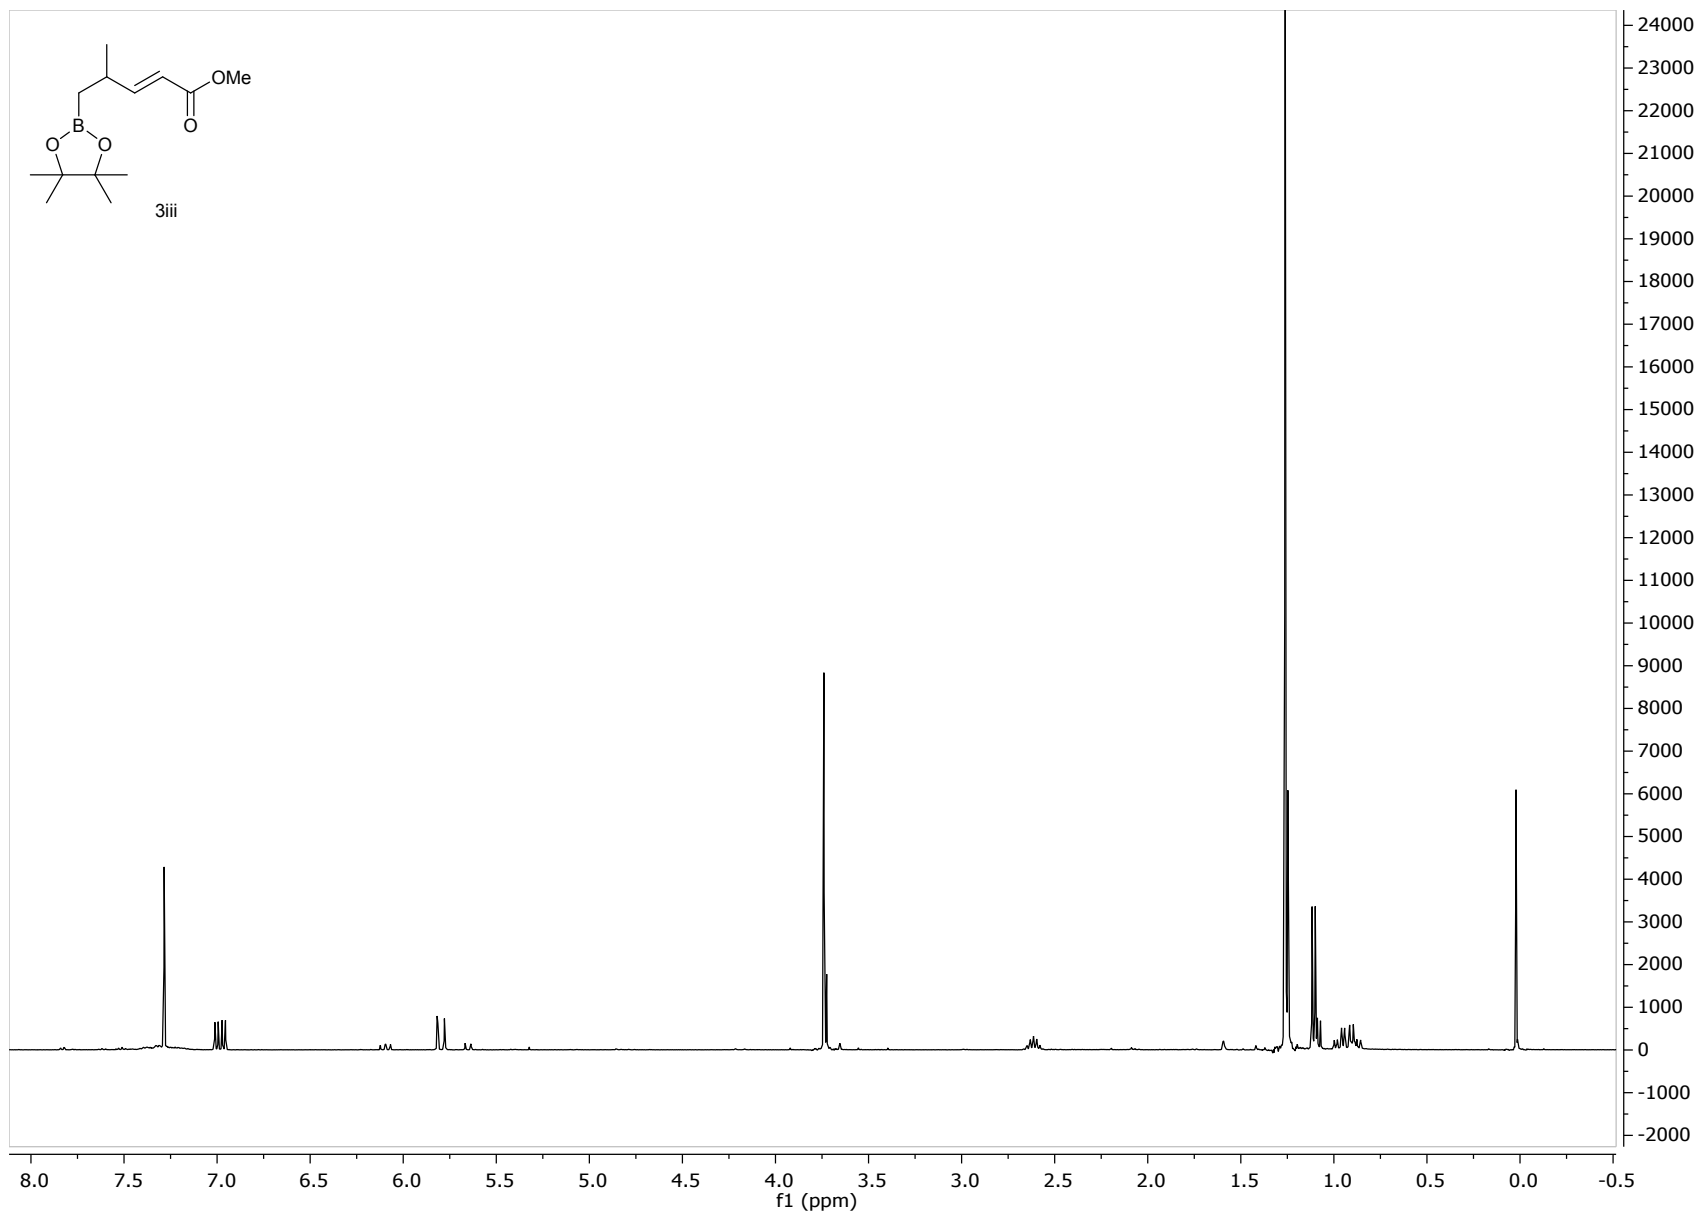

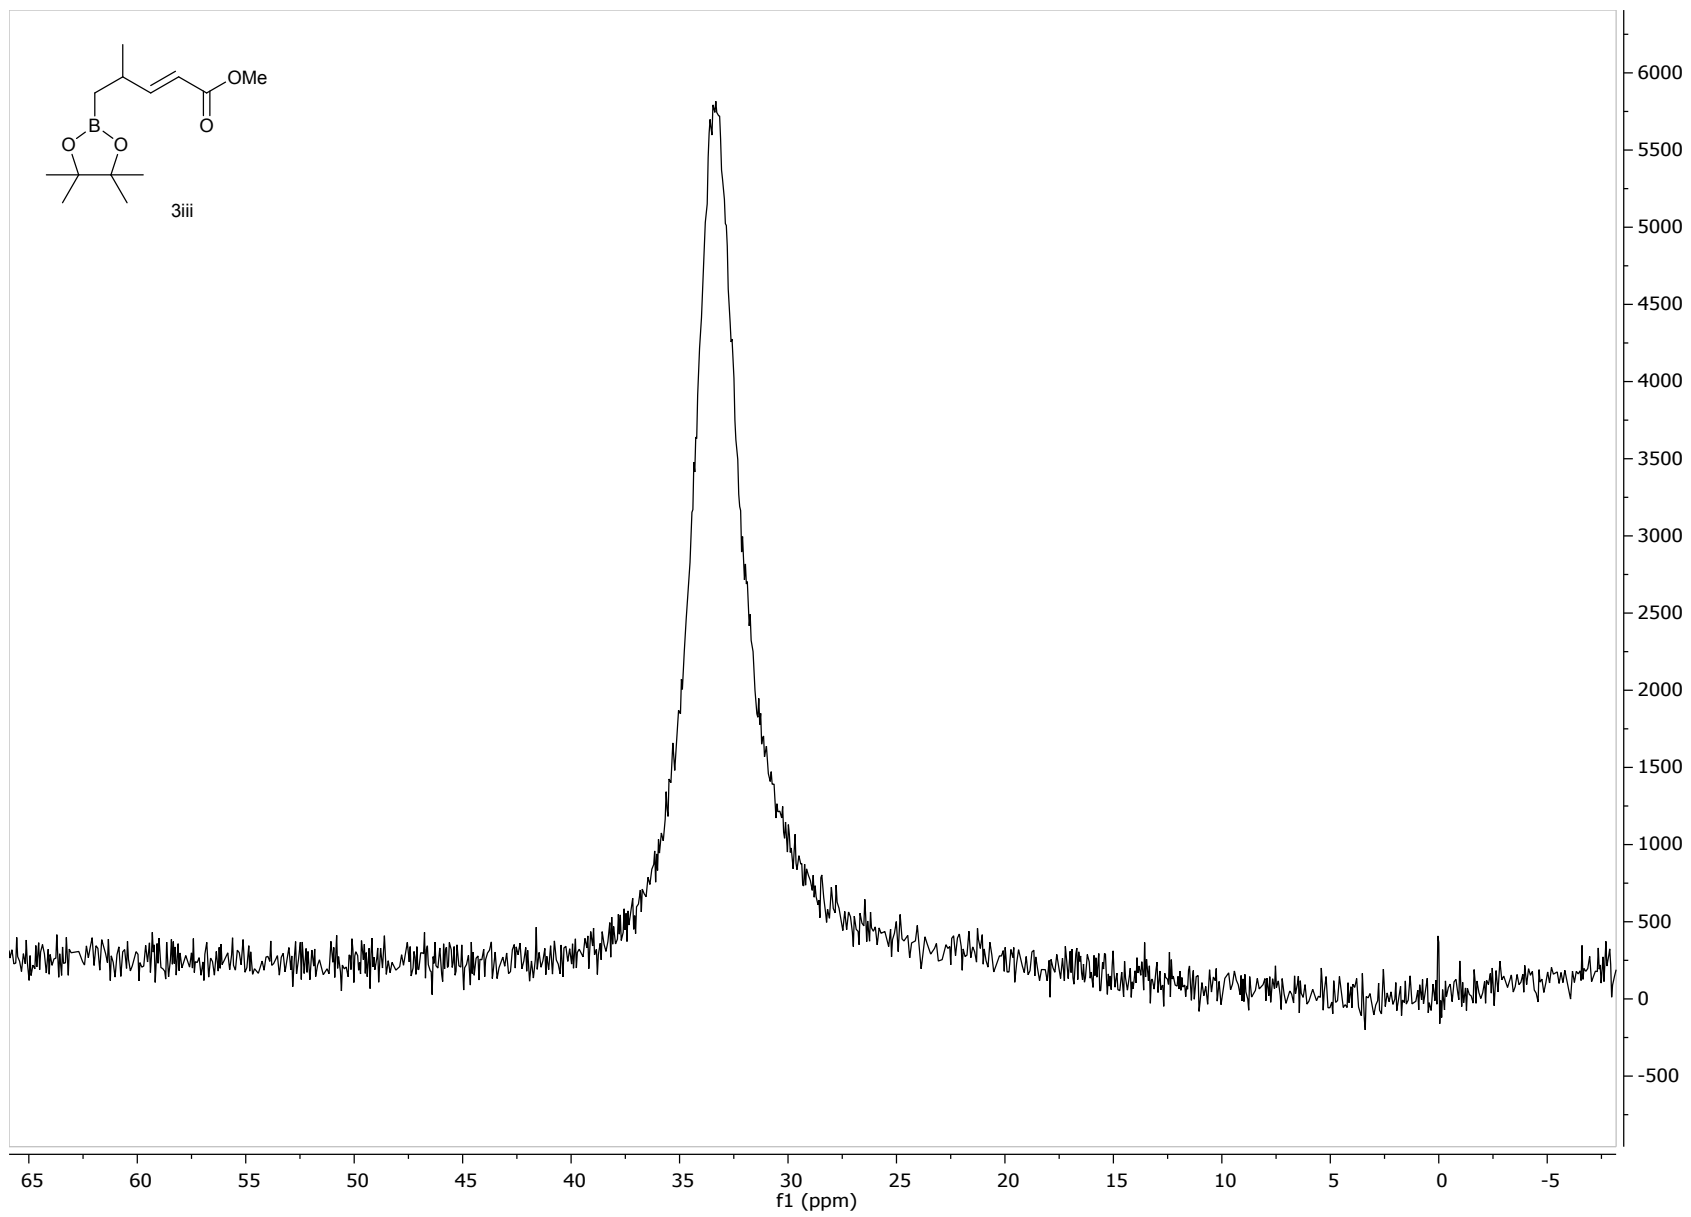

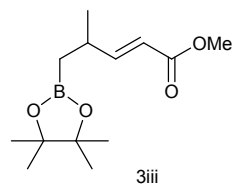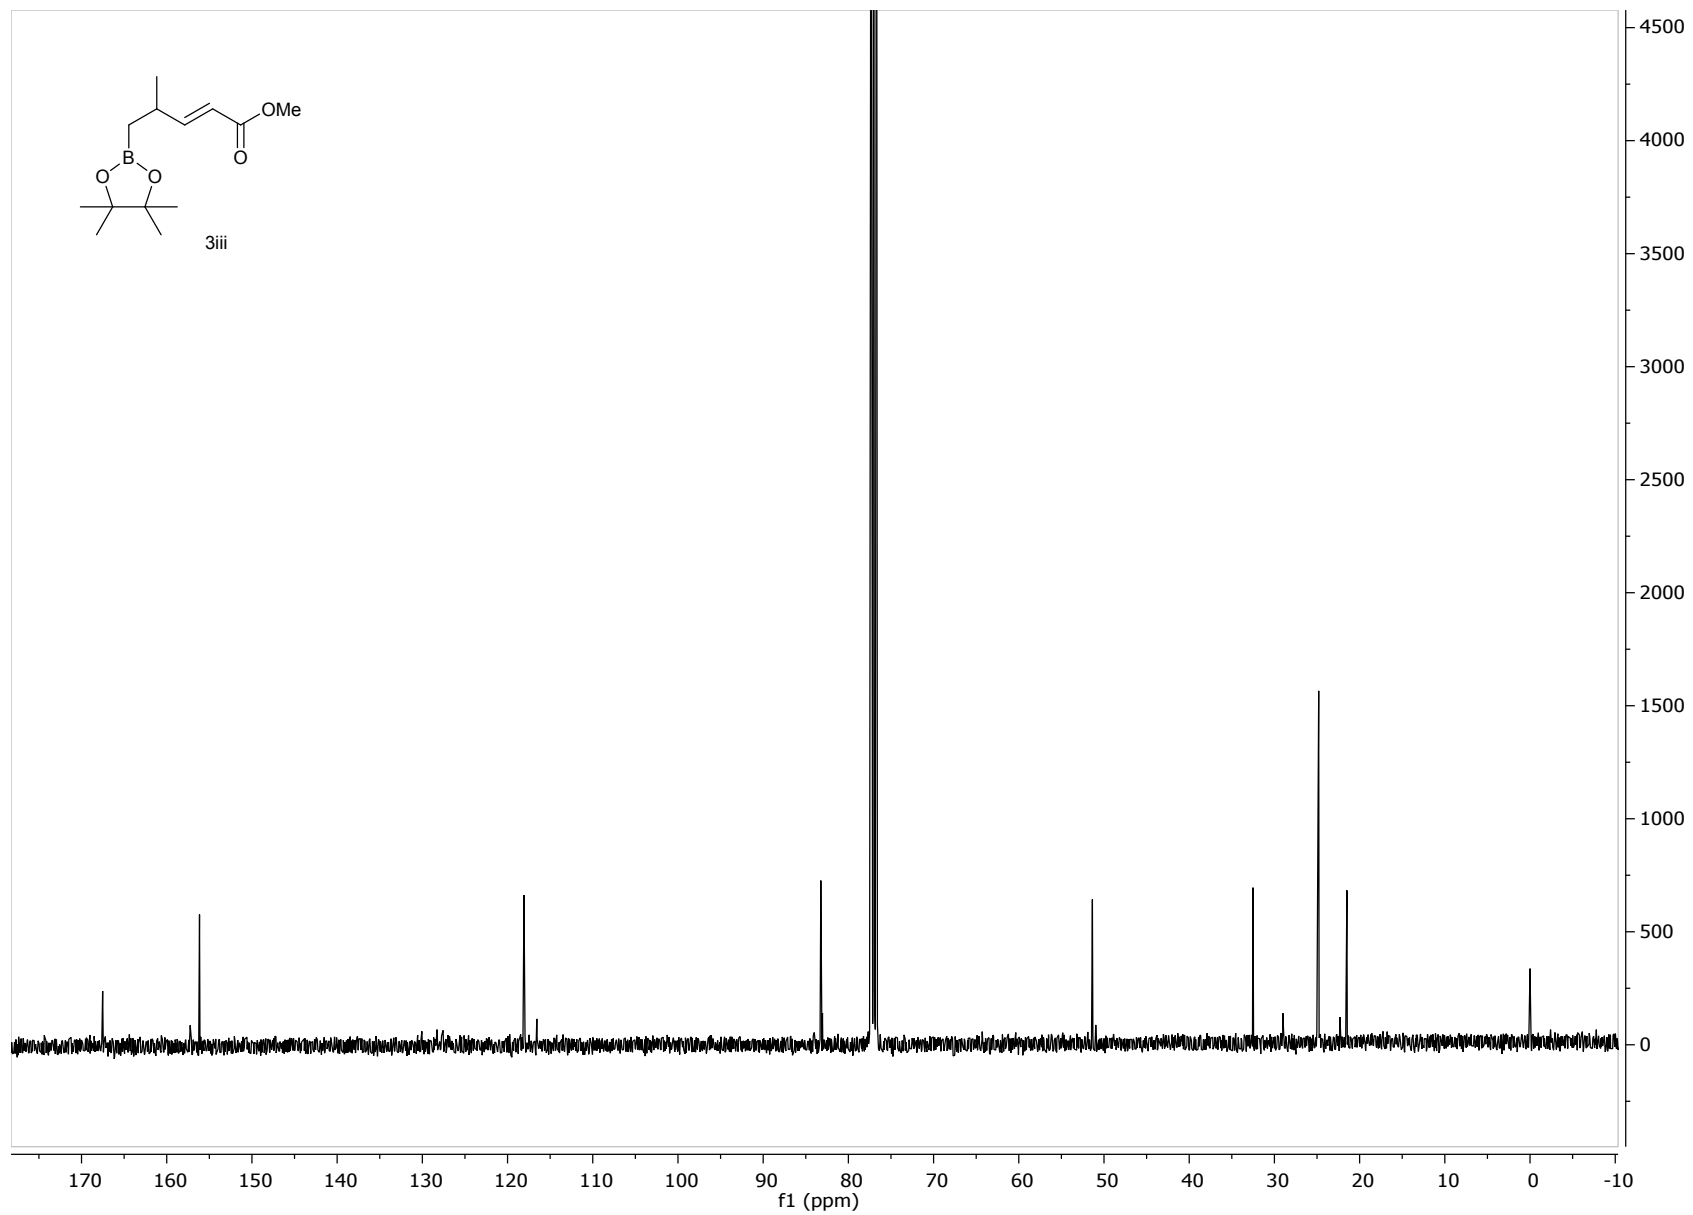



#### 4. Crystallographic data

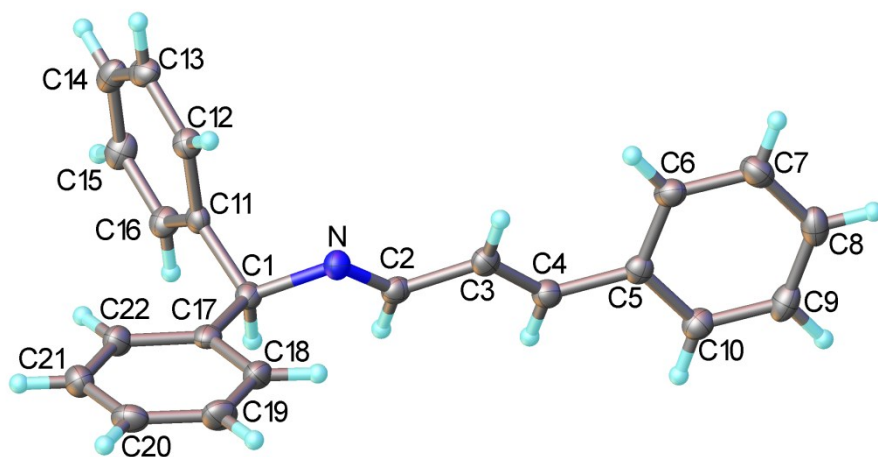

**Figure X1.** X-ray molecular structure of compound **4a** at 120 K. Here and below, atomic displacement ellipsoids are drawn at 50% probability level.

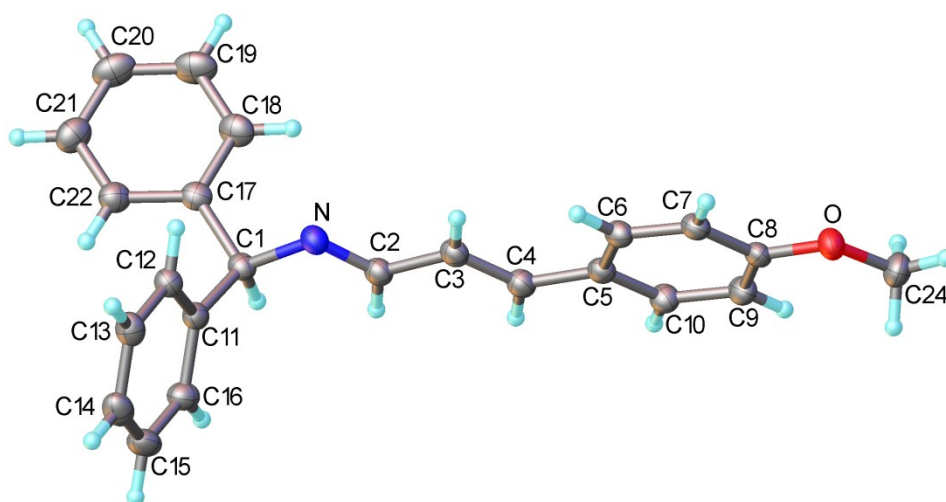

**Figure X2.** X-ray molecular structure of compound **4b** at 120 K.

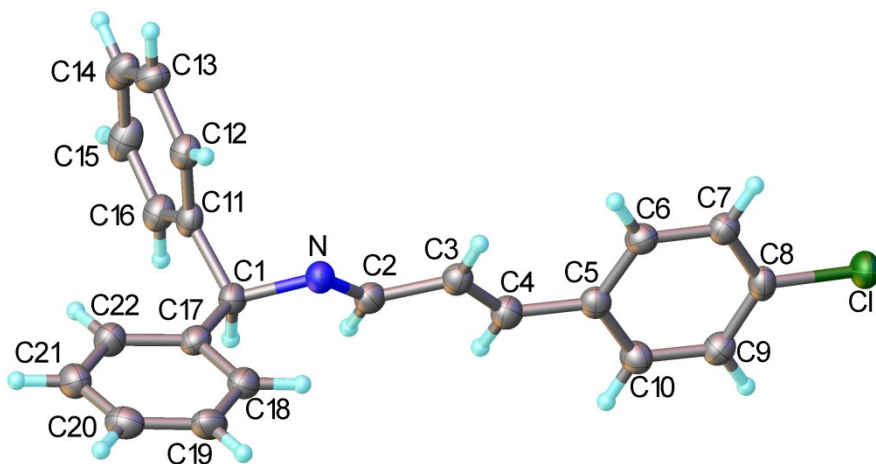

**Figure X3.** X-ray molecular structure of compound **4e** at 120 K.

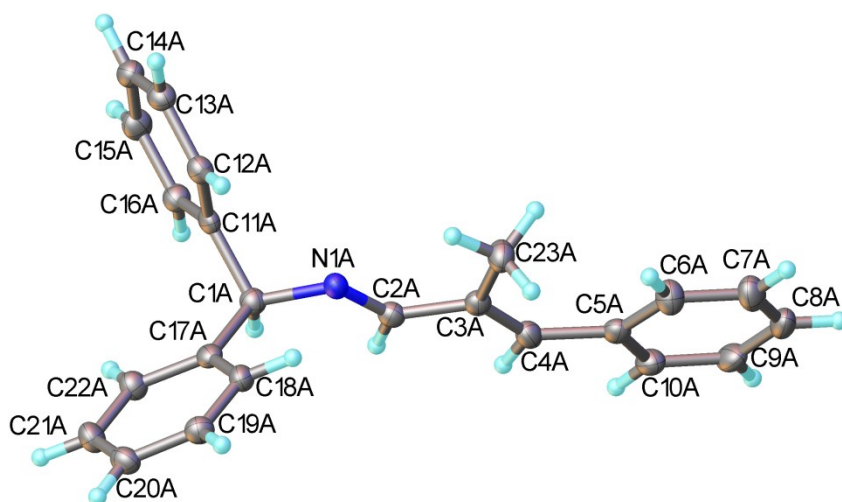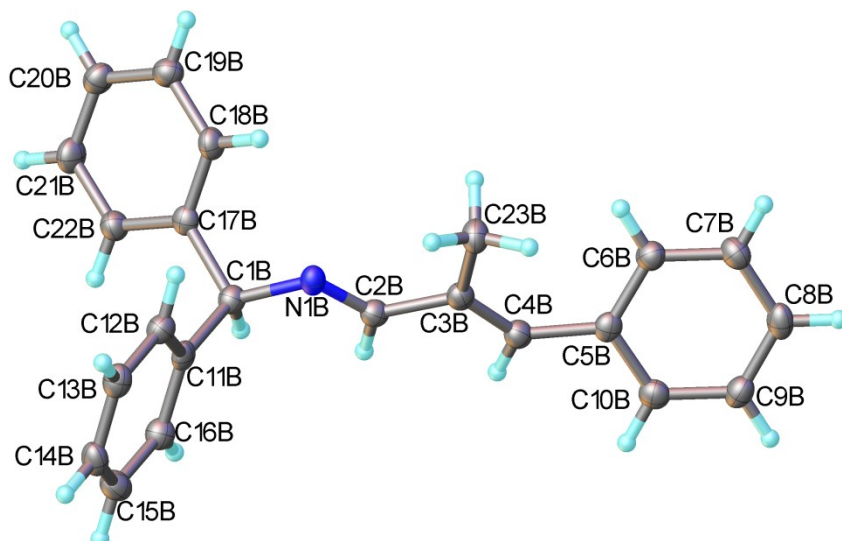

**Figure X4.** Two independent molecules in the crystal structure of compound **4h** at 120 K.

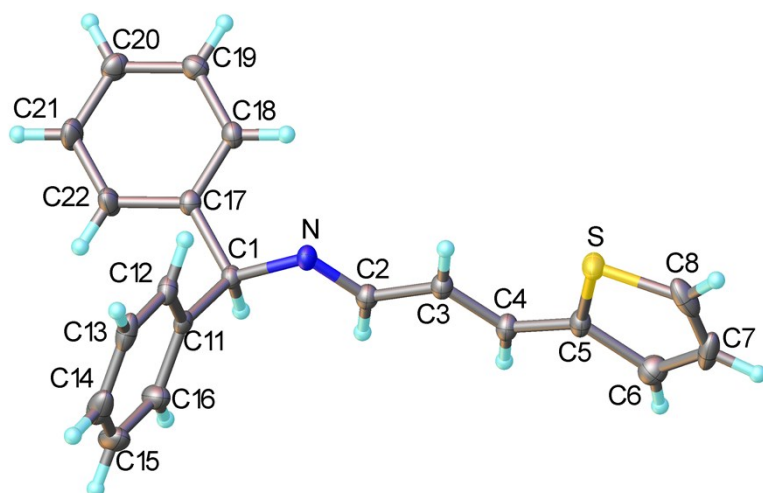

**Figure X5.** X-ray molecular structure of compound **4j** at 120 K; the thiophene ring is disordered between two opposite orientations in 4:1 ratio (minor atom positions are primed).

## 5. References

- 
1. A. D. J. Calow, A. Batsanov, A. Pujol, C. Solé, E. Fernández, A. Whiting, *Org. Lett.*, 2013, **15**, 4810-4813
  2. A. D. J. Calow, E. Fernández, A. Whiting, *Org. Biomol. Chem.*, 2014, **12**, 6121-6127.
